# Supplementary material for: The Complete Genome of the “Flavescence Dorée” Phytoplasma Reveals Characteristics of Low Genome Plasticity
Source: MDPI journal article supplement (doi:10.3390/biology11070953), 2022-06-23

## Supplementary Figure S1. Graphs from Phobius prediction of putative effectors

### Prediction of FIDop\_00023

```
ID FIDop_00023
FT SIGNAL      1    32
FT REGION      1    12      N-REGION.
FT REGION     13    24      H-REGION.
FT REGION     25    32      C-REGION.
FT TOPO_DOM    33   296      NON CYTOPLASMIC.
FT TRANSMEM   297   316
FT TOPO_DOM   317   320      CYTOPLASMIC.
//
```

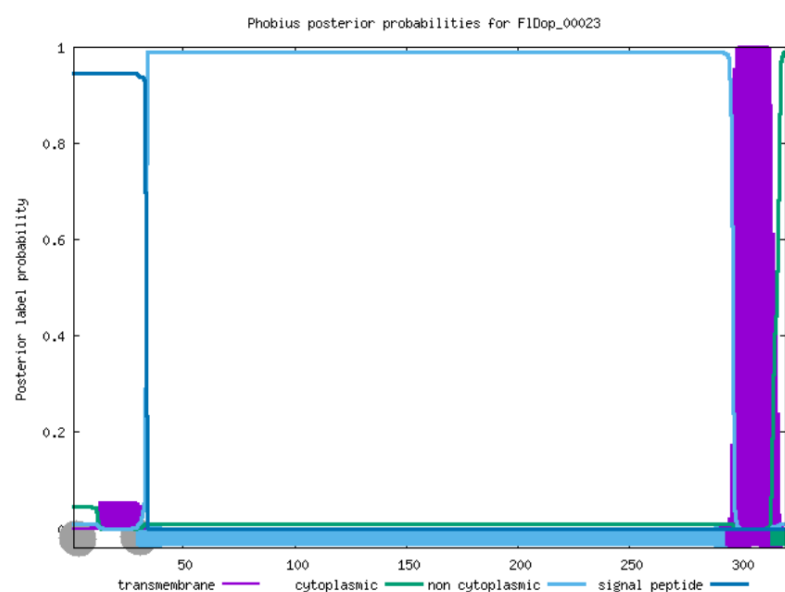

### Prediction of FIDop\_00035

```
ID FIDop_00035
FT TOPO_DOM    1    11      CYTOPLASMIC.
FT TRANSMEM   12    32
FT TOPO_DOM   33   497      NON CYTOPLASMIC.
//
```

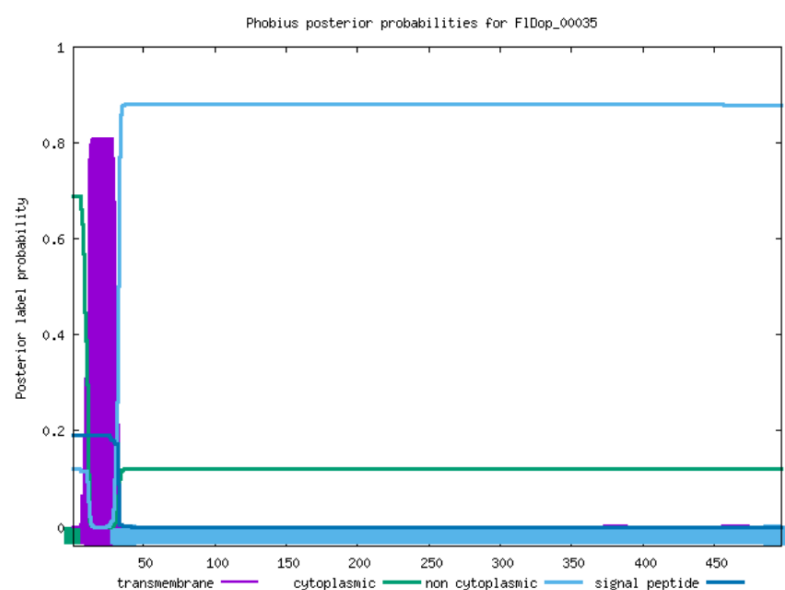

Prediction of FIDop\_00041

|    |             |     |     |                  |
|----|-------------|-----|-----|------------------|
| ID | FIDop_00041 |     |     |                  |
| FT | TOPO_DOM    | 1   | 11  | CYTOPLASMIC.     |
| FT | TRANSMEM    | 12  | 34  |                  |
| FT | TOPO_DOM    | 35  | 228 | NON CYTOPLASMIC. |
| FT | TRANSMEM    | 229 | 251 |                  |
| FT | TOPO_DOM    | 252 | 261 | CYTOPLASMIC.     |
| // |             |     |     |                  |

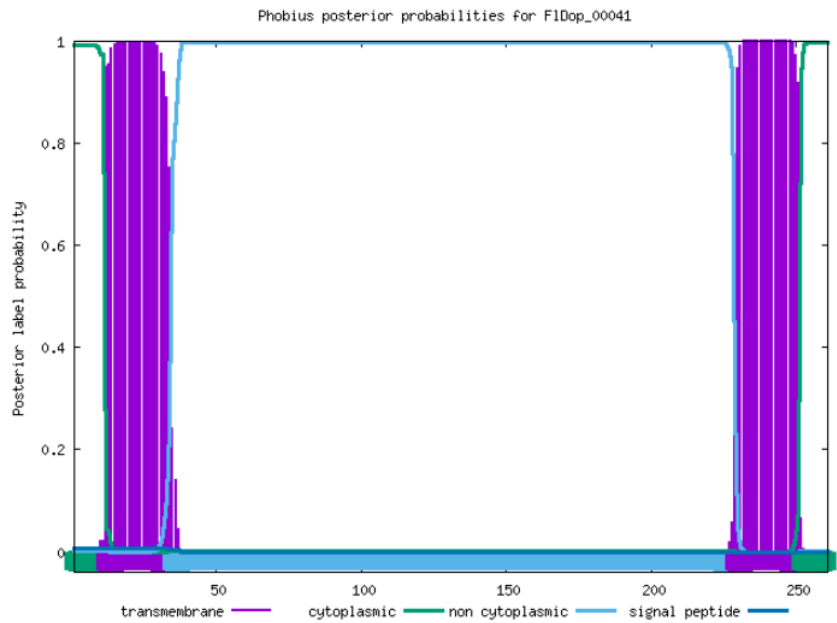

Prediction of FIDop\_00048

|    |             |     |     |  |                  |
|----|-------------|-----|-----|--|------------------|
| ID | FIDop_00048 |     |     |  |                  |
| FT | SIGNAL      | 1   | 34  |  |                  |
| FT | REGION      | 1   | 14  |  | N-REGION.        |
| FT | REGION      | 15  | 30  |  | H-REGION.        |
| FT | REGION      | 31  | 34  |  | C-REGION.        |
| FT | TOPO_DOM    | 35  | 645 |  | NON CYTOPLASMIC. |
| FT | TRANSMEM    | 646 | 666 |  |                  |
| FT | TOPO_DOM    | 667 | 673 |  | CYTOPLASMIC.     |
| // |             |     |     |  |                  |

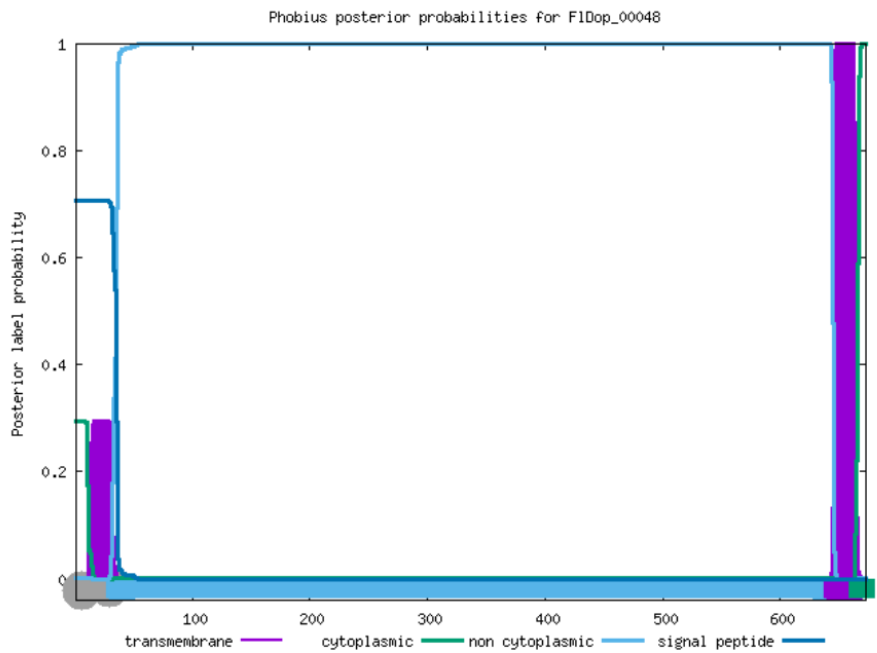

Prediction of FIDop\_00049

```
ID FIDop_00049
FT TOPO_DOM 1 11 CYTOPLASMIC.
FT TRANSMEM 12 32
FT TOPO_DOM 33 248 NON CYTOPLASMIC.
FT TRANSMEM 249 270
FT TOPO_DOM 271 285 CYTOPLASMIC.
//
```

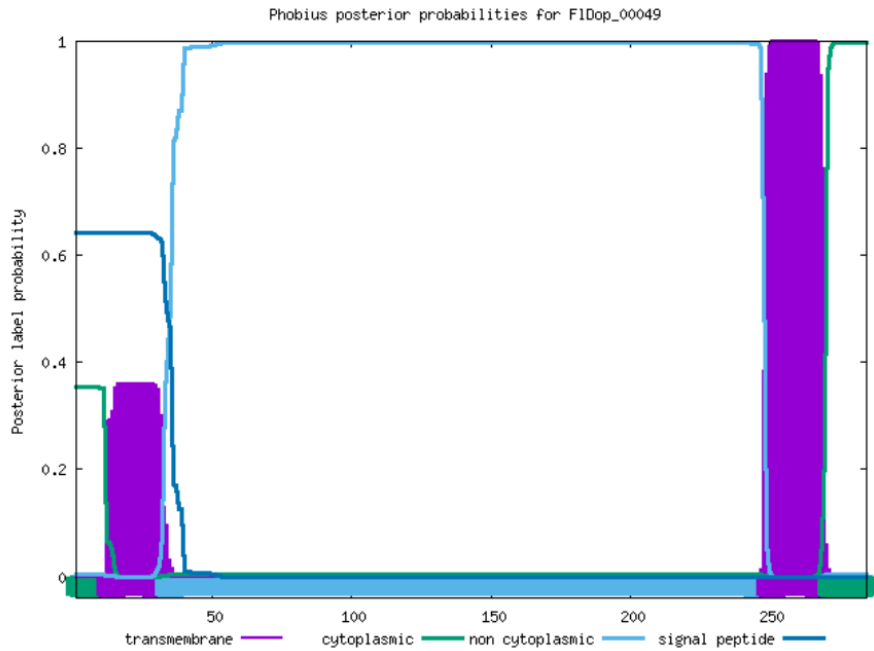

Prediction of FIDop\_00090

```
ID FIDop_00090
FT SIGNAL 1 32
FT REGION 1 12 N-REGION.
FT REGION 13 24 H-REGION.
FT REGION 25 32 C-REGION.
FT TOPO_DOM 33 445 NON CYTOPLASMIC.
//
```

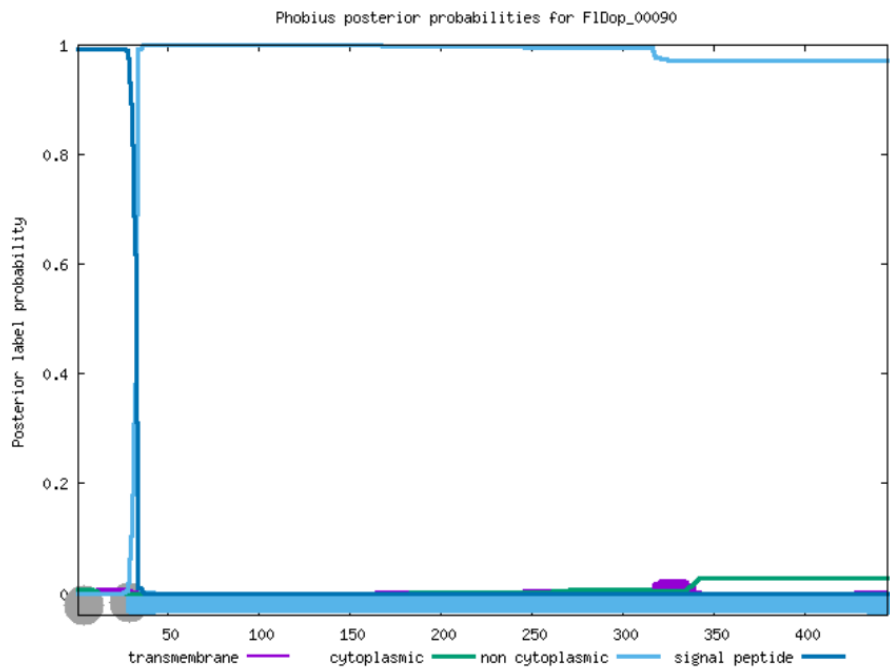

Prediction of FIDop\_00101

```
ID FIDop_00101
FT TOPO_DOM 1 11 CYTOPLASMIC.
FT TRANSMEM 12 32
FT TOPO_DOM 33 1038 NON CYTOPLASMIC.
FT TRANSMEM 1039 1058
FT TOPO_DOM 1059 1059 CYTOPLASMIC.
//
```

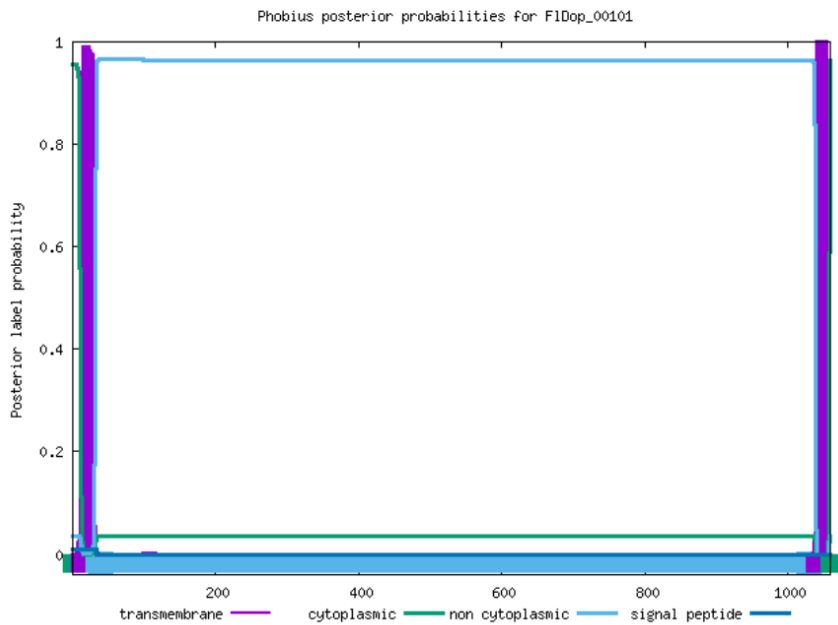

Prediction of FIDop\_00112

```
ID FIDop_00112
FT SIGNAL 1 19
FT REGION 1 2 N-REGION.
FT REGION 3 14 H-REGION.
FT REGION 15 19 C-REGION.
FT TOPO_DOM 20 108 NON CYTOPLASMIC.
//
```

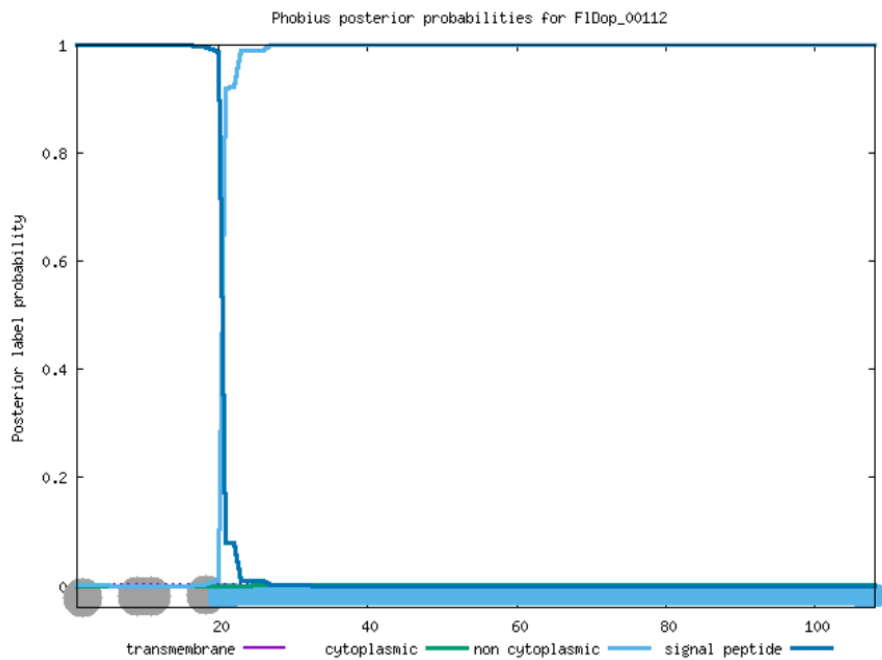

Prediction of FIDop\_00153

```
ID FIDop_00153
FT TOPO_DOM 1 13 NON CYTOPLASMIC.
FT TRANSMEM 14 35
FT TOPO_DOM 36 382 CYTOPLASMIC.
//
```

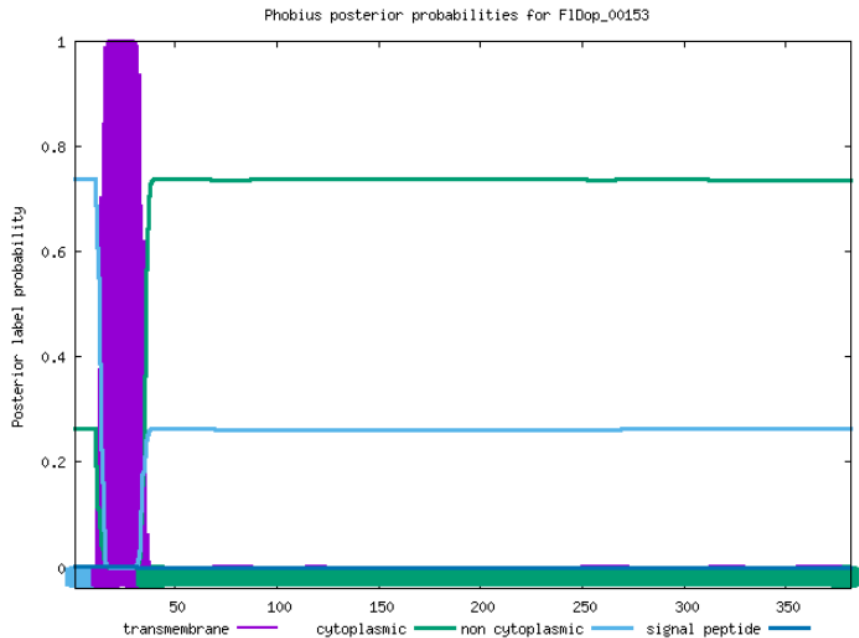

Prediction of FIDop\_00158

```
ID FIDop_00158
FT SIGNAL 1 36
FT REGION 1 15 N-REGION.
FT REGION 16 28 H-REGION.
FT REGION 29 36 C-REGION.
FT TOPO_DOM 37 234 NON CYTOPLASMIC.
//
```

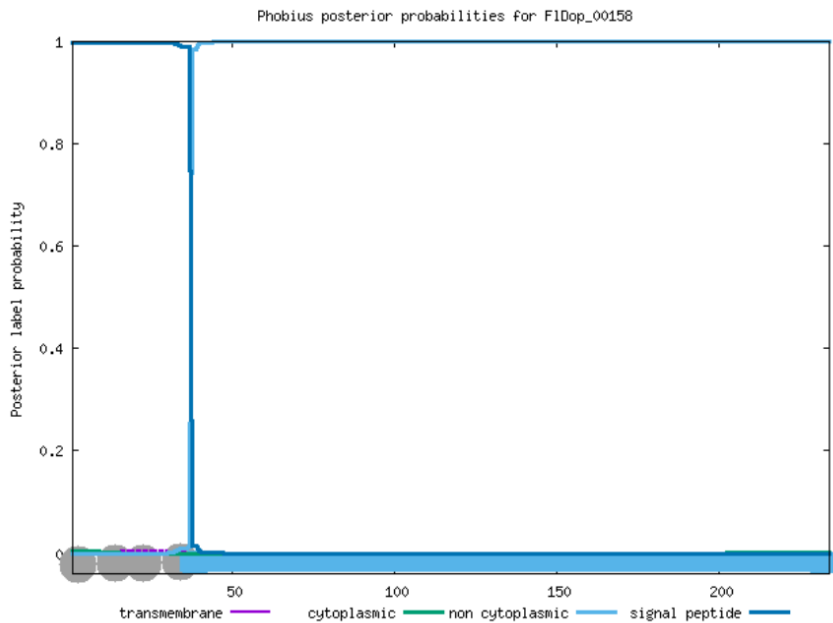

Prediction of FIDop\_00183

|    |             |    |     |                  |
|----|-------------|----|-----|------------------|
| ID | FIDop_00183 |    |     |                  |
| FT | SIGNAL      | 1  | 33  |                  |
| FT | REGION      | 1  | 12  | N-REGION.        |
| FT | REGION      | 13 | 24  | H-REGION.        |
| FT | REGION      | 25 | 33  | C-REGION.        |
| FT | TOPO_DOM    | 34 | 137 | NON CYTOPLASMIC. |
| // |             |    |     |                  |

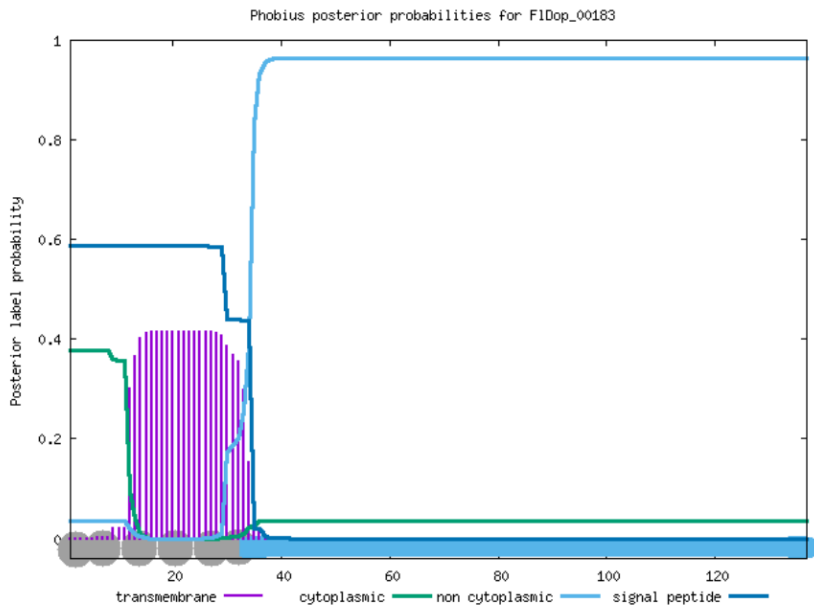

Prediction of FIDop\_00185

|    |             |    |     |                  |
|----|-------------|----|-----|------------------|
| ID | FIDop_00185 |    |     |                  |
| FT | SIGNAL      | 1  | 32  |                  |
| FT | REGION      | 1  | 9   | N-REGION.        |
| FT | REGION      | 10 | 25  | H-REGION.        |
| FT | REGION      | 26 | 32  | C-REGION.        |
| FT | TOPO_DOM    | 33 | 125 | NON CYTOPLASMIC. |
| // |             |    |     |                  |

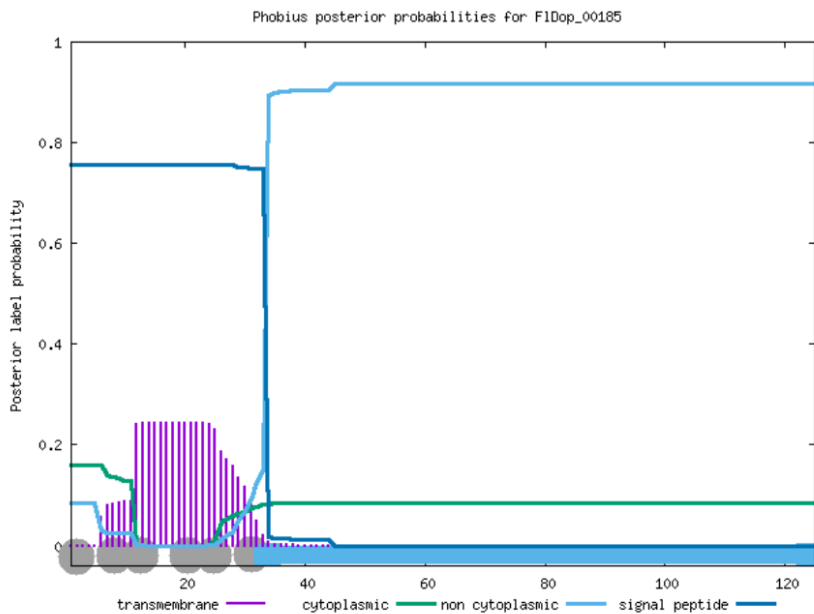

Prediction of FIDop\_00190

```
ID FIDop_00190
FT SIGNAL      1    17
FT REGION      1     4      N-REGION.
FT REGION      5    12      H-REGION.
FT REGION     13    17      C-REGION.
FT TOPO_DOM    18   117      NON CYTOPLASMIC.
//
```

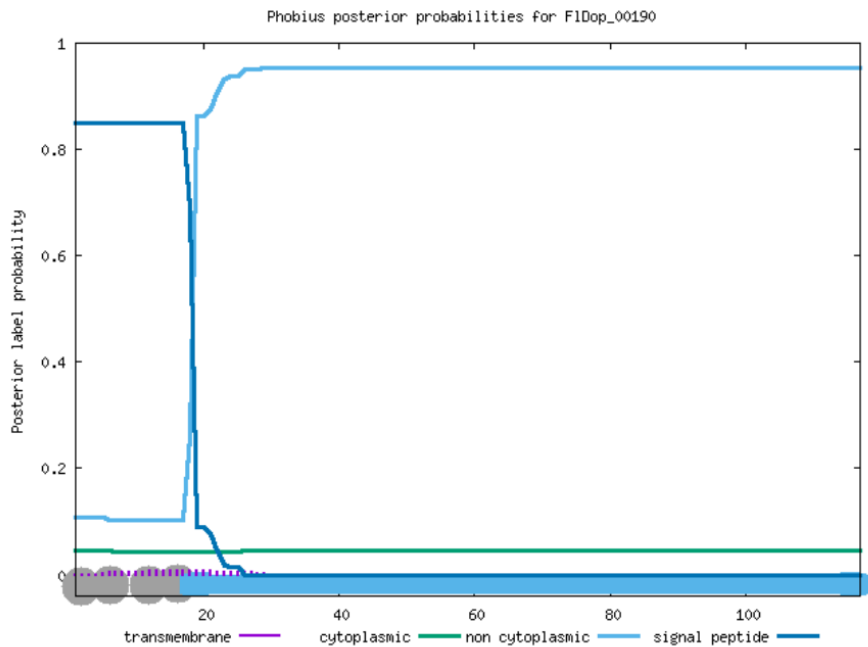

Prediction of FIDop\_00246

```
ID FIDop_00246
FT SIGNAL      1    30
FT REGION      1    13      N-REGION.
FT REGION     14    25      H-REGION.
FT REGION     26    30      C-REGION.
FT TOPO_DOM    31   211      NON CYTOPLASMIC.
//
```

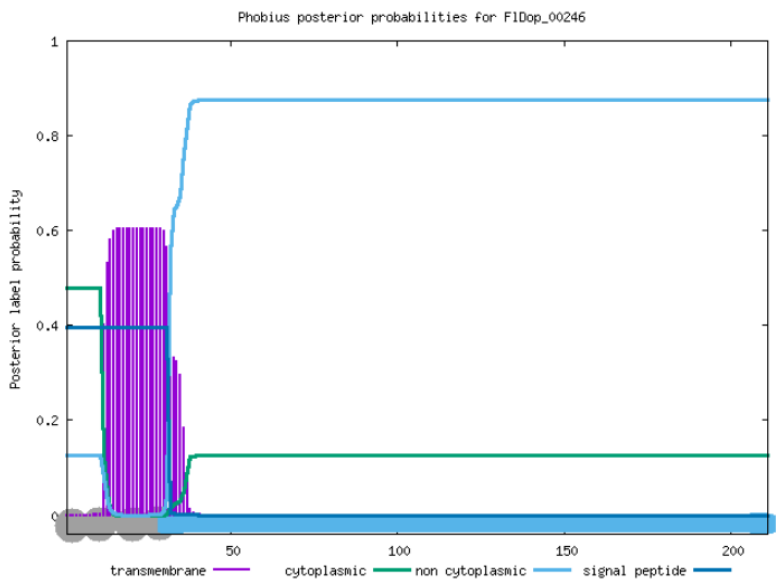

### Prediction of FIDop\_00265

```

ID   FIDop_00265
FT   TOPO_DOM    1     6     CYTOPLASMIC.
FT   TRANSMEM    7    27
FT   TOPO_DOM    28   626    NON CYTOPLASMIC.
//
  
```

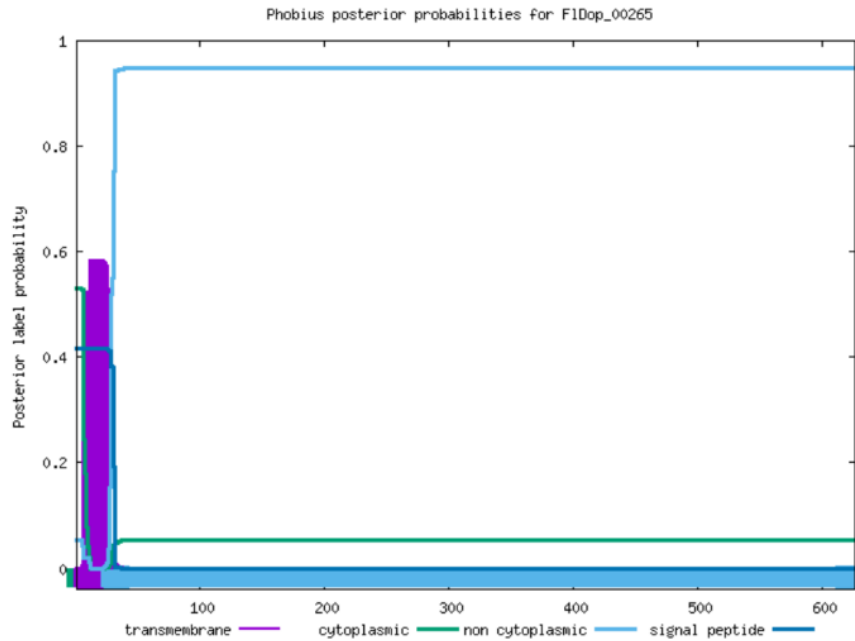

### Prediction of FIDop\_00266

```

ID   FIDop_00266
FT   SIGNAL      1     35
FT   REGION      1     18    N-REGION.
FT   REGION     19     30    H-REGION.
FT   REGION     31     35    C-REGION.
FT   TOPO_DOM    36   450    NON CYTOPLASMIC.
//
  
```

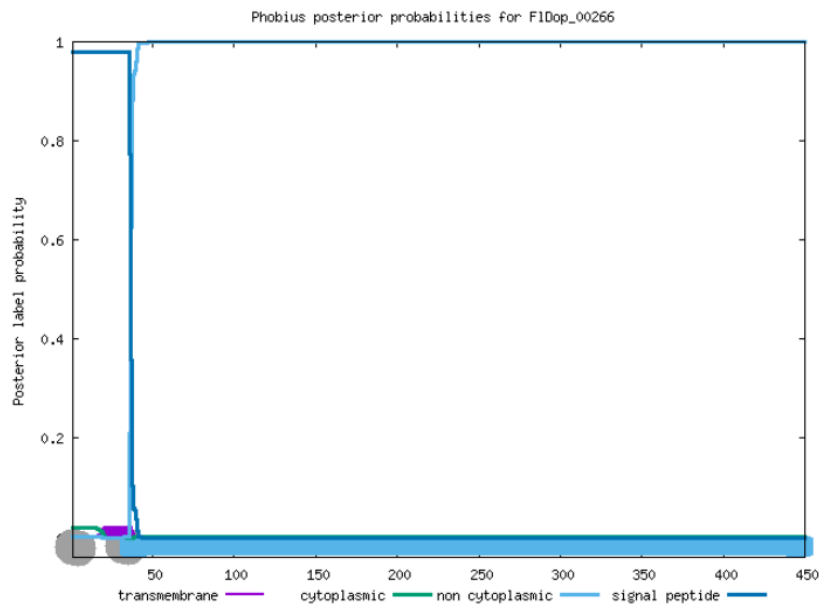



# **Prediction of FIDop\_00269**

```

ID   FIDop_00269
FT   TOPO_DOM    1     11    CYTOPLASMIC.
FT   TRANSMEM    12    32
FT   TOPO_DOM    33    497    NON CYTOPLASMIC.
//
  
```

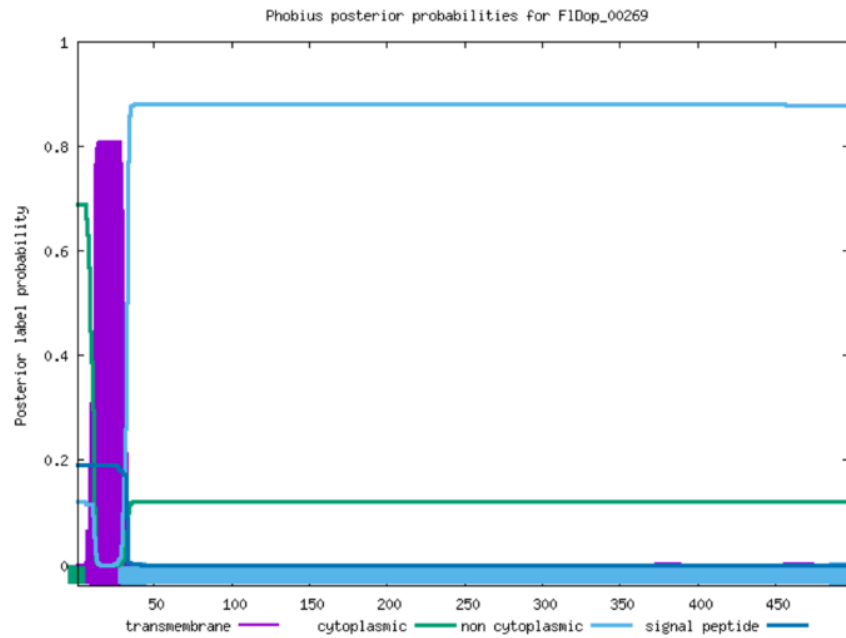

```

ID   FIDop_00278
FT   SIGNAL      1     16
FT   REGION      1     1    N-REGION.
FT   REGION      2     10    H-REGION.
FT   REGION      11    16    C-REGION.
FT   TOPO_DOM    17    118    NON CYTOPLASMIC.
//
  
```

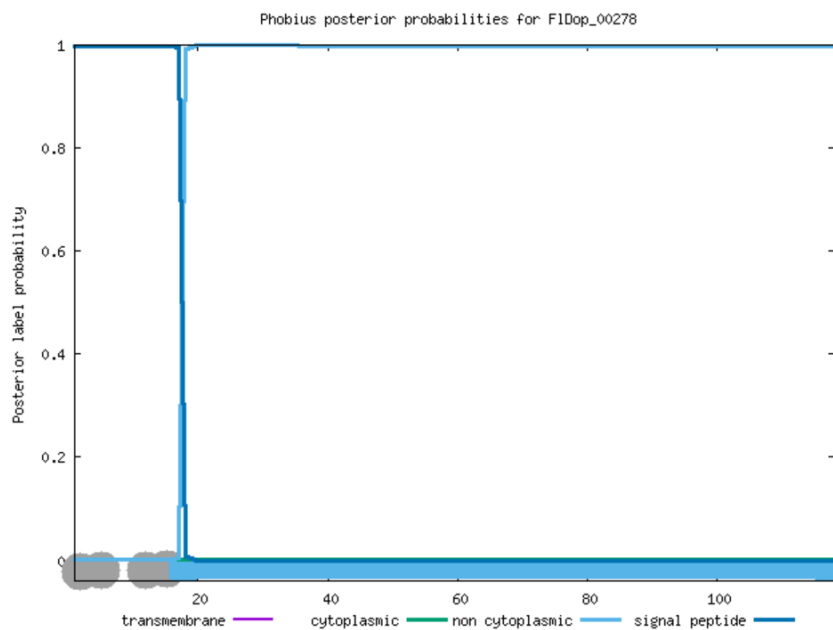

Prediction of FIDop\_00279

```
ID FIDop_00279
FT TOPO_DOM 1 11 CYTOPLASMIC.
FT TRANSMEM 12 31
FT TOPO_DOM 32 83 NON CYTOPLASMIC.
FT TRANSMEM 84 104
FT TOPO_DOM 105 131 CYTOPLASMIC.
//
```

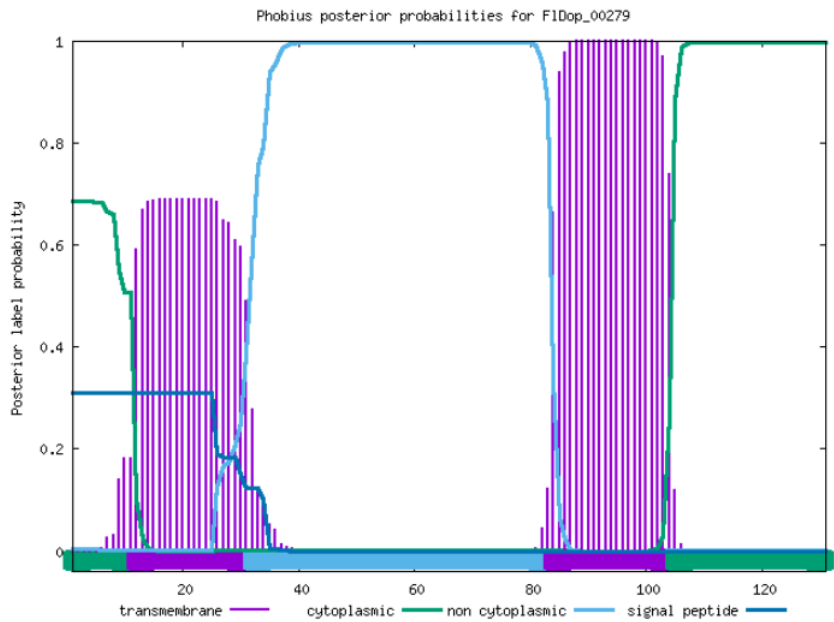

```
ID FIDop_00292
FT TOPO_DOM 1 11 CYTOPLASMIC.
FT TRANSMEM 12 32
FT TOPO_DOM 33 125 NON CYTOPLASMIC.
FT TRANSMEM 126 156
FT TOPO_DOM 157 599 CYTOPLASMIC.
//
```

ftsH protein

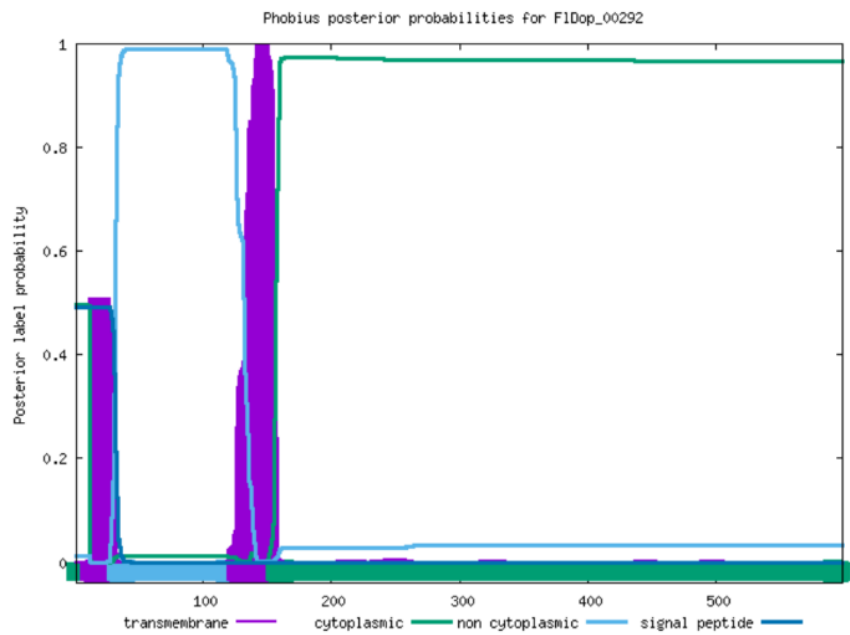

```

ID FIDop_00298
FT SIGNAL 1 33
FT REGION 1 12 N-REGION.
FT REGION 13 24 H-REGION.
FT REGION 25 33 C-REGION.
FT TOPO_DOM 34 398 NON CYTOPLASMIC.
//

```

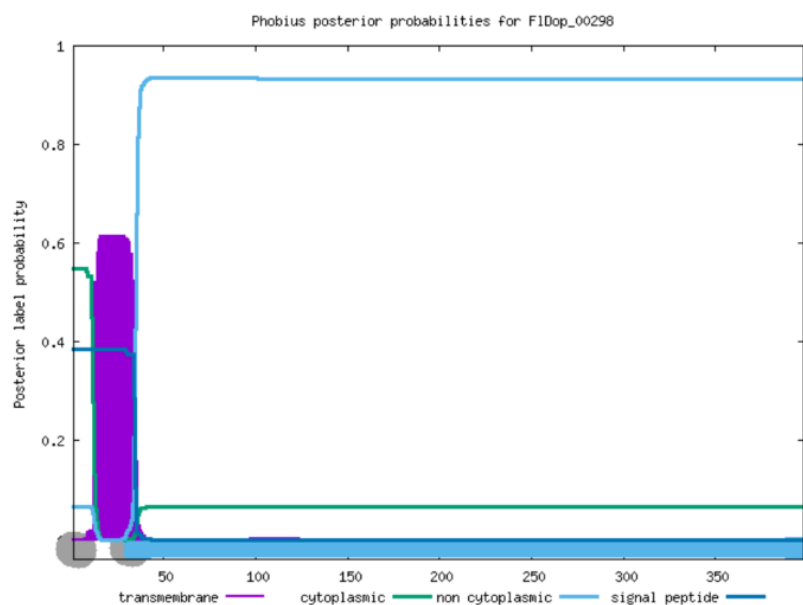

#### Prediction of FIDop\_00402

```

ID FIDop_00402
FT TOPO_DOM 1 11 CYTOPLASMIC.
FT TRANSMEM 12 39
FT TOPO_DOM 40 170 NON CYTOPLASMIC.
FT TRANSMEM 171 189
FT TOPO_DOM 190 204 CYTOPLASMIC.
//

```

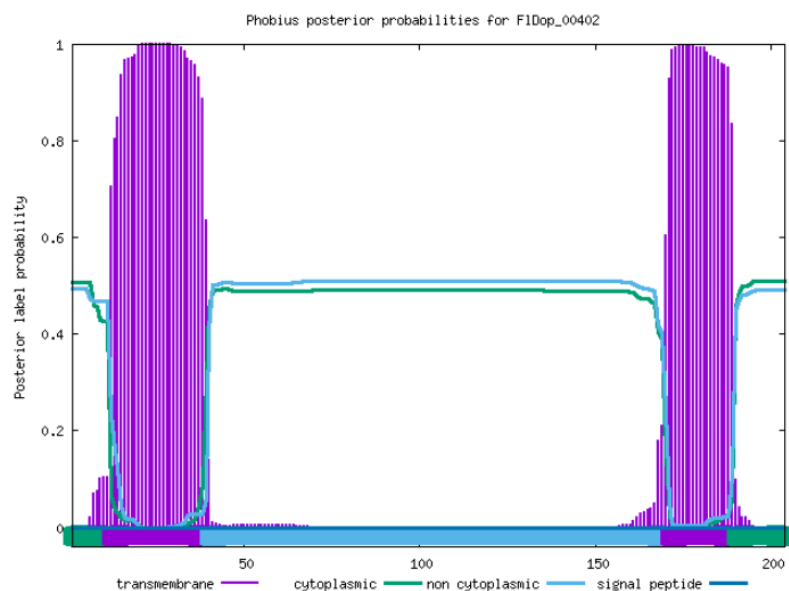

```

ID   FIDop_00420
FT   SIGNAL       1   29
FT   REGION       1   13   N-REGION.
FT   REGION      14   25   H-REGION.
FT   REGION      26   29   C-REGION.
FT   TOPO_DOM     30   324  NON CYTOPLASMIC.
//

```

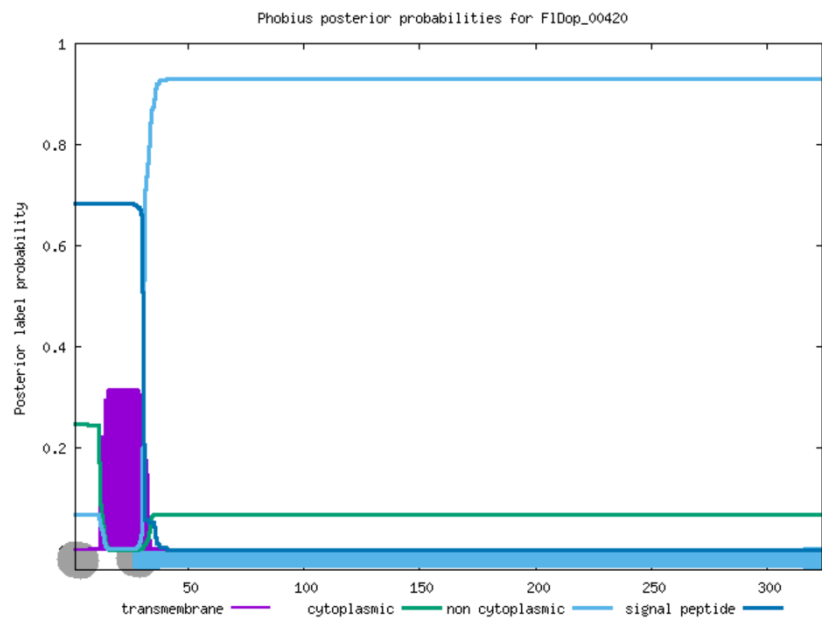

#### Prediction of FIDop\_00531

```

ID   FIDop_00531
FT   SIGNAL       1   32
FT   REGION       1   12   N-REGION.
FT   REGION      13   24   H-REGION.
FT   REGION      25   32   C-REGION.
FT   TOPO_DOM     33   122  NON CYTOPLASMIC.
//

```

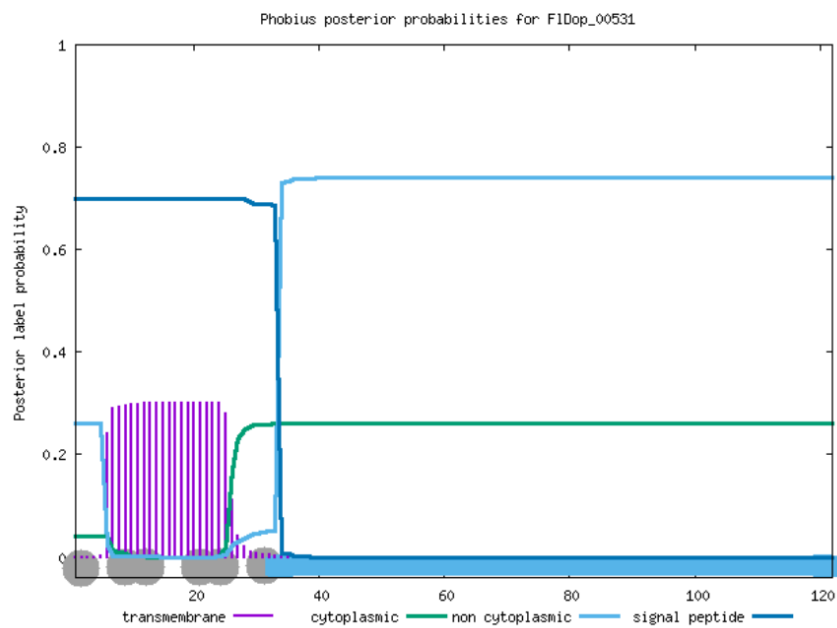

Supplement: s1 [file s1]
