# Supplementary material for: The Complete Genome of the “Flavescence Dorée” Phytoplasma Reveals Characteristics of Low Genome Plasticity
Source: MDPI journal article supplement (doi:10.3390/biology11070953), 2022-06-23

**Figure S2.** GC skew plots generated with GenSkew online tool (<https://genskew.csb.univie.ac.at/webskew>). Plots are displayed with a sliding window of 5 kb and a step size of 0.5 kb.

Gen-skew plot for sequence: Draft\_CaPvitis.fasta, with stepsize: 500 and window size: 5000

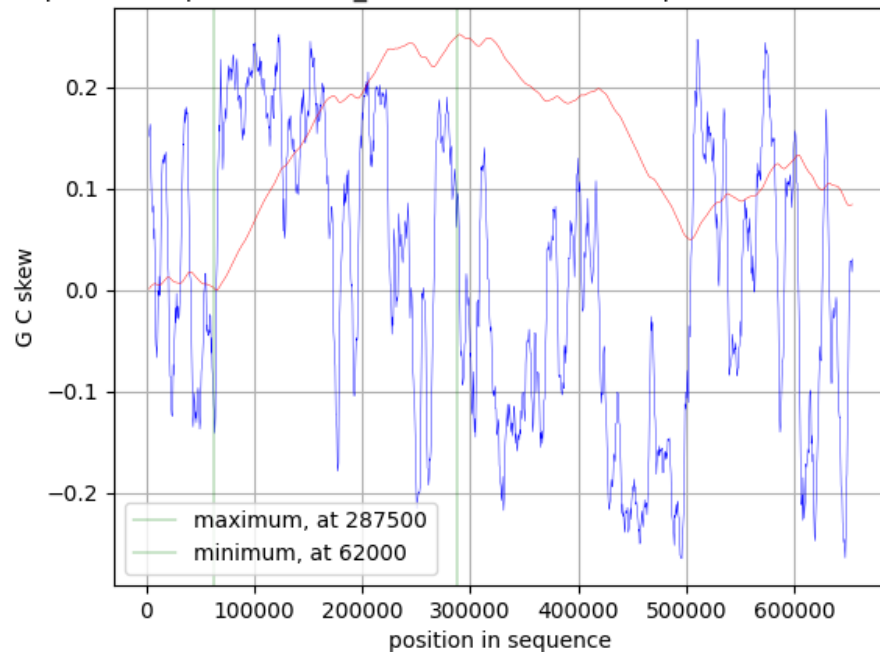

Gen-skew plot for sequence: CP025121\_CaPziziphi.fasta, with stepsize: 500 and window size: 5000

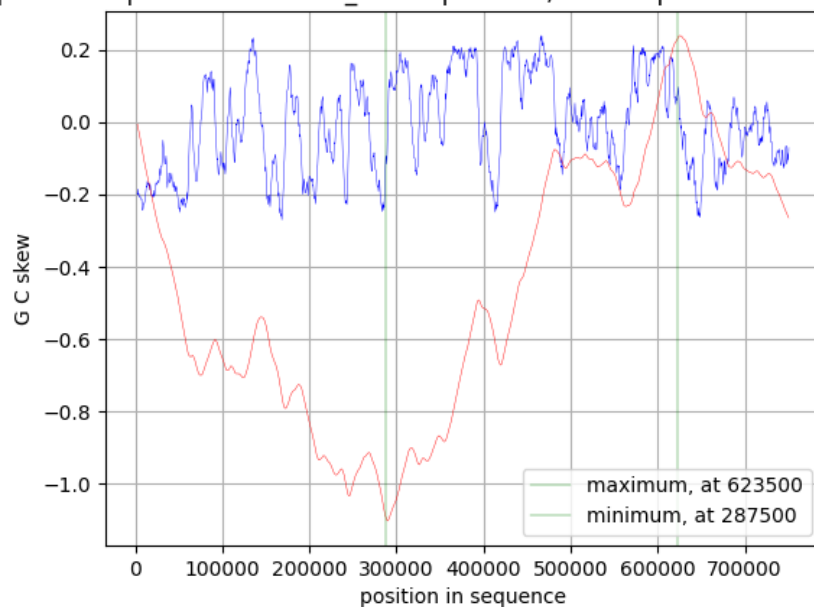

Gen-skew plot for sequence: NZ\_CP054393\_CaPluffae.fasta, with stepsize: 500 and window size: 5000

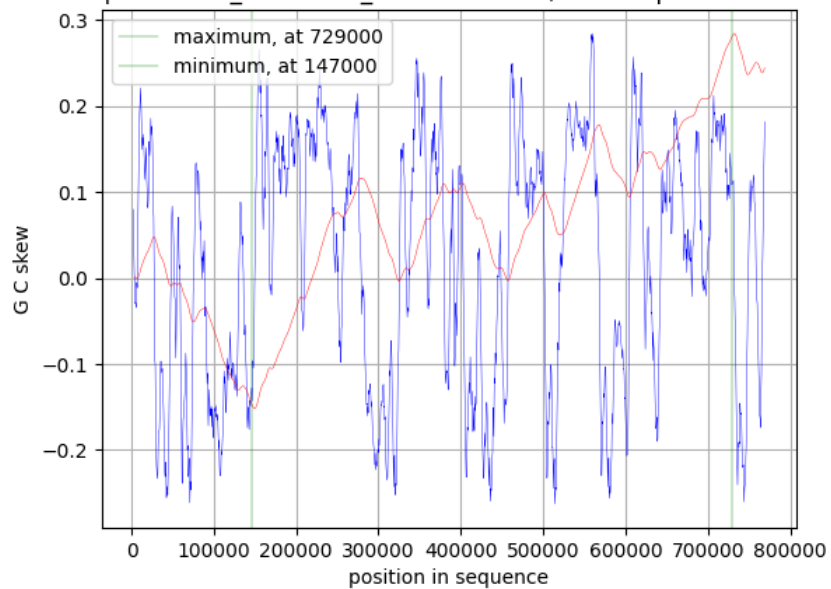

Gen-skew plot for sequence: NC\_011047\_CaPmali.fasta, with stepsize: 500 and window size: 5000

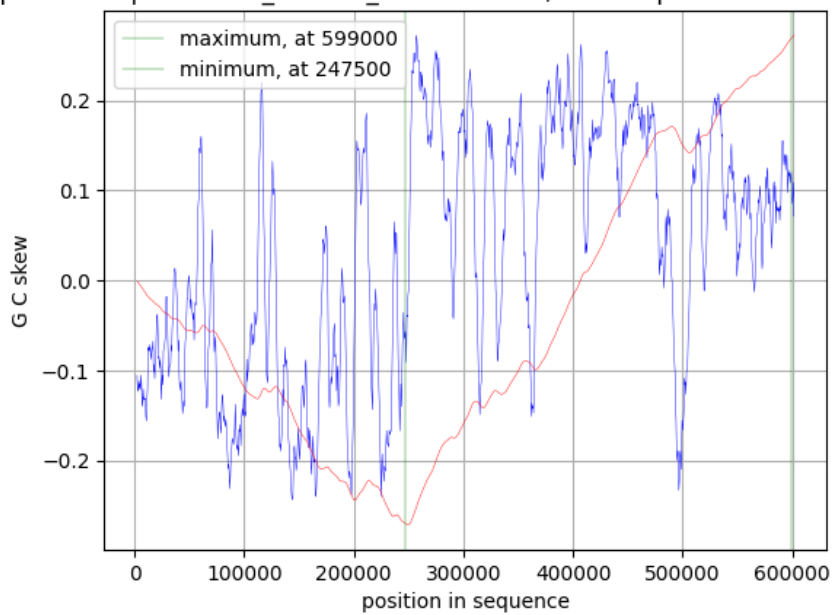

Gen-skew plot for sequence: CP040925\_CaPaurantifolia.fasta, with stepsize: 500 and window size: 5000

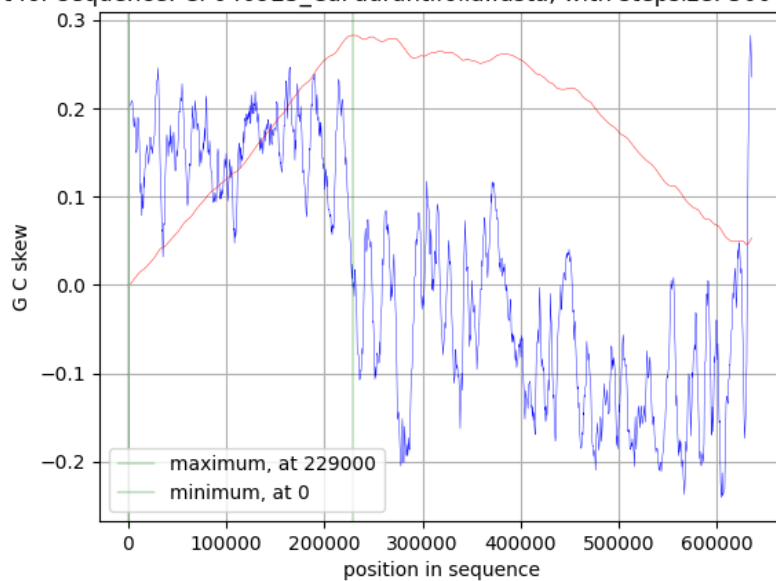

Gen-skew plot for sequence: AP006628\_CaPasteris\_OYM.fasta, with stepsize: 500 and window size: 5000

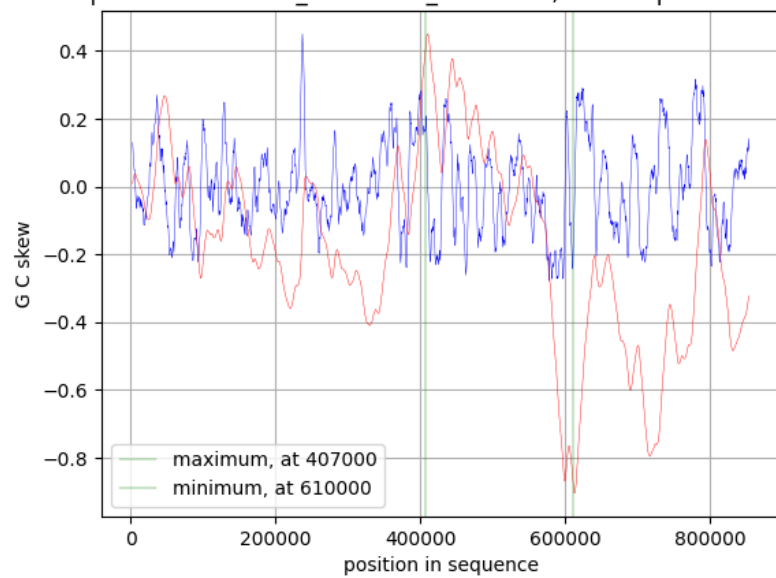

Gen-skew plot for sequence: NC\_007716\_CaPasteris\_AYWB.fasta, with stepsize: 500 and windowsize: 5000

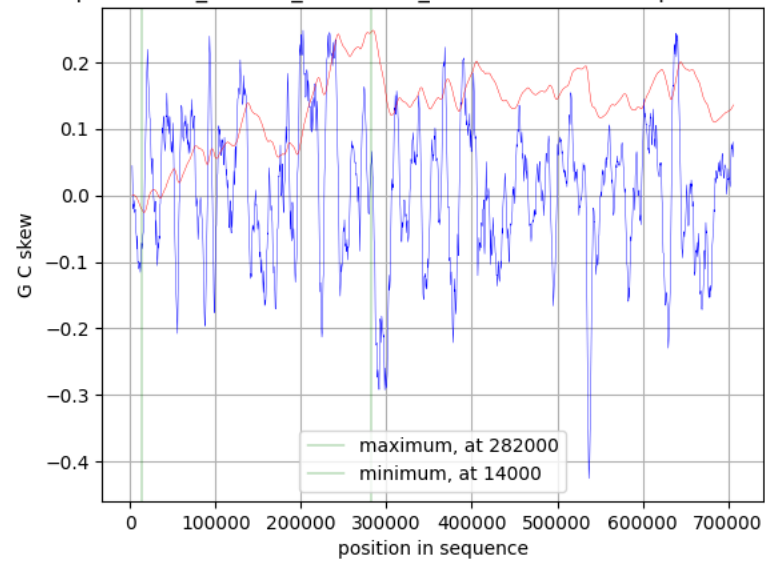

Gen-skew plot for sequence: NC\_021236\_CaPaustaliense.fasta, with stepsize: 500 and windowsize: 5000

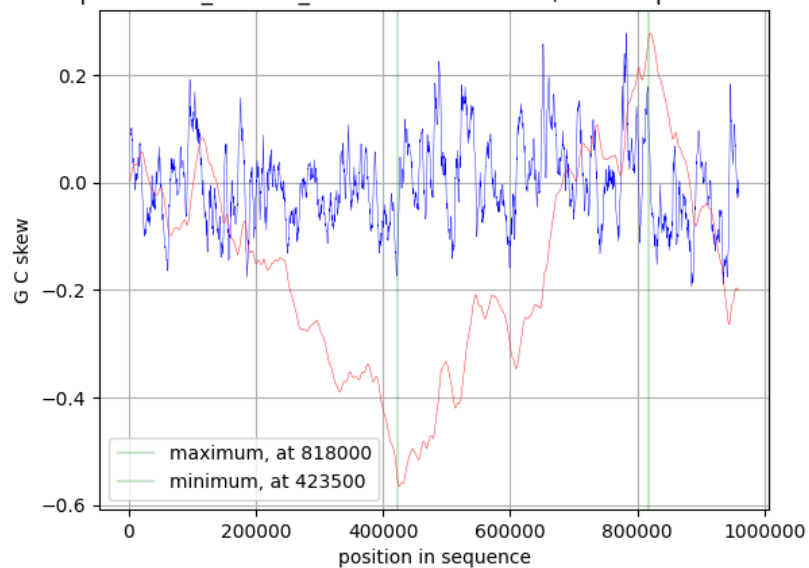

Supplement: s1 [file s1]
