# Supplementary material for: The Complete Genome of the “Flavescence Dorée” Phytoplasma Reveals Characteristics of Low Genome Plasticity
Source: Biology (Basel). 2022 Jun 23;11(7):953. doi: 10.3390/biology11070953 (PMC9312162; doi:10.3390/biology11070953)
Supplement: Supplementary file 1 [file biology-11-00953-s001.zip]

Archive with 6 entries (6 files):
- Supplementary Table_S1.xlsx
- Supplementary Table_S2.xlsx
- Supplementary Table_S3.xlsx
- Supplementary Table_S4.xlsx
- supplementary_Figure S1.pdf
- supplementary_Figure S2.pdf
