# Supplementary material for: The Complete Genome of the “Flavescence Dorée” Phytoplasma Reveals Characteristics of Low Genome Plasticity
Source: Biology (Basel). 2022 Jun 23;11(7):953. doi: 10.3390/biology11070953 (PMC9312162; doi:10.3390/biology11070953)
Supplement: Supplementary file 1 [file biology-11-00953-s001.zip › Supplementary Table_S1.xlsx]

## Sheet: Flye Contigs
	Table S1. List of contigs from the initial assembly with Flye
	Contig #	Contig Length	Subject	Matching length	E-value	Bitscore	Note
	contig_3943	651724	CP025121.1	28964	0	43033
	contig_4285	187765	JABUOH010000044.1	1262	0	730	match on 16S ribosomal RNA of endosymbiotic bacteria
	contig_3714	1383031	JABUOH010000044.1	1186	1.28e-172	616	match on 16S ribosomal RNA of endosymbiotic bacteria
	contig_551	1262192	JABUOH010000044.1	1186	5.44e-171	610	match on 16S ribosomal RNA of endosymbiotic bacteria
	contig_3712	897194	JABUOH010000044.1	1187	1.8e-169	604	match on 16S ribosomal RNA of endosymbiotic bacteria
	contig_833	99592	CU469464.1	1191	2.16e-115	422	match on 16S ribosomal RNA of endosymbiotic bacteria
	contig_5451	52577	CU469464.1	33	2.86e-07	62.1
	contig_1782	150972	PUUG01000077.1	35	2.95e-06	60.2
	contig_10694	61817	PUUG01000077.1	31	4.35e-06	58.4
	contig_11936	52295	PUUG01000077.1	31	3.68e-06	58.4
	contig_2067	147484	PUUG01000077.1	38	1.04e-05	58.4
	contig_3106	42249	PUUG01000077.1	31	2.97e-06	58.4
	contig_3458	116043	CU469464.1	35	8.17e-06	58.4
	contig_4085	497521	PUUG01000077.1	31	3.5e-05	58.4
	contig_6613	69503	PUUG01000077.1	31	4.89e-06	58.4
	contig_6927	54472	PUUG01000077.1	31	3.83e-06	58.4
	contig_7786	133201	PUUG01000077.1	31	9.37e-06	58.4
	contig_8584	16449	PUUG01000077.1	31	1.16e-06	58.4
	contig_11993	113513	CU469464.1	44	2.87e-05	56.5
	contig_12429	62073	PUUG01000077.1	30	1.57e-05	56.5
	contig_1811	279623	PUUG01000077.1	30	7.08e-05	56.5
	contig_1965	242278	PUUG01000077.1	30	6.13e-05	56.5
	contig_3680	157887	PUUG01000077.1	30	4e-05	56.5
	contig_4624	191031	PUUG01000077.1	30	4.84e-05	56.5
	contig_6969	13344	PUUG01000077.1	30	3.37e-06	56.5
	contig_8281	282161	CU469464.1	30	7.14e-05	56.5
	contig_11373	140722	CP025121.1	36	0.000128	54.7
	contig_12528	20867	PUUG01000004.1	33	1.9e-05	54.7
	contig_12694	32010	PUUG01000077.1	29	2.91e-05	54.7
	contig_12988	292615	AVAO01000003.1	29	0.000266	54.7
	contig_1511	228041	PUUG01000077.1	29	0.000208	54.7
	contig_1922	76884	PUUG01000077.1	29	7e-05	54.7
	contig_3072	426234	JABUOH010000029.1	36	0.000388	54.7
	contig_4440	302104	PUUG01000077.1	29	0.000275	54.7
	contig_4550	126972	PUUG01000077.1	29	0.000116	54.7
	contig_4848	38199	PUUG01000077.1	29	3.48e-05	54.7
	contig_4907	16162	PUUG01000077.1	29	1.47e-05	54.7
	contig_5465	19392	PUUG01000077.1	29	1.76e-05	54.7
	contig_6545	227335	AVAO01000001.1	29	0.000207	54.7
	contig_6703	181785	JHUK01000001.1	29	0.000165	54.7
	contig_748	732149	CU469464.1	29	0.000667	54.7
	contig_7794	84836	PUUG01000077.1	29	7.72e-05	54.7
	contig_8108	256547	PUUG01000077.1	29	0.000234	54.7
	contig_8278	212039	JHUK01000002.1	29	0.000193	54.7
	contig_10254	48120	CU469464.1	31	0.000158	52.8
	contig_11779	150282	JHUK01000001.1	28	0.000492	52.8
	contig_1226	114044	PUUG01000077.1	28	0.000373	52.8
	contig_13647	66644	CP025121.1	28	0.000218	52.8
	contig_1824	764369	VWXM01000003.1	48	0.003	52.8
	contig_2094	319343	MWKN01000041.1	34	0.001	52.8
	contig_2207	184328	CP060385.1	28	0.000604	52.8
	contig_2913	48841	PUUG01000077.1	52	0.00016	52.8
	contig_3503	48784	QGKT01000001.1	28	0.00016	52.8
	contig_3901	386929	CP025121.1	28	0.001	52.8
	contig_3931	361108	CP002548.1	28	0.001	52.8
	contig_4086	241236	JACRYS010000014.1	28	0.00079	52.8
	contig_5110	32866	CU469464.1	32	0.000108	52.8
	contig_5544	107661	PUUG01000077.1	28	0.000353	52.8
	contig_5855	177726	JHUK01000001.1	28	0.000582	52.8
	contig_5972	86427	VWXM01000007.1	28	0.000283	52.8
	contig_6	293326	PUUG01000077.1	28	0.001	52.8
	contig_7175	69522	CU469464.1	28	0.000228	52.8
	contig_7303	92351	PUUG01000077.1	28	0.000302	52.8
	contig_8991	61966	PUUG01000077.1	28	0.000203	52.8
	contig_9504	73733	CP055264.1	28	0.000241	52.8
