# Supplementary material for: The Complete Genome of the “Flavescence Dorée” Phytoplasma Reveals Characteristics of Low Genome Plasticity
Source: Biology (Basel). 2022 Jun 23;11(7):953. doi: 10.3390/biology11070953 (PMC9312162; doi:10.3390/biology11070953)
Supplement: Supplementary file 1 [file biology-11-00953-s001.zip › Supplementary Table_S2.xlsx]

## Sheet: Functional annotations
#	Locus tag	Product	Gene ontology	Protein databases	Genome annotation databases	Family and domain databases	Crossreferences
1	FlDop_00001 Chromosomal replication initiator protein DnaA	Chromosomal replication initiator protein DnaA	GO:0003688 - DNA replication origin binding|GO:0005524 - ATP binding|GO:0005737 - cytoplasm|GO:0006270 - DNA replication initiation|GO:0006275 - regulation of DNA replication	Uniprot (A0A660HMB7)|Interpro (A0A660HMB7)	KEGG (pzi:CWO85_01360)|KEGG GM (pzi:CWO85_01360)	Interpro (IPR003593)|Interpro (IPR001957)|Interpro (IPR020591)|Interpro (IPR013317)|Interpro (IPR013159)|Interpro (IPR024633)|Interpro (IPR038454)|Interpro (IPR027417)|Interpro (IPR010921)|Pfam (PF00308)|Pfam (PF08299)|Pfam (PF11638)	EMBL (CP025121)
2	FlDop_00002 Beta sliding clamp	Beta sliding clamp	GO:0003677 - DNA binding|GO:0003887 - DNA-directed DNA polymerase activity|GO:0005737 - cytoplasm|GO:0006260 - DNA replication|GO:0008408 - 3'-5' exonuclease activity|GO:0009360 - DNA polymerase III complex	Uniprot (A0A660HMT6)|Interpro (A0A660HMT6)	KEGG (pzi:CWO85_01365)|KEGG GM (pzi:CWO85_01365)|KEGG EC (2.7.7.7)	Interpro (IPR001001)|Interpro (IPR022635)|Interpro (IPR022637)|Interpro (IPR022634)|Pfam (PF00712)|Pfam (PF02767)|Pfam (PF02768)	EMBL (CP025121)
3	FlDop_00003 hypothetical protein	Uncharacterized protein	GO:0016021 - integral component of membrane	Uniprot (A0A660HMC2)|Interpro (A0A660HMC2)	KEGG (pzi:CWO85_01370)|KEGG GM (pzi:CWO85_01370)		EMBL (CP025121)
4	FlDop_00004 Tryptophan--tRNA ligase	Tryptophan--tRNA ligase	GO:0004830 - tryptophan-tRNA ligase activity|GO:0005524 - ATP binding|GO:0006436 - tryptophanyl-tRNA aminoacylation	Uniprot (A0A660HNV0)|Interpro (A0A660HNV0)	KEGG (pzi:CWO85_01375)|KEGG GM (pzi:CWO85_01375)|KEGG EC (6.1.1.2)	Interpro (IPR001412)|Interpro (IPR002305)|Interpro (IPR014729)|Interpro (IPR002306)|Pfam (PF00579)	EMBL (CP025121)
5	FlDop_00005 hypothetical protein
6	FlDop_00006 NAD-dependent malic enzyme	NAD-dependent malic enzyme	GO:0004471 - malate dehydrogenase (decarboxylating) (NAD+) activity|GO:0046872 - metal ion binding|GO:0051287 - NAD binding	Uniprot (A0A660HMU6)|Interpro (A0A660HMU6)	KEGG (pzi:CWO85_01430)|KEGG GM (pzi:CWO85_01430)|KEGG EC (1.1.1.38)	Interpro (IPR012301)|Interpro (IPR037062)|Interpro (IPR012302)|Interpro (IPR045213)|Interpro (IPR001891)|Interpro (IPR036291)|Pfam (PF00390)|Pfam (PF03949)	EMBL (CP025121)
7	FlDop_00007 hypothetical protein	Uncharacterized protein		Uniprot (B3R0M9)|Interpro (B3R0M9)	KEGG (pml:ATP_00426)|KEGG GM (pml:ATP_00426)		NCBI (501496299)|EMBL (CU469464)
8	FlDop_00008 hypothetical protein	Uncharacterized protein	GO:0016021 - integral component of membrane	Uniprot (B3R0N0)|Interpro (B3R0N0)	KEGG (pml:ATP_00427)|KEGG GM (pml:ATP_00427)		NCBI (193807173)|EMBL (CU469464)
9	FlDop_00009 Putative TrmH family tRNA/rRNA methyltransferase	RNA methyltransferase	GO:0003723 - RNA binding|GO:0006396 - RNA processing|GO:0008173 - RNA methyltransferase activity	Uniprot (A0A660HML9)|Interpro (A0A660HML9)	KEGG (pzi:CWO85_01845)|KEGG GM (pzi:CWO85_01845)	Interpro (IPR029028)|Interpro (IPR029064)|Interpro (IPR001537)|Interpro (IPR029026)|Pfam (PF00588)	EMBL (CP025121)
10	FlDop_00010 hypothetical protein	Uncharacterized protein	GO:0005886 - plasma membrane|GO:0016021 - integral component of membrane	Uniprot (A0A660HMK8)|Interpro (A0A660HMK8)	KEGG (pzi:CWO85_01840)|KEGG GM (pzi:CWO85_01840)	Interpro (IPR003740)|Pfam (PF02588)	EMBL (CP025121)
11	FlDop_00011 30S ribosomal protein S6	30S ribosomal protein S6	GO:0003735 - structural constituent of ribosome|GO:0005737 - cytoplasm|GO:0005840 - ribosome|GO:0006412 - translation|GO:0019843 - rRNA binding	Uniprot (A0A660HMK3)|Interpro (A0A660HMK3)	KEGG (pzi:CWO85_01835)|KEGG GM (pzi:CWO85_01835)	Interpro (IPR000529)|Interpro (IPR020814)|Interpro (IPR035980)|Interpro (IPR014717)|Pfam (PF01250)	EMBL (CP025121)
12	FlDop_00012 Single-stranded DNA-binding protein A (ssb)	Single-stranded DNA-binding protein	GO:0003697 - single-stranded DNA binding|GO:0006260 - DNA replication	Uniprot (A0A660HMQ0)|Interpro (A0A660HMQ0)	KEGG (pzi:CWO85_01830)|KEGG GM (pzi:CWO85_01830)	Interpro (IPR012340)|Interpro (IPR000424)|Interpro (IPR011344)|Pfam (PF00436)	EMBL (CP025121)
13	FlDop_00013 30S ribosomal protein S18	30S ribosomal protein S18	GO:0003735 - structural constituent of ribosome|GO:0005737 - cytoplasm|GO:0005840 - ribosome|GO:0006412 - translation|GO:0019843 - rRNA binding	Uniprot (A0A660HMJ0)|Interpro (A0A660HMJ0)	KEGG (pzi:CWO85_01825)|KEGG GM (pzi:CWO85_01825)	Interpro (IPR001648)|Interpro (IPR036870)|Pfam (PF01084)	EMBL (CP025121)
14	FlDop_00014 Cyclic-di-AMP phosphodiesterase GdpP	50S ribosomal protein L9	GO:0003735 - structural constituent of ribosome|GO:0005840 - ribosome|GO:0006412 - translation|GO:0016021 - integral component of membrane|GO:0019843 - rRNA binding	Uniprot (A0A660HMJ5)|Interpro (A0A660HMJ5)	KEGG (pzi:CWO85_01820)|KEGG GM (pzi:CWO85_01820)|KEGG EC (3.1.4.59)	Interpro (IPR001667)|Interpro (IPR038763)|Interpro (IPR003156)|Interpro (IPR000160)|Interpro (IPR029787)|Interpro (IPR043128)|Interpro (IPR009027)|Interpro (IPR020594)|Interpro (IPR020069)|Interpro (IPR036791)|Interpro (IPR020070)|Interpro (IPR036935)|Pfam (PF01368)|Pfam (PF02272)|Pfam (PF03948)|Pfam (PF01281)	EMBL (CP025121)
15	FlDop_00015 Replicative DNA helicase (dnaB)	Replicative DNA helicase	GO:0003677 - DNA binding|GO:0003678 - DNA helicase activity|GO:0005524 - ATP binding|GO:0006269 - DNA replication synthesis of RNA primer|GO:0016887 - ATP hydrolysis activity|GO:1990077 - primosome complex	Uniprot (A0A660HN07)|Interpro (A0A660HN07)	KEGG (pzi:CWO85_01815)|KEGG GM (pzi:CWO85_01815)|KEGG EC (5.6.2.3)	Interpro (IPR003593)|Interpro (IPR036185)|Interpro (IPR007692)|Interpro (IPR007694)|Interpro (IPR007693)|Interpro (IPR016136)|Interpro (IPR027417)|Pfam (PF00772)|Pfam (PF03796)	EMBL (CP025121)
16	FlDop_00016 Peptide chain release factor RF1	Peptide chain release factor 1	GO:0003747 - translation release factor activity	Uniprot (A0A660HMK2)|Interpro (A0A660HMK2)	KEGG (pzi:CWO85_01810)|KEGG GM (pzi:CWO85_01810)	Interpro (IPR005139)|Interpro (IPR000352)|Interpro (IPR045853)|Pfam (PF03462)|Pfam (PF00472)	EMBL (CP025121)
17	FlDop_00017 Putative threonylcarbamoyl-AMP synthase	Threonylcarbamoyl-AMP synthase	GO:0003725 - double-stranded RNA binding	Uniprot (A0A660HMJ4)|Interpro (A0A660HMJ4)	KEGG (pzi:CWO85_01805)|KEGG GM (pzi:CWO85_01805)|KEGG EC (2.7.7.87)	Interpro (IPR017945)|Interpro (IPR006070)|Pfam (PF01300)	EMBL (CP025121)
18	FlDop_00018 DNA polymerase III subunit delta	DNA polymerase III subunit delta	GO:0003677 - DNA binding|GO:0003887 - DNA-directed DNA polymerase activity|GO:0006260 - DNA replication|GO:0009360 - DNA polymerase III complex	Uniprot (A0A660HNB1)|Interpro (A0A660HNB1)	KEGG (pzi:CWO85_01800)|KEGG GM (pzi:CWO85_01800)|KEGG EC (2.7.7.7)	Interpro (IPR010372)|Pfam (PF06144)	EMBL (CP025121)
19	FlDop_00019 Tyrosine recombinase XerD	Tyrosine recombinase XerC	GO:0003677 - DNA binding|GO:0005737 - cytoplasm|GO:0006313 - transposition DNA-mediated|GO:0007049 - cell cycle|GO:0007059 - chromosome segregation|GO:0009037 - tyrosine-based site-specific recombinase activity|GO:0051301 - cell division	Uniprot (A0A660HMK9)|Interpro (A0A660HMK9)	KEGG (pzi:CWO85_01795)|KEGG GM (pzi:CWO85_01795)	Interpro (IPR044068)|Interpro (IPR011010)|Interpro (IPR013762)|Interpro (IPR002104)|Interpro (IPR010998)|Interpro (IPR004107)|Interpro (IPR023009)|Pfam (PF02899)|Pfam (PF00589)	EMBL (CP025121)
20	FlDop_00020 hypothetical protein	Uncharacterized protein	GO:0005886 - plasma membrane|GO:0016021 - integral component of membrane	Uniprot (A0A660HMK0)|Interpro (A0A660HMK0)	KEGG (pzi:CWO85_01790)|KEGG GM (pzi:CWO85_01790)	Interpro (IPR003740)|Pfam (PF02588)	EMBL (CP025121)
21	FlDop_00021 Isoleucine--tRNA ligase	Isoleucine--tRNA ligase	GO:0000049 - tRNA binding|GO:0002161 - aminoacyl-tRNA editing activity|GO:0004822 - isoleucine-tRNA ligase activity|GO:0005524 - ATP binding|GO:0005737 - cytoplasm|GO:0006428 - isoleucyl-tRNA aminoacylation|GO:0008270 - zinc ion binding	Uniprot (A0A660HND2)|Interpro (A0A660HND2)	KEGG (pzi:CWO85_01785)|KEGG GM (pzi:CWO85_01785)|KEGG EC (6.1.1.5)	Interpro (IPR001412)|Interpro (IPR002300)|Interpro (IPR033708)|Interpro (IPR002301)|Interpro (IPR023585)|Interpro (IPR013155)|Interpro (IPR014729)|Interpro (IPR009080)|Interpro (IPR009008)|Pfam (PF08264)|Pfam (PF00133)	EMBL (CP025121)
22	FlDop_00022 Ribosome-binding ATPase YchF	Ribosome-binding ATPase YchF	GO:0005524 - ATP binding|GO:0005525 - GTP binding|GO:0016887 - ATP hydrolysis activity|GO:0043022 - ribosome binding|GO:0043023 - ribosomal large subunit binding	Uniprot (A0A660HMJ6)|Interpro (A0A660HMJ6)	KEGG (pzi:CWO85_01780)|KEGG GM (pzi:CWO85_01780)	Interpro (IPR004396)|Interpro (IPR012675)|Interpro (IPR031167)|Interpro (IPR006073)|Interpro (IPR027417)|Interpro (IPR012676)|Interpro (IPR023192)|Interpro (IPR013029)|Interpro (IPR041706)|Pfam (PF01926)|Pfam (PF06071)	EMBL (CP025121)
23	FlDop_00023 Variable membrane protein B	Variable membrane protein B	GO:0016021 - integral component of membrane	Uniprot (A0A4E9EPN4)|Interpro (A0A4E9EPN4)			EMBL (LR585965)
24	FlDop_00024 hypothetical protein	Uncharacterized protein	GO:0004252 - serine-type endopeptidase activity|GO:0016021 - integral component of membrane	Uniprot (A0A660HMH9)|Interpro (A0A660HMH9)	KEGG (pzi:CWO85_01705)|KEGG GM (pzi:CWO85_01705)	Interpro (IPR009003)|Interpro (IPR043504)|Interpro (IPR001940)	EMBL (CP025121)
25	FlDop_00025 Heat-inducible transcription repressor HrcA	Heat-inducible transcription repressor HrcA	GO:0003677 - DNA binding|GO:0045892 - negative regulation of transcription DNA-templated	Uniprot (A0A660HMH4)|Interpro (A0A660HMH4)	KEGG (pzi:CWO85_01700)|KEGG GM (pzi:CWO85_01700)	Interpro (IPR029016)|Interpro (IPR002571)|Interpro (IPR021153)|Interpro (IPR036388)|Interpro (IPR036390)|Interpro (IPR023120)|Pfam (PF01628)	EMBL (CP025121)
26	FlDop_00026 Protein GrpE	Protein GrpE	GO:0000774 - adenyl-nucleotide exchange factor activity|GO:0005737 - cytoplasm|GO:0006457 - protein folding|GO:0042803 - protein homodimerization activity|GO:0051087 - chaperone binding	Uniprot (A0A660HN92)|Interpro (A0A660HN92)	KEGG (pzi:CWO85_01695)|KEGG GM (pzi:CWO85_01695)	Interpro (IPR000740)|Interpro (IPR013805)|Interpro (IPR009012)|Pfam (PF01025)	EMBL (CP025121)
27	FlDop_00027 Chaperone protein DnaK	Chaperone protein DnaK	GO:0005524 - ATP binding|GO:0006457 - protein folding|GO:0016887 - ATP hydrolysis activity|GO:0051082 - unfolded protein binding	Uniprot (A0A660HMI9)|Interpro (A0A660HMI9)	KEGG (pzi:CWO85_01690)|KEGG GM (pzi:CWO85_01690)	Interpro (IPR043129)|Interpro (IPR012725)|Interpro (IPR018181)|Interpro (IPR029048)|Interpro (IPR029047)|Interpro (IPR013126)|Pfam (PF00012)	EMBL (CP025121)
28	FlDop_00028 Chaperone protein DnaJ	Chaperone protein DnaJ	GO:0005524 - ATP binding|GO:0005737 - cytoplasm|GO:0006260 - DNA replication|GO:0006457 - protein folding|GO:0008270 - zinc ion binding|GO:0009408 - response to heat|GO:0031072 - heat shock protein binding|GO:0051082 - unfolded protein binding	Uniprot (A0A660HMI2)|Interpro (A0A660HMI2)	KEGG (pzi:CWO85_01685)|KEGG GM (pzi:CWO85_01685)	Interpro (IPR012724)|Interpro (IPR002939)|Interpro (IPR001623)|Interpro (IPR018253)|Interpro (IPR008971)|Interpro (IPR001305)|Interpro (IPR036410)|Interpro (IPR036869)|Pfam (PF00226)|Pfam (PF01556)|Pfam (PF00684)	EMBL (CP025121)
29	FlDop_00029 Lipoate-protein ligase LplJ	Lipoate--protein ligase	GO:0005524 - ATP binding|GO:0009249 - protein lipoylation|GO:0016979 - lipoate-protein ligase activity	Uniprot (A0A660HMH6)|Interpro (A0A660HMH6)	KEGG (pzi:CWO85_01680)|KEGG GM (pzi:CWO85_01680)|KEGG EC (6.3.1.20)	Interpro (IPR045864)|Interpro (IPR004143)|Interpro (IPR019491)|Interpro (IPR004562)|Pfam (PF03099)|Pfam (PF10437)	EMBL (CP025121)
30	FlDop_00030 ABC transporter ATP-binding protein YxdL	Lipoprotein ABC transporter ATP-binding protein	GO:0005524 - ATP binding|GO:0016021 - integral component of membrane	Uniprot (A0A660HMF6)|Interpro (A0A660HMF6)	KEGG (pzi:CWO85_01670)|KEGG GM (pzi:CWO85_01670)	Interpro (IPR003593)|Interpro (IPR003439)|Interpro (IPR017871)|Interpro (IPR017911)|Interpro (IPR027417)|Pfam (PF00005)	EMBL (CP025121)
31	FlDop_00031 Putative NAD(P)H nitroreductase YodC	Nitroreductase	GO:0016491 - oxidoreductase activity	Uniprot (A0A660HMG6)|Interpro (A0A660HMG6)	KEGG (pzi:CWO85_01665)|KEGG GM (pzi:CWO85_01665)	Interpro (IPR029479)|Interpro (IPR000415)|Pfam (PF00881)	EMBL (CP025121)
32	FlDop_00032 Threonine--tRNA ligase	Threonine--tRNA ligase	GO:0000049 - tRNA binding|GO:0004829 - threonine-tRNA ligase activity|GO:0005524 - ATP binding|GO:0005737 - cytoplasm|GO:0006435 - threonyl-tRNA aminoacylation|GO:0046872 - metal ion binding	Uniprot (A0A660HMY1)|Interpro (A0A660HMY1)	KEGG (pzi:CWO85_01660)|KEGG GM (pzi:CWO85_01660)|KEGG EC (6.1.1.3)	Interpro (IPR002314)|Interpro (IPR006195)|Interpro (IPR045864)|Interpro (IPR004154)|Interpro (IPR036621)|Interpro (IPR012675)|Interpro (IPR004095)|Interpro (IPR012676)|Interpro (IPR002320)|Interpro (IPR018163)|Interpro (IPR033728)|Pfam (PF03129)|Pfam (PF00587)	EMBL (CP025121)
33	FlDop_00033 tRNA modification GTPase MnmE	tRNA modification GTPase MnmE	GO:0003924 - GTPase activity|GO:0005525 - GTP binding|GO:0005737 - cytoplasm|GO:0006400 - tRNA modification|GO:0046872 - metal ion binding	Uniprot (A0A660HMG8)|Interpro (A0A660HMG8)	KEGG (pzi:CWO85_01655)|KEGG GM (pzi:CWO85_01655)	Interpro (IPR031168)|Interpro (IPR006073)|Interpro (IPR018948)|Interpro (IPR004520)|Interpro (IPR027368)|Interpro (IPR025867)|Interpro (IPR027417)|Interpro (IPR005225)|Interpro (IPR027266)|Pfam (PF01926)|Pfam (PF12631)|Pfam (PF10396)	EMBL (CP025121)
34	FlDop_00034 Bifunctional oligoribonuclease and PAP phosphatase NrnA	Bifunctional oligoribonuclease/PAP phosphatase NrnA	GO:0003676 - nucleic acid binding	Uniprot (A0A660HMG7)|Interpro (A0A660HMG7)	KEGG (pzi:CWO85_01650)|KEGG GM (pzi:CWO85_01650)|KEGG EC (3.1.3.7)	Interpro (IPR001667)|Interpro (IPR038763)|Interpro (IPR003156)|Pfam (PF01368)|Pfam (PF02272)	EMBL (CP025121)
35	FlDop_00035 sn-glycerol-3-phosphate-binding periplasmic protein UgpB	Uncharacterized protein	GO:0016021 - integral component of membrane	Uniprot (A0A660HMZ4)|Interpro (A0A660HMZ4)	KEGG (pzi:CWO85_02785)|KEGG GM (pzi:CWO85_02785)	Interpro (IPR006059)|Pfam (PF13416)	EMBL (CP025121)
36	FlDop_00036 L-arabinose transport system permease protein AraQ (malG)	Carbohydrate ABC transporter permease	GO:0005886 - plasma membrane|GO:0016021 - integral component of membrane|GO:0055085 - transmembrane transport	Uniprot (A0A660HMH8)|Interpro (A0A660HMH8)	KEGG (pzi:CWO85_01640)|KEGG GM (pzi:CWO85_01640)	Interpro (IPR000515)|Interpro (IPR035906)|Pfam (PF00528)	EMBL (CP025121)
37	FlDop_00037 Lactose transport system permease protein LacF (malF)	Sugar ABC transporter permease	GO:0005886 - plasma membrane|GO:0016021 - integral component of membrane|GO:0055085 - transmembrane transport	Uniprot (A0A660HMH2)|Interpro (A0A660HMH2)	KEGG (pzi:CWO85_01635)|KEGG GM (pzi:CWO85_01635)	Interpro (IPR000515)|Interpro (IPR035906)|Pfam (PF00528)	EMBL (CP025121)
38	FlDop_00038 sn-glycerol-3-phosphate import ATP-binding protein UgpC	ABC transporter ATP-binding protein	GO:0005524 - ATP binding|GO:0005886 - plasma membrane|GO:0015408 - ABC-type ferric iron transporter activity	Uniprot (A0A660HMG5)|Interpro (A0A660HMG5)	KEGG (pzi:CWO85_01630)|KEGG GM (pzi:CWO85_01630)	Interpro (IPR003593)|Interpro (IPR003439)|Interpro (IPR017871)|Interpro (IPR015853)|Interpro (IPR027417)|Pfam (PF00005)	EMBL (CP025121)
39	FlDop_00039 Asparagine--tRNA ligase	Asparagine--tRNA ligase	GO:0004816 - asparagine-tRNA ligase activity|GO:0005524 - ATP binding|GO:0005737 - cytoplasm|GO:0006421 - asparaginyl-tRNA aminoacylation	Uniprot (A0A660HML0)|Interpro (A0A660HML0)	KEGG (pzi:CWO85_01625)|KEGG GM (pzi:CWO85_01625)|KEGG EC (6.1.1.22)	Interpro (IPR004364)|Interpro (IPR006195)|Interpro (IPR045864)|Interpro (IPR004522)|Interpro (IPR002312)|Interpro (IPR012340)|Pfam (PF00152)	EMBL (CP025121)
40	FlDop_00040 Exodeoxyribonuclease 7 large subunit	Exonuclease VII large subunit	GO:0006308 - DNA catabolic process|GO:0008855 - exodeoxyribonuclease VII activity|GO:0009318 - exodeoxyribonuclease VII complex	Uniprot (B3R0Q8)|Interpro (B3R0Q8)	KEGG (pml:ATP_00455)|KEGG GM (pml:ATP_00455)|KEGG EC (3.1.11.6)	Interpro (IPR003753)|Interpro (IPR020579)|Pfam (PF02601)	NCBI (501496325)|EMBL (CU469464)
41	FlDop_00041 hypothetical protein (htmp2)	Uncharacterized protein	GO:0016021 - integral component of membrane	Uniprot (A0A660HMF9)|Interpro (A0A660HMF9)	KEGG (pzi:CWO85_01615)|KEGG GM (pzi:CWO85_01615)		EMBL (CP025121)
42	FlDop_00042 Glucose-6-phosphate isomerase	Glucose-6-phosphate isomerase	GO:0004347 - glucose-6-phosphate isomerase activity|GO:0005737 - cytoplasm|GO:0006094 - gluconeogenesis|GO:0006096 - glycolytic process	Uniprot (A0A660HMW7)|Interpro (A0A660HMW7)	KEGG (pzi:CWO85_01610)|KEGG GM (pzi:CWO85_01610)|KEGG EC (5.3.1.9)	Interpro (IPR001672)|Interpro (IPR018189)|Interpro (IPR035476)|Interpro (IPR035482)|Pfam (PF00342)	EMBL (CP025121)
43	FlDop_00043 MATE family efflux transporter	Sodium transporter	GO:0015297 - antiporter activity|GO:0016021 - integral component of membrane|GO:0042910 - xenobiotic transmembrane transporter activity	Uniprot (A0A660HMG0)|Interpro (A0A660HMG0)	KEGG (pzi:CWO85_01605)|KEGG GM (pzi:CWO85_01605)	Interpro (IPR002528)|Pfam (PF01554)	EMBL (CP025121)
44	FlDop_00044 Primosomal protein N'	Primosomal protein N'	GO:0003677 - DNA binding|GO:0003678 - DNA helicase activity|GO:0005524 - ATP binding|GO:0006268 - DNA unwinding involved in DNA replication|GO:0006269 - DNA replication synthesis of RNA primer|GO:0008270 - zinc ion binding|GO:0016787 - hydrolase activity|GO:1990077 - primosome complex	Uniprot (A0A660HMF7)|Interpro (A0A660HMF7)	KEGG (pzi:CWO85_01600)|KEGG GM (pzi:CWO85_01600)	Interpro (IPR014001)|Interpro (IPR027417)|Interpro (IPR005259)|Interpro (IPR041222)|Interpro (IPR042115)|Pfam (PF17764)	EMBL (CP025121)
45	FlDop_00045 Ribosome-binding factor A	Ribosome-binding factor A	GO:0005737 - cytoplasm|GO:0030490 - maturation of SSU-rRNA	Uniprot (A0A660HN73)|Interpro (A0A660HN73)	KEGG (pzi:CWO85_01595)|KEGG GM (pzi:CWO85_01595)	Interpro (IPR015946)|Interpro (IPR000238)|Interpro (IPR023799)|Interpro (IPR020053)|Pfam (PF02033)	EMBL (CP025121)
46	FlDop_00046 Translation initiation factor IF-2	Translation initiation factor IF-2	GO:0003743 - translation initiation factor activity|GO:0003924 - GTPase activity|GO:0005525 - GTP binding|GO:0005737 - cytoplasm	Uniprot (A0A660HMH1)|Interpro (A0A660HMH1)	KEGG (pzi:CWO85_01590)|KEGG GM (pzi:CWO85_01590)	Interpro (IPR044145)|Interpro (IPR006847)|Interpro (IPR027417)|Interpro (IPR005225)|Interpro (IPR000795)|Interpro (IPR000178)|Interpro (IPR015760)|Interpro (IPR023115)|Interpro (IPR036925)|Interpro (IPR009000)|Pfam (PF00009)|Pfam (PF11987)|Pfam (PF04760)	EMBL (CP025121)
47	FlDop_00047 Transcription termination/antitermination protein NusA	Transcription termination factor NusA	GO:0003700 - DNA-binding transcription factor activity|GO:0003723 - RNA binding|GO:0005737 - cytoplasm|GO:0006353 - DNA-templated transcription termination|GO:0031564 - transcription antitermination	Uniprot (A0A660HMG1)|Interpro (A0A660HMG1)	KEGG (pzi:CWO85_01585)|KEGG GM (pzi:CWO85_01585)	Interpro (IPR015946)|Interpro (IPR025249)|Interpro (IPR009019)|Interpro (IPR012340)|Interpro (IPR030842)|Interpro (IPR036555)|Interpro (IPR022967)|Interpro (IPR013735)|Interpro (IPR010213)|Pfam (PF13184)|Pfam (PF08529)	EMBL (CP025121)
48	FlDop_00048 hypothetical protein
49	FlDop_00049 hypothetical protein
50	FlDop_00050 DNA polymerase III PolC-type	DNA polymerase III PolC-type	GO:0003677 - DNA binding|GO:0003887 - DNA-directed DNA polymerase activity|GO:0005737 - cytoplasm|GO:0006261 - DNA-templated DNA replication|GO:0008408 - 3'-5' exonuclease activity	Uniprot (A0A660HMK5)|Interpro (A0A660HMK5)	KEGG (pzi:CWO85_01855)|KEGG GM (pzi:CWO85_01855)|KEGG EC (2.7.7.7)	Interpro (IPR011708)|Interpro (IPR040982)|Interpro (IPR029460)|Interpro (IPR006054)|Interpro (IPR013520)|Interpro (IPR004013)|Interpro (IPR003141)|Interpro (IPR006308)|Interpro (IPR044923)|Interpro (IPR012337)|Interpro (IPR036397)|Pfam (PF07733)|Pfam (PF17657)|Pfam (PF14579)|Pfam (PF02811)|Pfam (PF00929)	EMBL (CP025121)
51	FlDop_00051 NADH oxidase	NADH oxidase	GO:0016491 - oxidoreductase activity|GO:0045454 - cell redox homeostasis|GO:0050660 - flavin adenine dinucleotide binding	Uniprot (A0A660HML3)|Interpro (A0A660HML3)	KEGG (pzi:CWO85_01860)|KEGG GM (pzi:CWO85_01860)	Interpro (IPR036188)|Interpro (IPR023753)|Interpro (IPR016156)|Interpro (IPR004099)|Pfam (PF07992)|Pfam (PF02852)	EMBL (CP025121)
52	FlDop_00052 Protein translocase subunit SecA	Protein translocase subunit SecA	GO:0005524 - ATP binding|GO:0005737 - cytoplasm|GO:0005886 - plasma membrane|GO:0006605 - protein targeting|GO:0017038 - protein import|GO:0065002 - intracellular protein transmembrane transport	Uniprot (A0A660HNL2)|Interpro (A0A660HNL2)	KEGG (pzi:CWO85_01865)|KEGG GM (pzi:CWO85_01865)|KEGG EC (7.4.2.8)	Interpro (IPR014001)|Interpro (IPR001650)|Interpro (IPR027417)|Interpro (IPR000185)|Interpro (IPR020937)|Interpro (IPR011115)|Interpro (IPR014018)|Interpro (IPR011130)|Interpro (IPR044722)|Interpro (IPR011116)|Interpro (IPR036266)|Interpro (IPR036670)|Pfam (PF07517)|Pfam (PF01043)|Pfam (PF07516)	EMBL (CP025121)
53	FlDop_00053 Peptide chain release factor 2	Peptide chain release factor 2	GO:0005737 - cytoplasm|GO:0016149 - translation release factor activity codon specific	Uniprot (A0A660HN17)|Interpro (A0A660HN17)	KEGG (pzi:CWO85_01870)|KEGG GM (pzi:CWO85_01870)	Interpro (IPR005139)|Interpro (IPR000352)|Interpro (IPR045853)|Interpro (IPR004374)|Pfam (PF03462)|Pfam (PF00472)	EMBL (CP025121)
54	FlDop_00054 hypothetical protein	Uncharacterized protein	GO:0005886 - plasma membrane|GO:0016021 - integral component of membrane	Uniprot (A0A660HMK4)|Interpro (A0A660HMK4)	KEGG (pzi:CWO85_01875)|KEGG GM (pzi:CWO85_01875)	Interpro (IPR003740)|Pfam (PF02588)	EMBL (CP025121)
55	FlDop_00055 Glutamine-dependent NAD(+) synthetase	Glutamine-dependent NAD(+) synthetase	GO:0003952 - NAD+ synthase (glutamine-hydrolyzing) activity|GO:0004359 - glutaminase activity|GO:0005524 - ATP binding|GO:0005737 - cytoplasm|GO:0009435 - NAD biosynthetic process	Uniprot (A0A660HMJ9)|Interpro (A0A660HMJ9)	KEGG (pzi:CWO85_01880)|KEGG GM (pzi:CWO85_01880)|KEGG EC (6.3.5.1)	Interpro (IPR003010)|Interpro (IPR036526)|Interpro (IPR014445)|Interpro (IPR041856)|Interpro (IPR003694)|Pfam (PF00795)	EMBL (CP025121)
56	FlDop_00056 tRNA-specific 2-thiouridylase MnmA	tRNA-specific 2-thiouridylase MnmA	GO:0000049 - tRNA binding|GO:0005524 - ATP binding|GO:0005737 - cytoplasm|GO:0006400 - tRNA modification|GO:0016783 - sulfurtransferase activity	Uniprot (A0A660HMQ8)|Interpro (A0A660HMQ8)	KEGG (pzi:CWO85_01885)|KEGG GM (pzi:CWO85_01885)|KEGG EC (2.8.1.13)	Interpro (IPR023382)|Interpro (IPR014729)|Interpro (IPR004506)	EMBL (CP025121)
57	FlDop_00057 GTP pyrophosphokinase	(P)ppGpp synthetase	GO:0015969 - guanosine tetraphosphate metabolic process	Uniprot (A0A660HML6)|Interpro (A0A660HML6)	KEGG (pzi:CWO85_01890)|KEGG GM (pzi:CWO85_01890)|KEGG EC (2.7.6.5)	Interpro (IPR012675)|Interpro (IPR003607)|Interpro (IPR006674)|Interpro (IPR043519)|Interpro (IPR004811)|Interpro (IPR007685)|Interpro (IPR004095)|Interpro (IPR012676)|Interpro (IPR033655)|Pfam (PF04607)|Pfam (PF02824)	EMBL (CP025121)
58	FlDop_00058 Histidine--tRNA ligase	Histidine--tRNA ligase	GO:0004821 - histidine-tRNA ligase activity|GO:0005524 - ATP binding|GO:0005737 - cytoplasm|GO:0006427 - histidyl-tRNA aminoacylation	Uniprot (A0A660HND5)|Interpro (A0A660HND5)	KEGG (pzi:CWO85_01895)|KEGG GM (pzi:CWO85_01895)|KEGG EC (6.1.1.21)	Interpro (IPR006195)|Interpro (IPR045864)|Interpro (IPR004154)|Interpro (IPR036621)|Interpro (IPR015807)|Interpro (IPR041715)|Interpro (IPR004516)|Pfam (PF03129)|Pfam (PF13393)	EMBL (CP025121)
59	FlDop_00059 Aspartate--tRNA ligase	Aspartate--tRNA ligase	GO:0003676 - nucleic acid binding|GO:0004815 - aspartate-tRNA ligase activity|GO:0005524 - ATP binding|GO:0005737 - cytoplasm|GO:0006422 - aspartyl-tRNA aminoacylation	Uniprot (A0A660HML8)|Interpro (A0A660HML8)	KEGG (pzi:CWO85_01900)|KEGG GM (pzi:CWO85_01900)|KEGG EC (6.1.1.12)	Interpro (IPR004364)|Interpro (IPR006195)|Interpro (IPR045864)|Interpro (IPR004524)|Interpro (IPR002312)|Interpro (IPR004115)|Interpro (IPR012340)|Interpro (IPR004365)|Pfam (PF00152)|Pfam (PF01336)	EMBL (CP025121)
60	FlDop_00060 tRNA(Ile)-lysidine synthase	tRNA(Ile)-lysidine synthase	GO:0005524 - ATP binding|GO:0005737 - cytoplasm|GO:0006400 - tRNA modification|GO:0016879 - ligase activity forming carbon-nitrogen bonds	Uniprot (A0A660HMN0)|Interpro (A0A660HMN0)	KEGG (pzi:CWO85_01905)|KEGG GM (pzi:CWO85_01905)|KEGG EC (6.3.4.19)	Interpro (IPR012796)|Interpro (IPR014729)|Interpro (IPR011063)|Interpro (IPR012094)|Interpro (IPR012795)|Pfam (PF01171)|Pfam (PF11734)	EMBL (CP025121)
61	FlDop_00061 hypothetical protein	Uncharacterized protein	GO:0016021 - integral component of membrane	Uniprot (A0A660HNC9)|Interpro (A0A660HNC9)	KEGG (pzi:CWO85_01910)|KEGG GM (pzi:CWO85_01910)		EMBL (CP025121)
62	FlDop_00062 Ribosome biogenesis GTPase A	Ribosome biogenesis GTPase A	GO:0005525 - GTP binding|GO:0005737 - cytoplasm	Uniprot (A0A660HML4)|Interpro (A0A660HML4)	KEGG (pzi:CWO85_01915)|KEGG GM (pzi:CWO85_01915)	Interpro (IPR006073)|Interpro (IPR023179)|Interpro (IPR019991)|Interpro (IPR016478)|Interpro (IPR027417)|Pfam (PF01926)	EMBL (CP025121)
63	FlDop_00063 DNA topoisomerase 1	DNA topoisomerase 1	GO:0003677 - DNA binding|GO:0003917 - DNA topoisomerase type I (single strand cut ATP-independent) activity|GO:0005694 - chromosome|GO:0006265 - DNA topological change|GO:0046872 - metal ion binding	Uniprot (A0A660HMM4)|Interpro (A0A660HMM4)	KEGG (pzi:CWO85_01920)|KEGG GM (pzi:CWO85_01920)|KEGG EC (5.6.2.1)	Interpro (IPR000380)|Interpro (IPR003601)|Interpro (IPR023406)|Interpro (IPR013497)|Interpro (IPR013824)|Interpro (IPR013825)|Interpro (IPR013826)|Interpro (IPR023405)|Interpro (IPR003602)|Interpro (IPR013498)|Interpro (IPR005733)|Interpro (IPR028612)|Interpro (IPR006171)|Pfam (PF01131)|Pfam (PF01751)|Pfam (PF01396)	EMBL (CP025121)
64	FlDop_00064 Signal recognition particle receptor FtsY	Signal recognition particle-docking protein FtsY	GO:0005525 - GTP binding|GO:0006614 - SRP-dependent cotranslational protein targeting to membrane|GO:0016020 - membrane	Uniprot (A0A660HN26)|Interpro (A0A660HN26)	KEGG (pzi:CWO85_01925)|KEGG GM (pzi:CWO85_01925)	Interpro (IPR003593)|Interpro (IPR027417)|Interpro (IPR013822)|Interpro (IPR004390)|Interpro (IPR036225)|Interpro (IPR000897)|Interpro (IPR042101)|Pfam (PF00448)|Pfam (PF02881)	EMBL (CP025121)
65	FlDop_00065 Signal recognition particle protein (ffh)	Signal recognition particle protein	GO:0003924 - GTPase activity|GO:0005525 - GTP binding|GO:0006614 - SRP-dependent cotranslational protein targeting to membrane|GO:0008312 - 7S RNA binding|GO:0048500 - signal recognition particle	Uniprot (A0A660HML1)|Interpro (A0A660HML1)	KEGG (pzi:CWO85_01930)|KEGG GM (pzi:CWO85_01930)|KEGG EC (3.6.5.4)	Interpro (IPR003593)|Interpro (IPR027417)|Interpro (IPR036891)|Interpro (IPR013822)|Interpro (IPR004125)|Interpro (IPR004780)|Interpro (IPR036225)|Interpro (IPR022941)|Interpro (IPR000897)|Interpro (IPR042101)|Pfam (PF00448)|Pfam (PF02881)|Pfam (PF02978)	EMBL (CP025121)
66	FlDop_00066 DNA polymerase I	Flap endonuclease	GO:0003677 - DNA binding|GO:0017108 - 5'-flap endonuclease activity|GO:0033567 - DNA replication Okazaki fragment processing	Uniprot (A0A660HMK7)|Interpro (A0A660HMK7)	KEGG (pzi:CWO85_01935)|KEGG GM (pzi:CWO85_01935)|KEGG EC (2.7.7.7)	Interpro (IPR020046)|Interpro (IPR002421)|Interpro (IPR036279)|Interpro (IPR020045)|Interpro (IPR038969)|Interpro (IPR008918)|Interpro (IPR029060)|Pfam (PF01367)|Pfam (PF02739)	EMBL (CP025121)
67	FlDop_00067 ATP-dependent zinc metalloprotease FtsH	AAA domain-containing protein	GO:0004176 - ATP-dependent peptidase activity|GO:0004222 - metalloendopeptidase activity|GO:0005524 - ATP binding|GO:0005886 - plasma membrane|GO:0016021 - integral component of membrane|GO:0016887 - ATP hydrolysis activity	Uniprot (A0A660HMR8)|Interpro (A0A660HMR8)	KEGG (pzi:CWO85_01940)|KEGG GM (pzi:CWO85_01940)	Interpro (IPR003593)|Interpro (IPR003959)|Interpro (IPR027417)|Interpro (IPR000642)|Interpro (IPR037219)|Pfam (PF00004)|Pfam (PF01434)	EMBL (CP025121)
68	FlDop_00068 Phosphate propanoyltransferase	Phosphate acyltransferase PduL	GO:0016747 - acyltransferase activity transferring groups other than amino-acyl groups|GO:0051144 - propanediol catabolic process	Uniprot (A0A660HMM2)|Interpro (A0A660HMM2)	KEGG (pzi:CWO85_01945)|KEGG GM (pzi:CWO85_01945)|KEGG EC (2.3.1.8)	Interpro (IPR008300)|Pfam (PF06130)	EMBL (CP025121)
69	FlDop_00069 hypothetical protein	Phosphohydrolase	GO:0016787 - hydrolase activity	Uniprot (A0A660HNG7)|Interpro (A0A660HNG7)	KEGG (pzi:CWO85_01950)|KEGG GM (pzi:CWO85_01950)	Interpro (IPR003607)|Interpro (IPR045509)|Interpro (IPR006674)|Pfam (PF01966)|Pfam (PF19276)	EMBL (CP025121)
70	FlDop_00070 Ribosomal RNA small subunit methyltransferase A	Ribosomal RNA small subunit methyltransferase A	GO:0003723 - RNA binding|GO:0005737 - cytoplasm|GO:0052908 - 16S rRNA (adenine(1518)-N(6)/adenine(1519)-N(6))-dimethyltransferase activity	Uniprot (A0A660HMM8)|Interpro (A0A660HMM8)	KEGG (pzi:CWO85_01955)|KEGG GM (pzi:CWO85_01955)|KEGG EC (2.1.1.182)	Interpro (IPR001737)|Interpro (IPR023165)|Interpro (IPR020596)|Interpro (IPR020598)|Interpro (IPR011530)|Interpro (IPR029063)|Pfam (PF00398)	EMBL (CP025121)
71	FlDop_00071 Putative septation protein SpoVG	Septation protein SpoVG	GO:0000917 - division septum assembly|GO:0030435 - sporulation resulting in formation of a cellular spore	Uniprot (A0A660HNG4)|Interpro (A0A660HNG4)	KEGG (pzi:CWO85_01965)|KEGG GM (pzi:CWO85_01965)	Interpro (IPR007170)|Interpro (IPR036751)|Pfam (PF04026)	EMBL (CP025121)
72	FlDop_00072 Zinc-transporting ATPase	Heavy metal translocating P-type ATPase	GO:0005524 - ATP binding|GO:0005886 - plasma membrane|GO:0016021 - integral component of membrane|GO:0019829 - ATPase-coupled cation transmembrane transporter activity|GO:0046872 - metal ion binding	Uniprot (A0A660HMP0)|Interpro (A0A660HMP0)	KEGG (pzi:CWO85_01970)|KEGG GM (pzi:CWO85_01970)|KEGG EC (7.2.2.12)	Interpro (IPR023299)|Interpro (IPR018303)|Interpro (IPR023298)|Interpro (IPR008250)|Interpro (IPR036412)|Interpro (IPR023214)|Interpro (IPR027256)|Interpro (IPR001757)|Interpro (IPR044492)	EMBL (CP025121)
73	FlDop_00073 hypothetical protein	Uncharacterized protein		Uniprot (A0A660HMP2)|Interpro (A0A660HMP2)	KEGG (pzi:CWO85_02140)|KEGG GM (pzi:CWO85_02140)		EMBL (CP025121)
74	FlDop_00074 Variable membrane protein A	Variable membrane protein A	GO:0016021 - integral component of membrane	Uniprot (A0A0D6DTS2)|Interpro (A0A0D6DTS2)			NCBI (773554307)|EMBL (LN680870)
75	FlDop_00090 hypothetical protein	Uncharacterized protein		Uniprot (A0A660HMV1)|Interpro (A0A660HMV1)	KEGG (pzi:CWO85_02230)|KEGG GM (pzi:CWO85_02230)		EMBL (CP025121)
76	FlDop_00091 Inorganic pyrophosphatase	Inorganic pyrophosphatase	GO:0000287 - magnesium ion binding|GO:0004427 - inorganic diphosphatase activity|GO:0005737 - cytoplasm|GO:0006796 - phosphate-containing compound metabolic process	Uniprot (A0A660HMQ4)|Interpro (A0A660HMQ4)	KEGG (pzi:CWO85_02235)|KEGG GM (pzi:CWO85_02235)|KEGG EC (3.6.1.1)	Interpro (IPR008162)|Interpro (IPR036649)|Pfam (PF00719)	EMBL (CP025121)
77	FlDop_00092 SsrA-binding protein	SsrA-binding protein	GO:0003723 - RNA binding|GO:0005737 - cytoplasm|GO:0070929 - trans-translation	Uniprot (A0A660HMQ9)|Interpro (A0A660HMQ9)	KEGG (pzi:CWO85_02240)|KEGG GM (pzi:CWO85_02240)	Interpro (IPR023620)|Interpro (IPR000037)|Interpro (IPR020081)|Pfam (PF01668)	EMBL (CP025121)
78	FlDop_00093 hypothetical protein	Uncharacterized protein	GO:0016021 - integral component of membrane	Uniprot (A0A660HMR5)|Interpro (A0A660HMR5)	KEGG (pzi:CWO85_02245)|KEGG GM (pzi:CWO85_02245)		EMBL (CP025121)
79	FlDop_00094 Enolase	Enolase	GO:0000015 - phosphopyruvate hydratase complex|GO:0000287 - magnesium ion binding|GO:0004634 - phosphopyruvate hydratase activity|GO:0005576 - extracellular region|GO:0006096 - glycolytic process|GO:0009986 - cell surface	Uniprot (A0A660HNG3)|Interpro (A0A660HNG3)	KEGG (pzi:CWO85_02250)|KEGG GM (pzi:CWO85_02250)|KEGG EC (4.2.1.11)	Interpro (IPR000941)|Interpro (IPR036849)|Interpro (IPR029017)|Interpro (IPR020810)|Interpro (IPR020809)|Interpro (IPR020811)|Pfam (PF00113)|Pfam (PF03952)	EMBL (CP025121)
80	FlDop_00095 23-bisphosphoglycerate-independent phosphoglycerate mutase	23-bisphosphoglycerate-independent phosphoglycerate mutase	GO:0005737 - cytoplasm|GO:0006007 - glucose catabolic process|GO:0006096 - glycolytic process|GO:0030145 - manganese ion binding|GO:0046537 - 23-bisphosphoglycerate-independent phosphoglycerate mutase activity	Uniprot (A0A660HMQ2)|Interpro (A0A660HMQ2)	KEGG (pzi:CWO85_02255)|KEGG GM (pzi:CWO85_02255)|KEGG EC (5.4.2.12)	Interpro (IPR017850)|Interpro (IPR011258)|Interpro (IPR006124)|Interpro (IPR036646)|Interpro (IPR005995)|Pfam (PF06415)|Pfam (PF01676)	EMBL (CP025121)
81	FlDop_00096 ATP-dependent 6-phosphofructokinase isozyme 1	ATP-dependent 6-phosphofructokinase	GO:0003872 - 6-phosphofructokinase activity|GO:0005524 - ATP binding|GO:0005737 - cytoplasm|GO:0006002 - fructose 6-phosphate metabolic process|GO:0046872 - metal ion binding	Uniprot (A0A660HMR3)|Interpro (A0A660HMR3)	KEGG (pzi:CWO85_02260)|KEGG GM (pzi:CWO85_02260)|KEGG EC (2.7.1.11)	Interpro (IPR022953)|Interpro (IPR012003)|Interpro (IPR000023)|Interpro (IPR035966)|Pfam (PF00365)	EMBL (CP025121)
82	FlDop_00097 Phosphoglycerate kinase	Phosphoglycerate kinase	GO:0004618 - phosphoglycerate kinase activity|GO:0005524 - ATP binding|GO:0005737 - cytoplasm|GO:0006096 - glycolytic process	Uniprot (A0A660HN68)|Interpro (A0A660HN68)	KEGG (pzi:CWO85_02265)|KEGG GM (pzi:CWO85_02265)|KEGG EC (2.7.2.3)	Interpro (IPR001576)|Interpro (IPR015824)|Interpro (IPR036043)|Pfam (PF00162)	EMBL (CP025121)
83	FlDop_00098 Glyceraldehyde-3-phosphate dehydrogenase	Glyceraldehyde-3-phosphate dehydrogenase	GO:0006006 - glucose metabolic process|GO:0016620 - oxidoreductase activity acting on the aldehyde or oxo group of donors NAD or NADP as acceptor|GO:0050661 - NADP binding|GO:0051287 - NAD binding	Uniprot (B2CZ86)|Interpro (B2CZ86)		Interpro (IPR020831)|Interpro (IPR020830)|Interpro (IPR020829)|Interpro (IPR020828)|Interpro (IPR006424)|Interpro (IPR036291)|Pfam (PF02800)|Pfam (PF00044)	NCBI (171473205)|EMBL (EU557280)
84	FlDop_00099 Fructose-bisphosphate aldolase	Fructose-16-bisphosphate aldolase class II	GO:0004332 - fructose-bisphosphate aldolase activity|GO:0006096 - glycolytic process|GO:0008270 - zinc ion binding|GO:0030388 - fructose 16-bisphosphate metabolic process	Uniprot (A0A660HMP3)|Interpro (A0A660HMP3)	KEGG (pzi:CWO85_02275)|KEGG GM (pzi:CWO85_02275)|KEGG EC (4.1.2.13)	Interpro (IPR013785)|Interpro (IPR000771)|Interpro (IPR011289)|Pfam (PF01116)	EMBL (CP025121)
85	FlDop_00100 Putative bifunctional phosphatase/peptidyl-prolyl cis-trans isomerase	HAD family hydrolase	GO:0016791 - phosphatase activity	Uniprot (A0A660HMW0)|Interpro (A0A660HMW0)	KEGG (pzi:CWO85_02280)|KEGG GM (pzi:CWO85_02280)	Interpro (IPR036412)|Interpro (IPR006379)|Interpro (IPR023214)	EMBL (CP025121)
86	FlDop_00101 hypothetical protein	Uncharacterized protein	GO:0016021 - integral component of membrane	Uniprot (A0A660HMR1)|Interpro (A0A660HMR1)	KEGG (pzi:CWO85_02285)|KEGG GM (pzi:CWO85_02285)		EMBL (CP025121)
87	FlDop_00102 DNA gyrase subunit B	DNA gyrase subunit B	GO:0003677 - DNA binding|GO:0003918 - DNA topoisomerase type II (double strand cut ATP-hydrolyzing) activity|GO:0005524 - ATP binding|GO:0005694 - chromosome|GO:0005737 - cytoplasm|GO:0006261 - DNA-templated DNA replication|GO:0006265 - DNA topological change|GO:0046872 - metal ion binding	Uniprot (A0A660HP35)|Interpro (A0A660HP35)	KEGG (pzi:CWO85_02290)|KEGG GM (pzi:CWO85_02290)|KEGG EC (5.6.2.2)	Interpro (IPR002288)|Interpro (IPR011557)|Interpro (IPR003594)|Interpro (IPR036890)|Interpro (IPR020568)|Interpro (IPR014721)|Interpro (IPR001241)|Interpro (IPR013760)|Interpro (IPR013759)|Interpro (IPR013506)|Interpro (IPR018522)|Interpro (IPR006171)|Interpro (IPR034160)|Pfam (PF00204)|Pfam (PF00986)|Pfam (PF02518)|Pfam (PF01751)	EMBL (CP025121)
88	FlDop_00103 DNA gyrase subunit A	DNA topoisomerase (ATP-hydrolyzing)	GO:0003677 - DNA binding|GO:0003918 - DNA topoisomerase type II (double strand cut ATP-hydrolyzing) activity|GO:0005524 - ATP binding|GO:0006265 - DNA topological change	Uniprot (A0A660HMR9)|Interpro (A0A660HMR9)	KEGG (pzi:CWO85_02295)|KEGG GM (pzi:CWO85_02295)|KEGG EC (5.6.2.2)	Interpro (IPR006691)|Interpro (IPR035516)|Interpro (IPR013760)|Interpro (IPR013758)|Interpro (IPR013757)|Interpro (IPR002205)|Pfam (PF03989)|Pfam (PF00521)	EMBL (CP025121)
89	FlDop_00104 tRNA threonylcarbamoyladenosine biosynthesis protein TsaE	t(6)A37 threonylcarbamoyladenosine biosynthesis protein TsaE	GO:0002949 - tRNA threonylcarbamoyladenosine modification|GO:0005737 - cytoplasm|GO:0016740 - transferase activity	Uniprot (A0A660HMS4)|Interpro (A0A660HMS4)	KEGG (pzi:CWO85_02300)|KEGG GM (pzi:CWO85_02300)	Interpro (IPR027417)|Interpro (IPR003442)|Pfam (PF02367)	EMBL (CP025121)
90	FlDop_00105 tRNA threonylcarbamoyladenosine biosynthesis protein TsaB	tRNA (Adenosine(37)-N6)-threonylcarbamoyltransferase complex dimerization subunit type 1 TsaB	GO:0002949 - tRNA threonylcarbamoyladenosine modification|GO:0016740 - transferase activity	Uniprot (A0A660HNG8)|Interpro (A0A660HNG8)	KEGG (pzi:CWO85_02305)|KEGG GM (pzi:CWO85_02305)	Interpro (IPR043129)|Interpro (IPR000905)|Interpro (IPR022496)|Pfam (PF00814)	EMBL (CP025121)
91	FlDop_00106 tRNA N6-adenosine threonylcarbamoyltransferase	tRNA N6-adenosine threonylcarbamoyltransferase	GO:0002949 - tRNA threonylcarbamoyladenosine modification|GO:0005506 - iron ion binding|GO:0005737 - cytoplasm|GO:0061711 - N(6)-L-threonylcarbamoyladenine synthase activity	Uniprot (A0A660HMR0)|Interpro (A0A660HMR0)	KEGG (pzi:CWO85_02310)|KEGG GM (pzi:CWO85_02310)|KEGG EC (2.3.1.234)	Interpro (IPR043129)|Interpro (IPR000905)|Interpro (IPR017861)|Interpro (IPR022450)|Pfam (PF00814)	EMBL (CP025121)
92	FlDop_00107 Glutamine--tRNA ligase	Glutamine--tRNA ligase	GO:0004819 - glutamine-tRNA ligase activity|GO:0005524 - ATP binding|GO:0005737 - cytoplasm|GO:0006425 - glutaminyl-tRNA aminoacylation	Uniprot (A0A660HMS2)|Interpro (A0A660HMS2)	KEGG (pzi:CWO85_02315)|KEGG GM (pzi:CWO85_02315)|KEGG EC (6.1.1.18)	Interpro (IPR001412)|Interpro (IPR004514)|Interpro (IPR000924)|Interpro (IPR020058)|Interpro (IPR020059)|Interpro (IPR020056)|Interpro (IPR011035)|Interpro (IPR014729)|Pfam (PF00749)|Pfam (PF03950)	EMBL (CP025121)
93	FlDop_00108 hypothetical protein	DUF2130 domain-containing protein		Uniprot (A0A660HN76)|Interpro (A0A660HN76)	KEGG (pzi:CWO85_02320)|KEGG GM (pzi:CWO85_02320)	Interpro (IPR019219)|Pfam (PF09903)	EMBL (CP025121)
94	FlDop_00109 hypothetical protein	Uncharacterized protein		Uniprot (B1VAU2)|Interpro (B1VAU2)	KEGG (pal:PA0731)|KEGG GM (pal:PA0731)		NCBI (501327554)|EMBL (AM422018)
95	FlDop_00110 Antitoxin SocA	DUF4065 domain-containing protein		Uniprot (A0A5N5XRN5)|Interpro (A0A5N5XRN5)		Interpro (IPR025272)|Pfam (PF13274)	EMBL (VWOH01000007)
96	FlDop_00111 hypothetical protein	Restriction endonuclease	GO:0004519 - endonuclease activity	Uniprot (A0A2B1T539)|Interpro (A0A2B1T539)		Interpro (IPR019065)|Pfam (PF09565)	EMBL (NVMX01000015)
97	FlDop_00112 hypothetical protein	Uncharacterized protein		Uniprot (A0A660HMQ7)|Interpro (A0A660HMQ7)	KEGG (pzi:CWO85_02325)|KEGG GM (pzi:CWO85_02325)		EMBL (CP025121)
98	FlDop_00117 50S ribosomal protein L13	50S ribosomal protein L13	GO:0003735 - structural constituent of ribosome|GO:0005840 - ribosome|GO:0006412 - translation	Uniprot (A0A660HMT3)|Interpro (A0A660HMT3)	KEGG (pzi:CWO85_02350)|KEGG GM (pzi:CWO85_02350)	Interpro (IPR005822)|Interpro (IPR005823)|Interpro (IPR023563)|Interpro (IPR036899)|Pfam (PF00572)	EMBL (CP025121)
99	FlDop_00118 30S ribosomal protein S9	30S ribosomal protein S9	GO:0003735 - structural constituent of ribosome|GO:0005737 - cytoplasm|GO:0005840 - ribosome|GO:0006412 - translation	Uniprot (A0A660HMX1)|Interpro (A0A660HMX1)	KEGG (pzi:CWO85_02355)|KEGG GM (pzi:CWO85_02355)	Interpro (IPR020568)|Interpro (IPR014721)|Interpro (IPR000754)|Interpro (IPR023035)|Interpro (IPR020574)|Pfam (PF00380)	EMBL (CP025121)
100	FlDop_00119 Glutamate--tRNA ligase	Glutamate--tRNA ligase	GO:0000049 - tRNA binding|GO:0004818 - glutamate-tRNA ligase activity|GO:0005524 - ATP binding|GO:0005737 - cytoplasm|GO:0006424 - glutamyl-tRNA aminoacylation|GO:0008270 - zinc ion binding	Uniprot (A0A660HMR7)|Interpro (A0A660HMR7)	KEGG (pzi:CWO85_02360)|KEGG GM (pzi:CWO85_02360)|KEGG EC (6.1.1.24)	Interpro (IPR045462)|Interpro (IPR020751)|Interpro (IPR001412)|Interpro (IPR008925)|Interpro (IPR004527)|Interpro (IPR000924)|Interpro (IPR020058)|Interpro (IPR020061)|Interpro (IPR033910)|Interpro (IPR014729)|Pfam (PF19269)|Pfam (PF00749)	EMBL (CP025121)
101	FlDop_00120 Cysteine--tRNA ligase	Cysteine--tRNA ligase	GO:0004817 - cysteine-tRNA ligase activity|GO:0005524 - ATP binding|GO:0005737 - cytoplasm|GO:0006423 - cysteinyl-tRNA aminoacylation|GO:0008270 - zinc ion binding	Uniprot (A0A660HMS8)|Interpro (A0A660HMS8)	KEGG (pzi:CWO85_02365)|KEGG GM (pzi:CWO85_02365)|KEGG EC (6.1.1.16)	Interpro (IPR015803)|Interpro (IPR015273)|Interpro (IPR024909)|Interpro (IPR014729)|Interpro (IPR032678)|Interpro (IPR009080)|Pfam (PF09190)|Pfam (PF01406)	EMBL (CP025121)
102	FlDop_00121 putative cation-transporting ATPase E	Cation-transporting ATPase	GO:0005524 - ATP binding|GO:0016021 - integral component of membrane	Uniprot (A0A660HMT0)|Interpro (A0A660HMT0)	KEGG (pzi:CWO85_02370)|KEGG GM (pzi:CWO85_02370)	Interpro (IPR023299)|Interpro (IPR018303)|Interpro (IPR023298)|Interpro (IPR008250)|Interpro (IPR036412)|Interpro (IPR023214)|Interpro (IPR001757)|Interpro (IPR044492)	EMBL (CP025121)
103	FlDop_00122 Putative TrmH family tRNA/rRNA methyltransferase	23S rRNA (Guanosine(2251)-2'-O)-methyltransferase RlmB	GO:0003723 - RNA binding|GO:0005737 - cytoplasm|GO:0006396 - RNA processing|GO:0008173 - RNA methyltransferase activity	Uniprot (A0A660HNH3)|Interpro (A0A660HNH3)	KEGG (pzi:CWO85_02375)|KEGG GM (pzi:CWO85_02375)|KEGG EC (2.1.1.185)	Interpro (IPR029028)|Interpro (IPR029064)|Interpro (IPR004441)|Interpro (IPR001537)|Interpro (IPR013123)|Interpro (IPR029026)|Pfam (PF00588)|Pfam (PF08032)	EMBL (CP025121)
104	FlDop_00123 50S ribosomal protein L33 3	50S ribosomal protein L33	GO:0003735 - structural constituent of ribosome|GO:0005840 - ribosome|GO:0006412 - translation	Uniprot (A0A660HMS0)|Interpro (A0A660HMS0)	KEGG (pzi:CWO85_02380)|KEGG GM (pzi:CWO85_02380)	Interpro (IPR038584)|Interpro (IPR001705)|Interpro (IPR011332)|Pfam (PF00471)	EMBL (CP025121)
105	FlDop_00124 preprotein translocase subunit SecE	preprotein translocase subunit SecE	GO:0016021 - integral component of membrane	Uniprot (A0A660HMT1)|Interpro (A0A660HMT1)	KEGG (pzi:CWO85_02385)|KEGG GM (pzi:CWO85_02385)		EMBL (CP025121)
106	FlDop_00125 Transcription termination/antitermination protein NusG	Transcription termination/antitermination protein NusG	GO:0006353 - DNA-templated transcription termination|GO:0006354 - DNA-templated transcription elongation|GO:0031564 - transcription antitermination|GO:0032784 - regulation of DNA-templated transcription elongation	Uniprot (A0A660HN87)|Interpro (A0A660HN87)	KEGG (pzi:CWO85_02390)|KEGG GM (pzi:CWO85_02390)	Interpro (IPR006645)|Interpro (IPR036735)|Interpro (IPR043425)|Interpro (IPR014722)|Interpro (IPR001062)|Interpro (IPR015869)|Interpro (IPR008991)|Pfam (PF02357)	EMBL (CP025121)
107	FlDop_00126 50S ribosomal protein L11	50S ribosomal protein L11	GO:0003735 - structural constituent of ribosome|GO:0005840 - ribosome|GO:0006412 - translation|GO:0070180 - large ribosomal subunit rRNA binding	Uniprot (A0A660HMR6)|Interpro (A0A660HMR6)	KEGG (pzi:CWO85_02395)|KEGG GM (pzi:CWO85_02395)	Interpro (IPR000911)|Interpro (IPR036796)|Interpro (IPR006519)|Interpro (IPR020783)|Interpro (IPR036769)|Interpro (IPR020785)|Interpro (IPR020784)|Pfam (PF00298)|Pfam (PF03946)	EMBL (CP025121)
108	FlDop_00127 50S ribosomal protein L1	50S ribosomal protein L1	GO:0000049 - tRNA binding|GO:0003735 - structural constituent of ribosome|GO:0006412 - translation|GO:0006417 - regulation of translation|GO:0015934 - large ribosomal subunit|GO:0019843 - rRNA binding	Uniprot (A0A660HMU0)|Interpro (A0A660HMU0)	KEGG (pzi:CWO85_02400)|KEGG GM (pzi:CWO85_02400)	Interpro (IPR005878)|Interpro (IPR002143)|Interpro (IPR023674)|Interpro (IPR028364)|Interpro (IPR016095)|Pfam (PF00687)	EMBL (CP025121)
109	FlDop_00128 50S ribosomal protein L10	50S ribosomal protein L10	GO:0005840 - ribosome	Uniprot (A0A660HMY2)|Interpro (A0A660HMY2)	KEGG (pzi:CWO85_02405)|KEGG GM (pzi:CWO85_02405)	Interpro (IPR043141)|Interpro (IPR001790)|Pfam (PF00466)	EMBL (CP025121)
110	FlDop_00129 50S ribosomal protein L7/L12	50S ribosomal protein L7/L12	GO:0003735 - structural constituent of ribosome|GO:0005840 - ribosome|GO:0006412 - translation	Uniprot (A0A660HMS7)|Interpro (A0A660HMS7)	KEGG (pzi:CWO85_02410)|KEGG GM (pzi:CWO85_02410)	Interpro (IPR000206)|Interpro (IPR014719)|Interpro (IPR013823)|Interpro (IPR008932)|Interpro (IPR036235)|Pfam (PF00542)|Pfam (PF16320)	EMBL (CP025121)
111	FlDop_00130 DNA-directed RNA polymerase subunit beta	DNA-directed RNA polymerase subunit beta	GO:0003677 - DNA binding|GO:0003899 - DNA-directed 5'-3' RNA polymerase activity|GO:0006351 - transcription DNA-templated|GO:0032549 - ribonucleoside binding	Uniprot (A0A660HMU2)|Interpro (A0A660HMU2)	KEGG (pzi:CWO85_02415)|KEGG GM (pzi:CWO85_02415)|KEGG EC (2.7.7.6)	Interpro (IPR042107)|Interpro (IPR019462)|Interpro (IPR015712)|Interpro (IPR007120)|Interpro (IPR037033)|Interpro (IPR010243)|Interpro (IPR007121)|Interpro (IPR007644)|Interpro (IPR007642)|Interpro (IPR037034)|Interpro (IPR007645)|Interpro (IPR007641)|Interpro (IPR014724)|Pfam (PF04563)|Pfam (PF04561)|Pfam (PF04565)|Pfam (PF10385)|Pfam (PF00562)|Pfam (PF04560)	EMBL (CP025121)
112	FlDop_00131 DNA-directed RNA polymerase subunit beta'	DNA-directed RNA polymerase subunit beta'	GO:0000287 - magnesium ion binding|GO:0003677 - DNA binding|GO:0003899 - DNA-directed 5'-3' RNA polymerase activity|GO:0006351 - transcription DNA-templated|GO:0008270 - zinc ion binding	Uniprot (A0A660HMU1)|Interpro (A0A660HMU1)	KEGG (pzi:CWO85_02420)|KEGG GM (pzi:CWO85_02420)|KEGG EC (2.7.7.6)	Interpro (IPR045867)|Interpro (IPR012754)|Interpro (IPR000722)|Interpro (IPR006592)|Interpro (IPR007080)|Interpro (IPR007066)|Interpro (IPR042102)|Interpro (IPR007083)|Interpro (IPR007081)|Interpro (IPR044893)|Interpro (IPR038120)|Pfam (PF04997)|Pfam (PF00623)|Pfam (PF04983)|Pfam (PF05000)|Pfam (PF04998)	EMBL (CP025121)
113	FlDop_00132 30S ribosomal protein S12	30S ribosomal protein S12	GO:0000049 - tRNA binding|GO:0003735 - structural constituent of ribosome|GO:0006412 - translation|GO:0015935 - small ribosomal subunit|GO:0019843 - rRNA binding	Uniprot (A0A660HNI7)|Interpro (A0A660HNI7)	KEGG (pzi:CWO85_02425)|KEGG GM (pzi:CWO85_02425)	Interpro (IPR012340)|Interpro (IPR006032)|Interpro (IPR005679)|Pfam (PF00164)	EMBL (CP025121)
114	FlDop_00133 30S ribosomal protein S7	30S ribosomal protein S7	GO:0000049 - tRNA binding|GO:0003735 - structural constituent of ribosome|GO:0006412 - translation|GO:0015935 - small ribosomal subunit|GO:0019843 - rRNA binding	Uniprot (A0A660HMT2)|Interpro (A0A660HMT2)	KEGG (pzi:CWO85_02430)|KEGG GM (pzi:CWO85_02430)	Interpro (IPR000235)|Interpro (IPR005717)|Interpro (IPR020606)|Interpro (IPR023798)|Interpro (IPR036823)|Pfam (PF00177)	EMBL (CP025121)
115	FlDop_00134 Elongation factor G	Elongation factor G	GO:0003746 - translation elongation factor activity|GO:0003924 - GTPase activity|GO:0005525 - GTP binding|GO:0005737 - cytoplasm	Uniprot (A0A660HMT8)|Interpro (A0A660HMT8)	KEGG (pzi:CWO85_02435)|KEGG GM (pzi:CWO85_02435)	Interpro (IPR041095)|Interpro (IPR009022)|Interpro (IPR035647)|Interpro (IPR035649)|Interpro (IPR000640)|Interpro (IPR004161)|Interpro (IPR031157)|Interpro (IPR027417)|Interpro (IPR020568)|Interpro (IPR014721)|Interpro (IPR005225)|Interpro (IPR000795)|Interpro (IPR009000)|Interpro (IPR004540)|Interpro (IPR005517)|Pfam (PF00679)|Pfam (PF14492)|Pfam (PF03764)|Pfam (PF00009)|Pfam (PF03144)	EMBL (CP025121)
116	FlDop_00135 Elongation factor Tu	Elongation factor Tu	GO:0003746 - translation elongation factor activity|GO:0003924 - GTPase activity|GO:0005525 - GTP binding	Uniprot (B2G336)|Interpro (B2G336)		Interpro (IPR041709)|Interpro (IPR004161)|Interpro (IPR033720)|Interpro (IPR031157)|Interpro (IPR027417)|Interpro (IPR005225)|Interpro (IPR000795)|Interpro (IPR009000)|Interpro (IPR009001)|Interpro (IPR004541)|Interpro (IPR004160)|Pfam (PF00009)|Pfam (PF03144)|Pfam (PF03143)	NCBI (187453124)|EMBL (AM939565)
117	FlDop_00136 hypothetical protein	Uncharacterized protein	GO:0016021 - integral component of membrane	Uniprot (B1VAK9)|Interpro (B1VAK9)	KEGG (pal:PA0648)|KEGG GM (pal:PA0648)		NCBI (501327481)|EMBL (AM422018)
118	FlDop_00137 hypothetical protein	Partial DNA double-strand break repair rad50 ATPase		Uniprot (R4RNU0)|Interpro (R4RNU0)	KEGG (nzs:SLY_0223)|KEGG GM (nzs:SLY_0223)		NCBI (505450670)|EMBL (CP002548)
119	FlDop_00138 hypothetical protein
120	FlDop_00139 AAA family ATPase	AAA family ATPase	GO:0005524 - ATP binding	Uniprot (A0A660HN54)|Interpro (A0A660HN54)	KEGG (pzi:CWO85_02995)|KEGG GM (pzi:CWO85_02995)	Interpro (IPR011579)|Interpro (IPR004256)|Interpro (IPR027417)|Interpro (IPR011335)|Pfam (PF01637)|Pfam (PF03008)	EMBL (CP025121)
121	FlDop_00140 hypothetical protein	Uncharacterized protein		Uniprot (A0A421NU75)|Interpro (A0A421NU75)		Interpro (IPR021348)|Interpro (IPR011047)|Pfam (PF11178)	EMBL (MPBG01000017)
122	FlDop_00141 hypothetical protein	Uncharacterized protein		Uniprot (B3R0M9)|Interpro (B3R0M9)	KEGG (pml:ATP_00426)|KEGG GM (pml:ATP_00426)		NCBI (501496299)|EMBL (CU469464)
123	FlDop_00142 Holliday junction ATP-dependent DNA helicase RuvB	Holliday junction ATP-dependent DNA helicase RuvB	GO:0003677 - DNA binding|GO:0005524 - ATP binding|GO:0006281 - DNA repair|GO:0006310 - DNA recombination|GO:0009378 - four-way junction helicase activity|GO:0009432 - SOS response|GO:0016887 - ATP hydrolysis activity	Uniprot (A0A660HMZ5)|Interpro (A0A660HMZ5)	KEGG (pzi:CWO85_02770)|KEGG GM (pzi:CWO85_02770)|KEGG EC (5.6.2.4)	Interpro (IPR003593)|Interpro (IPR041445)|Interpro (IPR004605)|Interpro (IPR027417)|Interpro (IPR008824)|Interpro (IPR008823)|Interpro (IPR036388)|Interpro (IPR036390)|Pfam (PF17864)|Pfam (PF05491)|Pfam (PF05496)	EMBL (CP025121)
124	FlDop_00143 Holliday junction ATP-dependent DNA helicase RuvA	Holliday junction ATP-dependent DNA helicase RuvA	GO:0003677 - DNA binding|GO:0005524 - ATP binding|GO:0006281 - DNA repair|GO:0006310 - DNA recombination|GO:0009378 - four-way junction helicase activity|GO:0009379 - Holliday junction helicase complex|GO:0009432 - SOS response|GO:0016887 - ATP hydrolysis activity	Uniprot (A0A660HMX8)|Interpro (A0A660HMX8)	KEGG (pzi:CWO85_02765)|KEGG GM (pzi:CWO85_02765)|KEGG EC (5.6.2.4)	Interpro (IPR013849)|Interpro (IPR003583)|Interpro (IPR012340)|Interpro (IPR000085)|Interpro (IPR010994)|Interpro (IPR011114)|Interpro (IPR036267)|Pfam (PF07499)|Pfam (PF01330)	EMBL (CP025121)
125	FlDop_00144 hypothetical protein	Uncharacterized protein		Uniprot (A0A660HNG1)|Interpro (A0A660HNG1)	KEGG (pzi:CWO85_02760)|KEGG GM (pzi:CWO85_02760)		EMBL (CP025121)
126	FlDop_00145 HTH-type transcriptional regulator PuuR	XRE family transcriptional regulator	GO:0003677 - DNA binding	Uniprot (A0A660HMZ3)|Interpro (A0A660HMZ3)	KEGG (pzi:CWO85_02755)|KEGG GM (pzi:CWO85_02755)	Interpro (IPR001387)|Interpro (IPR013096)|Interpro (IPR010982)|Interpro (IPR014710)|Interpro (IPR011051)|Pfam (PF07883)|Pfam (PF01381)	EMBL (CP025121)
127	FlDop_00146 Triosephosphate isomerase	Triosephosphate isomerase	GO:0004807 - triose-phosphate isomerase activity|GO:0005737 - cytoplasm|GO:0006094 - gluconeogenesis|GO:0006096 - glycolytic process	Uniprot (A0A660HMY8)|Interpro (A0A660HMY8)	KEGG (pzi:CWO85_02750)|KEGG GM (pzi:CWO85_02750)|KEGG EC (5.3.1.1)	Interpro (IPR013785)|Interpro (IPR035990)|Interpro (IPR022896)|Interpro (IPR000652)|Pfam (PF00121)	EMBL (CP025121)
128	FlDop_00147 ATP-dependent DNA helicase PcrA	DNA helicase	GO:0003677 - DNA binding|GO:0003678 - DNA helicase activity|GO:0005524 - ATP binding|GO:0016887 - ATP hydrolysis activity	Uniprot (A0A660HNP4)|Interpro (A0A660HNP4)	KEGG (pzi:CWO85_02745)|KEGG GM (pzi:CWO85_02745)|KEGG EC (5.6.2.4)	Interpro (IPR013986)|Interpro (IPR014017)|Interpro (IPR000212)|Interpro (IPR027417)|Interpro (IPR014016)|Pfam (PF00580)|Pfam (PF13361)	EMBL (CP025121)
129	FlDop_00148 hypothetical protein	Putative helicase	GO:0003677 - DNA binding|GO:0004386 - helicase activity|GO:0005524 - ATP binding|GO:0008168 - methyltransferase activity|GO:0016787 - hydrolase activity|GO:0032259 - methylation	Uniprot (A0A1B1G8D4)|Interpro (A0A1B1G8D4)		Interpro (IPR002052)|Interpro (IPR006935)|Interpro (IPR014001)|Interpro (IPR001650)|Interpro (IPR039442)|Interpro (IPR027417)|Interpro (IPR011335)|Interpro (IPR029063)|Interpro (IPR041635)|Pfam (PF00271)|Pfam (PF13156)|Pfam (PF04851)|Pfam (PF18135)	NCBI (1043076677)|EMBL (CP013714)
130	FlDop_00149 hypothetical protein	Putative helicase	GO:0003677 - DNA binding|GO:0004386 - helicase activity|GO:0004518 - nuclease activity|GO:0005524 - ATP binding|GO:0008168 - methyltransferase activity|GO:0032259 - methylation	Uniprot (A0A510KZA1)|Interpro (A0A510KZA1)	KEGG (lte:JMUB4039_0071)|KEGG GM (lte:JMUB4039_0071)	Interpro (IPR002052)|Interpro (IPR006935)|Interpro (IPR014001)|Interpro (IPR001650)|Interpro (IPR039442)|Interpro (IPR027417)|Interpro (IPR011335)|Interpro (IPR029063)|Interpro (IPR011856)|Interpro (IPR041635)|Pfam (PF00271)|Pfam (PF13156)|Pfam (PF04851)|Pfam (PF18135)	EMBL (AP019845)
131	FlDop_00150 hypothetical protein	Putative helicase	GO:0003677 - DNA binding|GO:0004386 - helicase activity|GO:0004518 - nuclease activity|GO:0005524 - ATP binding|GO:0008168 - methyltransferase activity|GO:0032259 - methylation	Uniprot (A0A2G5XAR1)|Interpro (A0A2G5XAR1)		Interpro (IPR002052)|Interpro (IPR006935)|Interpro (IPR014001)|Interpro (IPR001650)|Interpro (IPR039442)|Interpro (IPR027417)|Interpro (IPR011335)|Interpro (IPR029063)|Interpro (IPR011856)|Interpro (IPR041635)|Pfam (PF00271)|Pfam (PF13156)|Pfam (PF04851)|Pfam (PF18135)	EMBL (PDYP01000008)
132	FlDop_00151 L-lactate dehydrogenase	L-lactate dehydrogenase	GO:0004459 - L-lactate dehydrogenase activity|GO:0005737 - cytoplasm|GO:0006096 - glycolytic process	Uniprot (A0A660HN23)|Interpro (A0A660HN23)	KEGG (pzi:CWO85_02735)|KEGG GM (pzi:CWO85_02735)|KEGG EC (1.1.1.27)	Interpro (IPR001557)|Interpro (IPR011304)|Interpro (IPR018177)|Interpro (IPR022383)|Interpro (IPR001236)|Interpro (IPR015955)|Interpro (IPR036291)|Pfam (PF02866)|Pfam (PF00056)	EMBL (CP025121)
133	FlDop_00152 ATP-dependent zinc metalloprotease FtsH	ATP-dependent zinc metalloprotease FtsH	GO:0004176 - ATP-dependent peptidase activity|GO:0004222 - metalloendopeptidase activity|GO:0005524 - ATP binding|GO:0005886 - plasma membrane|GO:0008270 - zinc ion binding|GO:0016021 - integral component of membrane|GO:0016887 - ATP hydrolysis activity|GO:0030163 - protein catabolic process	Uniprot (A0A660HP05)|Interpro (A0A660HP05)	KEGG (pzi:CWO85_03500)|KEGG GM (pzi:CWO85_03500)	Interpro (IPR003593)|Interpro (IPR041569)|Interpro (IPR003959)|Interpro (IPR003960)|Interpro (IPR005936)|Interpro (IPR027417)|Interpro (IPR000642)|Interpro (IPR037219)|Pfam (PF00004)|Pfam (PF17862)|Pfam (PF01434)	EMBL (CP025121)
134	FlDop_00153 hypothetical protein	Uncharacterized protein (Htmp5)	GO:0016021 - integral component of membrane	Uniprot (A0A660HNA9)|Interpro (A0A660HNA9)	KEGG (pzi:CWO85_03505)|KEGG GM (pzi:CWO85_03505)		EMBL (CP025121)
135	FlDop_00154 hypothetical protein
136	FlDop_00155 partial 30S ribosomal protein S14	Ribosomal protein S14	GO:0003735 - structural constituent of ribosome|GO:0005840 - ribosome|GO:0006412 - translation	Uniprot (I6ULT8)|Interpro (I6ULT8)		Interpro (IPR001209)|Interpro (IPR043140)|Pfam (PF00253)	NCBI (393010766)|EMBL (JN851863)
137	FlDop_00156 hypothetical protein
138	FlDop_00157 hypothetical protein
139	FlDop_00158 hypothetical protein	Uncharacterized protein		Uniprot (A0A660HN33)|Interpro (A0A660HN33)	KEGG (pzi:CWO85_02790)|KEGG GM (pzi:CWO85_02790)		EMBL (CP025121)
140	FlDop_00159 Pyruvate kinase	Pyruvate kinase	GO:0000287 - magnesium ion binding|GO:0004743 - pyruvate kinase activity|GO:0005524 - ATP binding|GO:0016301 - kinase activity|GO:0030955 - potassium ion binding	Uniprot (A0A660HNE2)|Interpro (A0A660HNE2)	KEGG (pzi:CWO85_02800)|KEGG GM (pzi:CWO85_02800)|KEGG EC (2.7.1.40)	Interpro (IPR001697)|Interpro (IPR015813)|Interpro (IPR040442)|Interpro (IPR011037)|Interpro (IPR018209)|Interpro (IPR015793)|Interpro (IPR036918)|Interpro (IPR015806)|Pfam (PF00224)	EMBL (CP025121)
141	FlDop_00160 hypothetical protein	Uncharacterized protein (Bax inhibitor-1/YccA family protein)	GO:0016021 - integral component of membrane	Uniprot (A0A660HNQ3)|Interpro (A0A660HNQ3)	KEGG (pzi:CWO85_02805)|KEGG GM (pzi:CWO85_02805)	Interpro (IPR010539)|Pfam (PF12811)	EMBL (CP025121)
142	FlDop_00161 30S ribosomal protein S16	30S ribosomal protein S16	GO:0003735 - structural constituent of ribosome|GO:0005737 - cytoplasm|GO:0005840 - ribosome|GO:0006412 - translation	Uniprot (A0A660HMZ6)|Interpro (A0A660HMZ6)	KEGG (pzi:CWO85_02810)|KEGG GM (pzi:CWO85_02810)	Interpro (IPR000307)|Interpro (IPR023803)|Pfam (PF00886)	EMBL (CP025121)
143	FlDop_00162 tRNA (guanine-N(1)-)-methyltransferase	tRNA (guanine-N(1)-)-methyltransferase	GO:0005737 - cytoplasm|GO:0052906 - tRNA (guanine(37)-N(1))-methyltransferase activity	Uniprot (A0A660HN02)|Interpro (A0A660HN02)	KEGG (pzi:CWO85_02815)|KEGG GM (pzi:CWO85_02815)|KEGG EC (2.1.1.228)	Interpro (IPR029028)|Interpro (IPR002649)|Interpro (IPR023148)|Interpro (IPR029026)|Interpro (IPR016009)|Pfam (PF01746)	EMBL (CP025121)
144	FlDop_00163 50S ribosomal protein L19	50S ribosomal protein L19	GO:0003735 - structural constituent of ribosome|GO:0005840 - ribosome|GO:0006412 - translation	Uniprot (A0A660HNG6)|Interpro (A0A660HNG6)	KEGG (pzi:CWO85_02820)|KEGG GM (pzi:CWO85_02820)	Interpro (IPR038657)|Interpro (IPR001857)|Interpro (IPR018257)|Interpro (IPR008991)|Pfam (PF01245)	EMBL (CP025121)
145	FlDop_00164 Tyrosine--tRNA ligase 1	Tyrosine--tRNA ligase	GO:0003723 - RNA binding|GO:0004831 - tyrosine-tRNA ligase activity|GO:0005524 - ATP binding|GO:0005737 - cytoplasm|GO:0006437 - tyrosyl-tRNA aminoacylation	Uniprot (A0A660HMY9)|Interpro (A0A660HMY9)	KEGG (pzi:CWO85_02825)|KEGG GM (pzi:CWO85_02825)|KEGG EC (6.1.1.1)	Interpro (IPR002305)|Interpro (IPR014729)|Interpro (IPR036986)|Interpro (IPR002307)|Interpro (IPR024088)|Interpro (IPR024107)|Pfam (PF00579)	EMBL (CP025121)
146	FlDop_00165 Zinc-dependent sulfurtransferase SufU	SUF system NifU family Fe-S cluster assembly protein	GO:0005506 - iron ion binding|GO:0016226 - iron-sulfur cluster assembly|GO:0051536 - iron-sulfur cluster binding	Uniprot (A0A660HN03)|Interpro (A0A660HN03)	KEGG (pzi:CWO85_02830)|KEGG GM (pzi:CWO85_02830)	Interpro (IPR002871)|Pfam (PF01592)	EMBL (CP025121)
147	FlDop_00166 Methionine import ATP-binding protein MetN	ABC transporter ATP-binding protein	GO:0005524 - ATP binding|GO:0015821 - methionine transport|GO:0042626 - ATPase-coupled transmembrane transporter activity	Uniprot (A0A660HN58)|Interpro (A0A660HN58)	KEGG (pzi:CWO85_02835)|KEGG GM (pzi:CWO85_02835)	Interpro (IPR003593)|Interpro (IPR026253)|Interpro (IPR003439)|Interpro (IPR027417)|Pfam (PF00005)	EMBL (CP025121)
148	FlDop_00167 hypothetical protein	Uncharacterized protein	GO:0016021 - integral component of membrane	Uniprot (A0A660HN04)|Interpro (A0A660HN04)	KEGG (pzi:CWO85_02840)|KEGG GM (pzi:CWO85_02840)		EMBL (CP025121)
149	FlDop_00168 D-methionine transport system permease protein MetI	ABC transporter permease	GO:0005886 - plasma membrane|GO:0016021 - integral component of membrane|GO:0055085 - transmembrane transport	Uniprot (A0A660HN43)|Interpro (A0A660HN43)	KEGG (pzi:CWO85_02845)|KEGG GM (pzi:CWO85_02845)	Interpro (IPR000515)|Interpro (IPR035906)|Pfam (PF00528)	EMBL (CP025121)
150	FlDop_00169 hypothetical protein	Uncharacterized protein (DUF5716 family protein)		Uniprot (A0A660HN35)|Interpro (A0A660HN35)	KEGG (pzi:CWO85_02850)|KEGG GM (pzi:CWO85_02850)	Interpro (IPR043773)|Pfam (PF18982)	EMBL (CP025121)
151	FlDop_00170 hypothetical protein	Uncharacterized protein	GO:0016021 - integral component of membrane	Uniprot (A0A660HNR2)|Interpro (A0A660HNR2)	KEGG (pzi:CWO85_02855)|KEGG GM (pzi:CWO85_02855)		EMBL (CP025121)
152	FlDop_00171 putative GTP-binding protein EngB	Probable GTP-binding protein EngB	GO:0000917 - division septum assembly|GO:0005525 - GTP binding|GO:0046872 - metal ion binding	Uniprot (A0A660HN05)|Interpro (A0A660HN05)	KEGG (pzi:CWO85_02860)|KEGG GM (pzi:CWO85_02860)	Interpro (IPR030393)|Interpro (IPR006073)|Interpro (IPR019987)|Interpro (IPR027417)|Pfam (PF01926)	EMBL (CP025121)
153	FlDop_00172 Valine--tRNA ligase	Valine--tRNA ligase	GO:0002161 - aminoacyl-tRNA editing activity|GO:0004832 - valine-tRNA ligase activity|GO:0005524 - ATP binding|GO:0005737 - cytoplasm|GO:0006438 - valyl-tRNA aminoacylation	Uniprot (A0A660HN11)|Interpro (A0A660HN11)	KEGG (pzi:CWO85_02865)|KEGG GM (pzi:CWO85_02865)|KEGG EC (6.1.1.9)	Interpro (IPR001412)|Interpro (IPR002300)|Interpro (IPR033705)|Interpro (IPR013155)|Interpro (IPR014729)|Interpro (IPR010978)|Interpro (IPR032678)|Interpro (IPR009080)|Interpro (IPR037118)|Interpro (IPR009008)|Interpro (IPR002303)|Pfam (PF08264)|Pfam (PF00133)|Pfam (PF01406)	EMBL (CP025121)
154	FlDop_00173 Calcium-transporting ATPase	ATPase	GO:0005524 - ATP binding|GO:0016021 - integral component of membrane	Uniprot (A0A660HNH2)|Interpro (A0A660HNH2)	KEGG (pzi:CWO85_02870)|KEGG GM (pzi:CWO85_02870)	Interpro (IPR006068)|Interpro (IPR004014)|Interpro (IPR023299)|Interpro (IPR018303)|Interpro (IPR023298)|Interpro (IPR008250)|Interpro (IPR036412)|Interpro (IPR023214)|Interpro (IPR001757)|Interpro (IPR044492)|Pfam (PF00689)|Pfam (PF00690)	EMBL (CP025121)
155	FlDop_00174 Peptidyl-tRNA hydrolase	Peptidyl-tRNA hydrolase	GO:0004045 - aminoacyl-tRNA hydrolase activity|GO:0005737 - cytoplasm|GO:0006412 - translation	Uniprot (A0A660HN06)|Interpro (A0A660HN06)	KEGG (pzi:CWO85_02875)|KEGG GM (pzi:CWO85_02875)|KEGG EC (3.1.1.29)	Interpro (IPR001328)|Interpro (IPR018171)|Interpro (IPR036416)|Pfam (PF01195)	EMBL (CP025121)
156	FlDop_00180 Polyribonucleotide nucleotidyltransferase	Polyribonucleotide nucleotidyltransferase	GO:0000287 - magnesium ion binding|GO:0003723 - RNA binding|GO:0004654 - polyribonucleotide nucleotidyltransferase activity|GO:0005737 - cytoplasm|GO:0006396 - RNA processing|GO:0006402 - mRNA catabolic process	Uniprot (A0A660HN13)|Interpro (A0A660HN13)	KEGG (pzi:CWO85_02910)|KEGG GM (pzi:CWO85_02910)|KEGG EC (2.7.7.8)	Interpro (IPR001247)|Interpro (IPR015847)|Interpro (IPR036345)|Interpro (IPR004087)|Interpro (IPR036612)|Interpro (IPR012340)|Interpro (IPR012162)|Interpro (IPR027408)|Interpro (IPR015848)|Interpro (IPR036456)|Interpro (IPR020568)|Interpro (IPR022967)|Interpro (IPR003029)|Pfam (PF03726)|Pfam (PF01138)|Pfam (PF03725)|Pfam (PF00575)	EMBL (CP025121)
157	FlDop_00181 hypothetical protein
158	FlDop_00182 hypothetical protein	Uncharacterized protein		Uniprot (A0A421NXE7)|Interpro (A0A421NXE7)			EMBL (MPBG01000005)
159	FlDop_00183 hypothetical protein	Uncharacterized protein	GO:0016021 - integral component of membrane	Uniprot (A0A0M1MZU1)|Interpro (A0A0M1MZU1)			NCBI (924546923)|EMBL (LHCF01000008)
160	FlDop_00184 hypothetical protein	Uncharacterized protein	GO:0016021 - integral component of membrane	Uniprot (R4RLQ0)|Interpro (R4RLQ0)	KEGG (nzs:SLY_0340)|KEGG GM (nzs:SLY_0340)	Interpro (IPR010539)|Pfam (PF12811)	NCBI (500238630)|EMBL (CP002548)
161	FlDop_00185 hypothetical protein	SVM_signal domain-containing protein	GO:0016021 - integral component of membrane	Uniprot (A0A0M1MZC9)|Interpro (A0A0M1MZC9)		Interpro (IPR021970)|Pfam (PF12113)	NCBI (924547056)|EMBL (LHCF01000026)
162	FlDop_00186 hypothetical protein	Uncharacterized protein	GO:0016021 - integral component of membrane	Uniprot (A0A660HN00)|Interpro (A0A660HN00)	KEGG (pzi:CWO85_02520)|KEGG GM (pzi:CWO85_02520)		EMBL (CP025121)
163	FlDop_00187 hypothetical protein
164	FlDop_00188 ABC transporter substrate-binding protein	ABC transporter substrate-binding protein		Uniprot (A0A0M1N0W0)|Interpro (A0A0M1N0W0)		Interpro (IPR039424)|Interpro (IPR000914)|Pfam (PF00496)	NCBI (924546806)|EMBL (LHCF01000003)
165	FlDop_00189 ATP-dependent zinc metalloprotease FtsH	ATP-dependent zinc metalloprotease FtsH	GO:0004176 - ATP-dependent peptidase activity|GO:0004222 - metalloendopeptidase activity|GO:0005524 - ATP binding|GO:0005886 - plasma membrane|GO:0008270 - zinc ion binding|GO:0016021 - integral component of membrane|GO:0016887 - ATP hydrolysis activity|GO:0030163 - protein catabolic process	Uniprot (A0A2X0QBI2)|Interpro (A0A2X0QBI2)		Interpro (IPR003593)|Interpro (IPR041569)|Interpro (IPR003959)|Interpro (IPR003960)|Interpro (IPR005936)|Interpro (IPR027417)|Interpro (IPR000642)|Interpro (IPR037219)|Pfam (PF00004)|Pfam (PF17862)|Pfam (PF01434)	EMBL (LT999755)
166	FlDop_00190 hypothetical protein	Uncharacterized protein		Uniprot (A0A1S9M165)|Interpro (A0A1S9M165)			NCBI (1151037826)|EMBL (MWKN01000041)
167	FlDop_00191 hypothetical protein	SVM_signal domain-containing protein		Uniprot (A0A660HMR4)|Interpro (A0A660HMR4)	KEGG (pzi:CWO85_00790)|KEGG GM (pzi:CWO85_00790)	Interpro (IPR021970)|Pfam (PF12113)	EMBL (CP025121)
168	FlDop_00192 hypothetical protein	SVM_signal domain-containing protein	GO:0016021 - integral component of membrane	Uniprot (A0A660HM07)|Interpro (A0A660HM07)	KEGG (pzi:CWO85_03075)|KEGG GM (pzi:CWO85_03075)	Interpro (IPR021970)|Pfam (PF12113)	EMBL (CP025121)
169	FlDop_00193 Cytosol aminopeptidase (leucyl aminopeptidase)	Probable cytosol aminopeptidase	GO:0005737 - cytoplasm|GO:0030145 - manganese ion binding|GO:0070006 - metalloaminopeptidase activity	Uniprot (A0A660HN57)|Interpro (A0A660HN57)	KEGG (pzi:CWO85_03140)|KEGG GM (pzi:CWO85_03140)|KEGG EC (3.4.11.1)	Interpro (IPR011356)|Interpro (IPR043472)|Interpro (IPR000819)|Interpro (IPR023042)|Interpro (IPR008283)|Pfam (PF00883)|Pfam (PF02789)	EMBL (CP025121)
170	FlDop_00194 hypothetical protein
171	FlDop_00195 hypothetical protein
172	FlDop_00196 hypothetical protein	Uncharacterized protein	GO:0016021 - integral component of membrane	Uniprot (A0A660HN80)|Interpro (A0A660HN80)	KEGG (pzi:CWO85_02980)|KEGG GM (pzi:CWO85_02980)		EMBL (CP025121)
173	FlDop_00197 hypothetical protein	Uncharacterized protein	GO:0016021 - integral component of membrane	Uniprot (A0A660HN21)|Interpro (A0A660HN21)	KEGG (pzi:CWO85_02975)|KEGG GM (pzi:CWO85_02975)		EMBL (CP025121)
174	FlDop_00198 Sucrose phosphorylase	Sucrose phosphorylase	GO:0004645 - 14-alpha-oligoglucan phosphorylase activity|GO:0044262 - cellular carbohydrate metabolic process	Uniprot (A0A660HN14)|Interpro (A0A660HN14)	KEGG (pzi:CWO85_02970)|KEGG GM (pzi:CWO85_02970)|KEGG EC (2.4.1.7)	Interpro (IPR006047)|Interpro (IPR017853)|Interpro (IPR045857)|Interpro (IPR016377)|Interpro (IPR022527)|Pfam (PF00128)	EMBL (CP025121)
175	FlDop_00199 Elongation factor P	Elongation factor P	GO:0003746 - translation elongation factor activity|GO:0005737 - cytoplasm	Uniprot (A0A660HNI1)|Interpro (A0A660HNI1)	KEGG (pzi:CWO85_02965)|KEGG GM (pzi:CWO85_02965)	Interpro (IPR015365)|Interpro (IPR012340)|Interpro (IPR014722)|Interpro (IPR020599)|Interpro (IPR013185)|Interpro (IPR001059)|Interpro (IPR013852)|Interpro (IPR011768)|Interpro (IPR008991)|Pfam (PF01132)|Pfam (PF08207)|Pfam (PF09285)	EMBL (CP025121)
176	FlDop_00200 tRNA dimethylallyltransferase	tRNA dimethylallyltransferase	GO:0005524 - ATP binding|GO:0008033 - tRNA processing|GO:0052381 - tRNA dimethylallyltransferase activity	Uniprot (A0A660HN20)|Interpro (A0A660HN20)	KEGG (pzi:CWO85_02960)|KEGG GM (pzi:CWO85_02960)|KEGG EC (2.5.1.75)	Interpro (IPR039657)|Interpro (IPR018022)|Interpro (IPR027417)	EMBL (CP025121)
177	FlDop_00201 2'3'-cyclic-nucleotide 2'-phosphodiesterase	TIGR00282 family metallophosphoesterase	GO:0046872 - metal ion binding	Uniprot (A0A660HN12)|Interpro (A0A660HN12)	KEGG (pzi:CWO85_02955)|KEGG GM (pzi:CWO85_02955)|KEGG EC (3.1.4.16)	Interpro (IPR029052)|Interpro (IPR005235)|Pfam (PF13277)	EMBL (CP025121)
178	FlDop_00202 Ribonuclease Y	Ribonuclease Y	GO:0003723 - RNA binding|GO:0004521 - endoribonuclease activity|GO:0005886 - plasma membrane|GO:0006402 - mRNA catabolic process|GO:0016021 - integral component of membrane	Uniprot (A0A660HNS0)|Interpro (A0A660HNS0)	KEGG (pzi:CWO85_02950)|KEGG GM (pzi:CWO85_02950)	Interpro (IPR003607)|Interpro (IPR006674)|Interpro (IPR006675)|Interpro (IPR004087)|Interpro (IPR004088)|Interpro (IPR036612)|Interpro (IPR017705)|Interpro (IPR022711)|Pfam (PF01966)|Pfam (PF00013)|Pfam (PF12072)	EMBL (CP025121)
179	FlDop_00203 hypothetical protein	Uncharacterized protein		Uniprot (A0A660HN44)|Interpro (A0A660HN44)	KEGG (pzi:CWO85_02945)|KEGG GM (pzi:CWO85_02945)		EMBL (CP025121)
180	FlDop_00204 hypothetical protein
181	FlDop_00205 ATP-dependent zinc metalloprotease FtsH	ATP-dependent zinc metalloprotease FtsH	GO:0004176 - ATP-dependent peptidase activity|GO:0004222 - metalloendopeptidase activity|GO:0005524 - ATP binding|GO:0005886 - plasma membrane|GO:0008270 - zinc ion binding|GO:0016021 - integral component of membrane|GO:0016887 - ATP hydrolysis activity|GO:0030163 - protein catabolic process	Uniprot (A0A2X0QAG5)|Interpro (A0A2X0QAG5)		Interpro (IPR003593)|Interpro (IPR041569)|Interpro (IPR003959)|Interpro (IPR003960)|Interpro (IPR005936)|Interpro (IPR027417)|Interpro (IPR000642)|Interpro (IPR037219)|Pfam (PF00004)|Pfam (PF17862)|Pfam (PF01434)	EMBL (LT999756)
182	FlDop_00207 hypothetical protein
183	FlDop_00209 Calcium-transporting ATPase 1	Cation_ATPase_N domain-containing protein	GO:0005524 - ATP binding|GO:0016021 - integral component of membrane	Uniprot (A0A660HN69)|Interpro (A0A660HN69)	KEGG (pzi:CWO85_02920)|KEGG GM (pzi:CWO85_02920)|KEGG EC (7.2.2.10)	Interpro (IPR006068)|Interpro (IPR004014)|Interpro (IPR023299)|Interpro (IPR018303)|Interpro (IPR023298)|Interpro (IPR008250)|Interpro (IPR036412)|Interpro (IPR023214)|Interpro (IPR001757)|Interpro (IPR044492)|Pfam (PF00689)|Pfam (PF00690)	EMBL (CP025121)
184	FlDop_00210 hemolysin family protein	Hemolysin	GO:0016021 - integral component of membrane|GO:0050660 - flavin adenine dinucleotide binding	Uniprot (A0A660HNE0)|Interpro (A0A660HNE0)	KEGG (pzi:CWO85_02915)|KEGG GM (pzi:CWO85_02915)	Interpro (IPR000644)|Interpro (IPR002550)|Interpro (IPR036318)|Interpro (IPR016169)|Interpro (IPR044751)|Interpro (IPR005170)|Pfam (PF00571)|Pfam (PF03471)|Pfam (PF01595)	EMBL (CP025121)
185	FlDop_00211 hypothetical protein
186	FlDop_00212 hypothetical protein	Uncharacterized protein		Uniprot (A0A660HMF5)|Interpro (A0A660HMF5)	KEGG (pzi:CWO85_01580)|KEGG GM (pzi:CWO85_01580)		EMBL (CP025121)
187	FlDop_00213 hypothetical protein	Peptidase_M23 domain-containing protein		Uniprot (A0A381PNT8)|Interpro (A0A381PNT8)		Interpro (IPR011055)|Interpro (IPR016047)|Pfam (PF01551)	EMBL (UINC01001003)
188	FlDop_00214 hypothetical protein
189	FlDop_00215 hypothetical protein
190	FlDop_00216 CDP-diacylglycerol--glycerol-3-phosphate 3-phosphatidyltransferase	CDP-diacylglycerol--glycerol-3-phosphate 3-phosphatidyltransferase	GO:0008444 - CDP-diacylglycerol-glycerol-3-phosphate 3-phosphatidyltransferase activity|GO:0008654 - phospholipid biosynthetic process|GO:0016021 - integral component of membrane	Uniprot (A0A0N8IAU8)|Interpro (A0A0N8IAU8)		Interpro (IPR000462)|Interpro (IPR043130)|Interpro (IPR004570)|Pfam (PF01066)	NCBI (937367289)|EMBL (CP040925)
191	FlDop_00217 Protein RecA	Protein RecA	GO:0003684 - damaged DNA binding|GO:0003697 - single-stranded DNA binding|GO:0005524 - ATP binding|GO:0005737 - cytoplasm|GO:0006281 - DNA repair|GO:0006310 - DNA recombination|GO:0008094 - ATP-dependent activity acting on DNA|GO:0009432 - SOS response	Uniprot (A0A2S8NTE6)|Interpro (A0A2S8NTE6)		Interpro (IPR003593)|Interpro (IPR013765)|Interpro (IPR027417)|Interpro (IPR020588)|Interpro (IPR023400)|Interpro (IPR020587)|Pfam (PF00154)	EMBL (PUUG01000073)
192	FlDop_00218 Ribonucleoside-diphosphate reductase subunit beta	Ribonucleoside-diphosphate reductase	GO:0004748 - ribonucleoside-diphosphate reductase activity thioredoxin disulfide as acceptor|GO:0005971 - ribonucleoside-diphosphate reductase complex|GO:0006260 - DNA replication|GO:0009263 - deoxyribonucleotide biosynthetic process	Uniprot (A0A2S8NTM1)|Interpro (A0A2S8NTM1)		Interpro (IPR009078)|Interpro (IPR012348)|Interpro (IPR026494)|Interpro (IPR033909)|Interpro (IPR000358)|Pfam (PF00268)	EMBL (PUUG01000073)
193	FlDop_00219 Acetate kinase	Acetate kinase	GO:0000287 - magnesium ion binding|GO:0005524 - ATP binding|GO:0005737 - cytoplasm|GO:0006082 - organic acid metabolic process|GO:0006085 - acetyl-CoA biosynthetic process|GO:0008776 - acetate kinase activity	Uniprot (A0A5N5XSN5)|Interpro (A0A5N5XSN5)		Interpro (IPR004372)|Interpro (IPR000890)|Interpro (IPR023865)|Interpro (IPR043129)|Pfam (PF00871)	EMBL (VWXM01000004)
194	FlDop_00221 Thymidylate synthase	Thymidylate synthase	GO:0004799 - thymidylate synthase activity|GO:0005737 - cytoplasm|GO:0006231 - dTMP biosynthetic process|GO:0006235 - dTTP biosynthetic process|GO:0032259 - methylation	Uniprot (A0A0L0MJW2)|Interpro (A0A0L0MJW2)		Interpro (IPR045097)|Interpro (IPR023451)|Interpro (IPR036926)|Interpro (IPR000398)|Interpro (IPR020940)|Pfam (PF00303)	NCBI (912989582)|EMBL (JPSQ01000023)
195	FlDop_00222 Dihydrofolate reductase	Dihydrofolate reductase	GO:0004146 - dihydrofolate reductase activity|GO:0006545 - glycine biosynthetic process|GO:0046654 - tetrahydrofolate biosynthetic process|GO:0050661 - NADP binding	Uniprot (A0A0L0MKY9)|Interpro (A0A0L0MKY9)		Interpro (IPR012259)|Interpro (IPR024072)|Interpro (IPR001796)|Pfam (PF00186)	NCBI (912989585)|EMBL (JPSQ01000023)
196	FlDop_00223 1-acyl-sn-glycerol-3-phosphate acyltransferase	1-acyl-sn-glycerol-3-phosphate acyltransferase	GO:0016021 - integral component of membrane|GO:0016746 - acyltransferase activity	Uniprot (A0A559KJY9)|Interpro (A0A559KJY9)		Interpro (IPR002123)|Pfam (PF01553)	EMBL (VIAE01000001)
197	FlDop_00224 Pyruvate dehydrogenase E1 component subunit alpha	Pyruvate dehydrogenase E1 component subunit alpha	GO:0004739 - pyruvate dehydrogenase (acetyl-transferring) activity|GO:0006096 - glycolytic process	Uniprot (A0A0M1N0Y3)|Interpro (A0A0M1N0Y3)		Interpro (IPR001017)|Interpro (IPR017596)|Interpro (IPR029061)|Pfam (PF00676)	NCBI (924546405)|EMBL (LHCF01000001)
198	FlDop_00225 Pyruvate dehydrogenase E1 component subunit beta	Thiamine pyrophosphate-dependent dehydrogenase E1 component (Beta subunit PdhB-like)	GO:0003824 - catalytic activity	Uniprot (A0A559KJK8)|Interpro (A0A559KJK8)		Interpro (IPR029061)|Interpro (IPR009014)|Interpro (IPR005475)|Interpro (IPR033248)|Pfam (PF02779)|Pfam (PF02780)	EMBL (VIAE01000004)
199	FlDop_00226 biotin/lipoyl-binding protein	biotin/lipoyl-binding protein	GO:0005737 - cytoplasm|GO:0016746 - acyltransferase activity	Uniprot (U2E8P3)|Interpro (U2E8P3)		Interpro (IPR003016)|Interpro (IPR001078)|Interpro (IPR000089)|Interpro (IPR023213)|Interpro (IPR036625)|Interpro (IPR004167)|Interpro (IPR011053)|Pfam (PF00198)|Pfam (PF00364)|Pfam (PF02817)	NCBI (543104930)|EMBL (AFNU02000010)
200	FlDop_00227 2-oxo acid dehydrogenase subunit E2	2-oxo acid dehydrogenase subunit E2	GO:0016746 - acyltransferase activity	Uniprot (A0A0L0MJX8)|Interpro (A0A0L0MJX8)		Interpro (IPR001078)|Interpro (IPR023213)|Pfam (PF00198)	NCBI (912989528)|EMBL (JPSQ01000017)
201	FlDop_00228 Dihydrolipoyl dehydrogenase	Dihydrolipoyl dehydrogenase	GO:0004148 - dihydrolipoyl dehydrogenase activity|GO:0045454 - cell redox homeostasis|GO:0050660 - flavin adenine dinucleotide binding	Uniprot (A0A1S9LYU3)|Interpro (A0A1S9LYU3)		Interpro (IPR036188)|Interpro (IPR023753)|Interpro (IPR016156)|Interpro (IPR006258)|Interpro (IPR001100)|Interpro (IPR004099)|Interpro (IPR012999)|Pfam (PF07992)|Pfam (PF02852)	NCBI (1151036813)|EMBL (MWKN01000090)
202	FlDop_00229 D-aminoacyl-tRNA deacylase	TatD family deoxyribonuclease	GO:0004536 - deoxyribonuclease activity	Uniprot (A0A660HNF3)|Interpro (A0A660HNF3)	KEGG (pzi:CWO85_03550)|KEGG GM (pzi:CWO85_03550)	Interpro (IPR018228)|Interpro (IPR015991)|Interpro (IPR032466)|Interpro (IPR001130)|Pfam (PF01026)	EMBL (CP025121)
203	FlDop_00230 DNA ligase	DNA ligase	GO:0003911 - DNA ligase (NAD+) activity|GO:0006260 - DNA replication|GO:0006281 - DNA repair|GO:0046872 - metal ion binding	Uniprot (A0A660HNF6)|Interpro (A0A660HNF6)	KEGG (pzi:CWO85_03540)|KEGG GM (pzi:CWO85_03540)|KEGG EC (6.5.1.2)	Interpro (IPR001357)|Interpro (IPR036420)|Interpro (IPR041663)|Interpro (IPR018239)|Interpro (IPR001679)|Interpro (IPR013839)|Interpro (IPR013840)|Interpro (IPR012340)|Interpro (IPR004150)|Interpro (IPR010994)|Pfam (PF00533)|Pfam (PF01653)|Pfam (PF03120)|Pfam (PF12826)	EMBL (CP025121)
204	FlDop_00231 Holo-[acyl-carrier-protein] synthase	ACP synthase	GO:0000287 - magnesium ion binding|GO:0006633 - fatty acid biosynthetic process|GO:0008897 - holo-	Uniprot (A0A660HNB9)|Interpro (A0A660HNB9)	KEGG (pzi:CWO85_03535)|KEGG GM (pzi:CWO85_03535)|KEGG EC (2.7.8.7)	Interpro (IPR008278)|Interpro (IPR037143)|Interpro (IPR004568)|Pfam (PF01648)	EMBL (CP025121)
205	FlDop_00232 hypothetical protein	Uncharacterized protein	GO:0016021 - integral component of membrane	Uniprot (A0A660HNJ4)|Interpro (A0A660HNJ4)	KEGG (pzi:CWO85_03530)|KEGG GM (pzi:CWO85_03530)		EMBL (CP025121)
206	FlDop_00233 Putative cysteine protease YraA	DJ-1 family protein		Uniprot (A0A660HNB5)|Interpro (A0A660HNB5)	KEGG (pzi:CWO85_03520)|KEGG GM (pzi:CWO85_03520)|KEGG EC (3.5.1.124)	Interpro (IPR029062)|Interpro (IPR002818)|Pfam (PF01965)	EMBL (CP025121)
207	FlDop_00234 Citrate/malate transporter	Malate:citrate symporter	GO:0008514 - organic anion transmembrane transporter activity|GO:0016021 - integral component of membrane	Uniprot (A0A660HNT1)|Interpro (A0A660HNT1)	KEGG (pzi:CWO85_03515)|KEGG GM (pzi:CWO85_03515)	Interpro (IPR004679)|Pfam (PF03390)	EMBL (CP025121)
208	FlDop_00235 hypothetical protein	Uncharacterized protein	GO:0016021 - integral component of membrane	Uniprot (A0A660HNC0)|Interpro (A0A660HNC0)	KEGG (pzi:CWO85_03510)|KEGG GM (pzi:CWO85_03510)		EMBL (CP025121)
209	FlDop_00236 hypothetical protein
210	FlDop_00237 hypothetical protein
211	FlDop_00238 ATP-dependent zinc metalloprotease FtsH	ATP-dependent zinc binding membrane protease	GO:0004176 - ATP-dependent peptidase activity|GO:0004222 - metalloendopeptidase activity|GO:0005524 - ATP binding|GO:0005886 - plasma membrane|GO:0016021 - integral component of membrane|GO:0016887 - ATP hydrolysis activity	Uniprot (A0A2X0QAN4)|Interpro (A0A2X0QAN4)		Interpro (IPR003593)|Interpro (IPR041569)|Interpro (IPR003959)|Interpro (IPR003960)|Interpro (IPR005936)|Interpro (IPR027417)|Interpro (IPR000642)|Interpro (IPR037219)|Pfam (PF00004)|Pfam (PF17862)|Pfam (PF01434)	EMBL (LT999757)
212	FlDop_00239 ABC transporter substrate-binding protein	ABC transporter substrate-binding protein	GO:0016021 - integral component of membrane	Uniprot (A0A660HMX0)|Interpro (A0A660HMX0)	KEGG (pzi:CWO85_02625)|KEGG GM (pzi:CWO85_02625)	Interpro (IPR039424)|Interpro (IPR000914)|Pfam (PF00496)	EMBL (CP025121)
213	FlDop_00240 hypothetical protein
214	FlDop_00241 hypothetical protein	Putative helicase	GO:0003677 - DNA binding|GO:0004386 - helicase activity|GO:0004518 - nuclease activity|GO:0005524 - ATP binding|GO:0008168 - methyltransferase activity|GO:0032259 - methylation	Uniprot (A0A510KZA1)|Interpro (A0A510KZA1)	KEGG (lte:JMUB4039_0071)|KEGG GM (lte:JMUB4039_0071)	Interpro (IPR002052)|Interpro (IPR006935)|Interpro (IPR014001)|Interpro (IPR001650)|Interpro (IPR039442)|Interpro (IPR027417)|Interpro (IPR011335)|Interpro (IPR029063)|Interpro (IPR011856)|Interpro (IPR041635)|Pfam (PF00271)|Pfam (PF13156)|Pfam (PF04851)|Pfam (PF18135)	EMBL (AP019845)
215	FlDop_00242 hypothetical protein	Helicase	GO:0003677 - DNA binding|GO:0004386 - helicase activity|GO:0005524 - ATP binding|GO:0008168 - methyltransferase activity|GO:0016787 - hydrolase activity|GO:0032259 - methylation	Uniprot (A0A1B1G8D4)|Interpro (A0A1B1G8D4)		Interpro (IPR002052)|Interpro (IPR006935)|Interpro (IPR014001)|Interpro (IPR001650)|Interpro (IPR039442)|Interpro (IPR027417)|Interpro (IPR011335)|Interpro (IPR029063)|Interpro (IPR041635)|Pfam (PF00271)|Pfam (PF13156)|Pfam (PF04851)|Pfam (PF18135)	NCBI (1043076677)|EMBL (CP013714)
216	FlDop_00243 hypothetical protein
217	FlDop_00244 hypothetical protein
218	FlDop_00245 hypothetical protein	Peptidase_M23 domain-containing protein		Uniprot (A0A381PNT8)|Interpro (A0A381PNT8)		Interpro (IPR011055)|Interpro (IPR016047)|Pfam (PF01551)	EMBL (UINC01001003)
219	FlDop_00246 hypothetical protein	Uncharacterized protein	GO:0016021 - integral component of membrane	Uniprot (A0A660HM35)|Interpro (A0A660HM35)	KEGG (pzi:CWO85_00870)|KEGG GM (pzi:CWO85_00870)		EMBL (CP025121)
220	FlDop_00247 hypothetical protein	Uncharacterized protein		Uniprot (Q2NJN7)|Interpro (Q2NJN7)	KEGG (ayw:AYWB_239)|KEGG GM (ayw:AYWB_239)		NCBI (84789624)|EMBL (CP000061)
221	FlDop_00248 hypothetical protein
222	FlDop_00249 ATP-dependent zinc metalloprotease FtsH	Peptidase_M41 domain-containing protein	GO:0004176 - ATP-dependent peptidase activity|GO:0004222 - metalloendopeptidase activity|GO:0005524 - ATP binding|GO:0016021 - integral component of membrane	Uniprot (A0A660HN16)|Interpro (A0A660HN16)	KEGG (pzi:CWO85_02680)|KEGG GM (pzi:CWO85_02680)	Interpro (IPR000642)|Interpro (IPR037219)|Pfam (PF01434)	EMBL (CP025121)
223	FlDop_00250 hypothetical protein	Uncharacterized protein		Uniprot (A0A660HMZ7)|Interpro (A0A660HMZ7)	KEGG (pzi:CWO85_02685)|KEGG GM (pzi:CWO85_02685)		EMBL (CP025121)
224	FlDop_00251 ATP-dependent zinc metalloprotease FtsH	AAA domain-containing protein	GO:0005524 - ATP binding|GO:0016021 - integral component of membrane|GO:0016887 - ATP hydrolysis activity	Uniprot (A0A660HNN4)|Interpro (A0A660HNN4)	KEGG (pzi:CWO85_02690)|KEGG GM (pzi:CWO85_02690)	Interpro (IPR003593)|Interpro (IPR003959)|Interpro (IPR027417)|Pfam (PF00004)	EMBL (CP025121)
225	FlDop_00252 hypothetical protein	Uncharacterized protein	GO:0016021 - integral component of membrane	Uniprot (A0A660HMY0)|Interpro (A0A660HMY0)	KEGG (pzi:CWO85_02695)|KEGG GM (pzi:CWO85_02695)		EMBL (CP025121)
226	FlDop_00253 hypothetical protein	Uncharacterized protein	GO:0016021 - integral component of membrane	Uniprot (A0A660HMY3)|Interpro (A0A660HMY3)	KEGG (pzi:CWO85_02700)|KEGG GM (pzi:CWO85_02700)		EMBL (CP025121)
227	FlDop_00254 hypothetical protein	Uncharacterized protein	GO:0016021 - integral component of membrane	Uniprot (A0A660HNM0)|Interpro (A0A660HNM0)	KEGG (pzi:CWO85_03175)|KEGG GM (pzi:CWO85_03175)		EMBL (CP025121)
228	FlDop_00255 GTPase Obg	GTPase Obg	GO:0000287 - magnesium ion binding|GO:0003924 - GTPase activity|GO:0005525 - GTP binding|GO:0005737 - cytoplasm|GO:0042254 - ribosome biogenesis	Uniprot (A0A660HN59)|Interpro (A0A660HN59)	KEGG (pzi:CWO85_03180)|KEGG GM (pzi:CWO85_03180)	Interpro (IPR031167)|Interpro (IPR006073)|Interpro (IPR014100)|Interpro (IPR036346)|Interpro (IPR006169)|Interpro (IPR036726)|Interpro (IPR045086)|Interpro (IPR015349)|Interpro (IPR027417)|Interpro (IPR005225)|Pfam (PF09269)|Pfam (PF01018)|Pfam (PF01926)	EMBL (CP025121)
229	FlDop_00256 50S ribosomal protein L27	50S ribosomal protein L27	GO:0003735 - structural constituent of ribosome|GO:0005737 - cytoplasm|GO:0005840 - ribosome|GO:0006412 - translation	Uniprot (A0A660HN55)|Interpro (A0A660HN55)	KEGG (pzi:CWO85_03185)|KEGG GM (pzi:CWO85_03185)	Interpro (IPR001684)|Interpro (IPR018261)|Pfam (PF01016)	EMBL (CP025121)
230	FlDop_00257 ribosomal-processing cysteine protease Prp	Ribosomal-processing cysteine protease Prp	GO:0008233 - peptidase activity	Uniprot (A0A660HNF4)|Interpro (A0A660HNF4)	KEGG (pzi:CWO85_03190)|KEGG GM (pzi:CWO85_03190)	Interpro (IPR007422)|Interpro (IPR036764)|Pfam (PF04327)	EMBL (CP025121)
231	FlDop_00258 50S ribosomal protein L21	50S ribosomal protein L21	GO:0003735 - structural constituent of ribosome|GO:0005737 - cytoplasm|GO:0005840 - ribosome|GO:0006412 - translation|GO:0019843 - rRNA binding	Uniprot (A0A660HN65)|Interpro (A0A660HN65)	KEGG (pzi:CWO85_03195)|KEGG GM (pzi:CWO85_03195)	Interpro (IPR036164)|Interpro (IPR028909)|Interpro (IPR001787)|Interpro (IPR018258)|Pfam (PF00829)	EMBL (CP025121)
232	FlDop_00259 rhodanese-related sulfurtransferase	rhodanese-related sulfurtransferase	GO:0006400 - tRNA modification|GO:0016705 - oxidoreductase activity acting on paired donors with incorporation or reduction of molecular oxygen	Uniprot (A0A660HN99)|Interpro (A0A660HN99)	KEGG (pzi:CWO85_03200)|KEGG GM (pzi:CWO85_03200)	Interpro (IPR001763)|Interpro (IPR036873)|Interpro (IPR022111)|Interpro (IPR020936)|Interpro (IPR040503)|Pfam (PF00581)|Pfam (PF12368)|Pfam (PF17773)	EMBL (CP025121)
233	FlDop_00260 hypothetical protein	Uncharacterized protein	GO:0016021 - integral component of membrane	Uniprot (A0A660HN94)|Interpro (A0A660HN94)	KEGG (pzi:CWO85_03205)|KEGG GM (pzi:CWO85_03205)		EMBL (CP025121)
234	FlDop_00261 hypothetical protein	Uncharacterized protein	GO:0016021 - integral component of membrane	Uniprot (A0A660HNW4)|Interpro (A0A660HNW4)	KEGG (pzi:CWO85_03210)|KEGG GM (pzi:CWO85_03210)		EMBL (CP025121)
235	FlDop_00262 DNA polymerase III subunit alpha	DNA-directed DNA polymerase	GO:0003887 - DNA-directed DNA polymerase activity|GO:0006260 - DNA replication|GO:0008408 - 3'-5' exonuclease activity	Uniprot (A0A660HN61)|Interpro (A0A660HN61)	KEGG (pzi:CWO85_03215)|KEGG GM (pzi:CWO85_03215)|KEGG EC (2.7.7.7)	Interpro (IPR011708)|Interpro (IPR040982)|Interpro (IPR029460)|Interpro (IPR004013)|Interpro (IPR003141)|Interpro (IPR016195)|Interpro (IPR004805)|Pfam (PF07733)|Pfam (PF17657)|Pfam (PF14579)|Pfam (PF02811)	EMBL (CP025121)
236	FlDop_00263 Lysine--tRNA ligase	Lysine--tRNA ligase	GO:0000287 - magnesium ion binding|GO:0003676 - nucleic acid binding|GO:0004824 - lysine-tRNA ligase activity|GO:0005524 - ATP binding|GO:0005737 - cytoplasm|GO:0006430 - lysyl-tRNA aminoacylation	Uniprot (A0A660HN71)|Interpro (A0A660HN71)	KEGG (pzi:CWO85_03220)|KEGG GM (pzi:CWO85_03220)|KEGG EC (6.1.1.6)	Interpro (IPR004364)|Interpro (IPR006195)|Interpro (IPR045864)|Interpro (IPR002313)|Interpro (IPR044136)|Interpro (IPR018149)|Interpro (IPR012340)|Interpro (IPR004365)|Pfam (PF00152)|Pfam (PF01336)	EMBL (CP025121)
237	FlDop_00264 ATP-dependent zinc metalloprotease FtsH	AAA domain-containing protein	GO:0005524 - ATP binding|GO:0016021 - integral component of membrane|GO:0016887 - ATP hydrolysis activity	Uniprot (A0A660HNF2)|Interpro (A0A660HNF2)	KEGG (pzi:CWO85_02705)|KEGG GM (pzi:CWO85_02705)	Interpro (IPR003593)|Interpro (IPR003959)|Interpro (IPR027417)|Pfam (PF00004)	EMBL (CP025121)
238	FlDop_00265 hypothetical protein	Uncharacterized protein		Uniprot (A0A660HMW8)|Interpro (A0A660HMW8)	KEGG (pzi:CWO85_02710)|KEGG GM (pzi:CWO85_02710)		EMBL (CP025121)
239	FlDop_00266 hypothetical protein	Uncharacterized protein		Uniprot (A0A660HMY5)|Interpro (A0A660HMY5)	KEGG (pzi:CWO85_02715)|KEGG GM (pzi:CWO85_02715)		EMBL (CP025121)
240	FlDop_00267 tRNA modification GTPase MnmE	tRNA modification GTPase MnmE	GO:0003924 - GTPase activity|GO:0005525 - GTP binding|GO:0005737 - cytoplasm|GO:0006400 - tRNA modification|GO:0046872 - metal ion binding	Uniprot (A0A660HMG8)|Interpro (A0A660HMG8)	KEGG (pzi:CWO85_01655)|KEGG GM (pzi:CWO85_01655)	Interpro (IPR031168)|Interpro (IPR006073)|Interpro (IPR018948)|Interpro (IPR004520)|Interpro (IPR027368)|Interpro (IPR025867)|Interpro (IPR027417)|Interpro (IPR005225)|Interpro (IPR027266)|Pfam (PF01926)|Pfam (PF12631)|Pfam (PF10396)	EMBL (CP025121)
241	FlDop_00268 Bifunctional oligoribonuclease and PAP phosphatase NrnA	Bifunctional oligoribonuclease/PAP phosphatase NrnA	GO:0003676 - nucleic acid binding	Uniprot (A0A660HMG7)|Interpro (A0A660HMG7)	KEGG (pzi:CWO85_01650)|KEGG GM (pzi:CWO85_01650)|KEGG EC (3.1.3.7)	Interpro (IPR001667)|Interpro (IPR038763)|Interpro (IPR003156)|Pfam (PF01368)|Pfam (PF02272)	EMBL (CP025121)
242	FlDop_00269 sn-glycerol-3-phosphate-binding periplasmic protein UgpB	extracellular solute-binding protein	GO:0016021 - integral component of membrane	Uniprot (A0A660HMZ4)|Interpro (A0A660HMZ4)	KEGG (pzi:CWO85_02785)|KEGG GM (pzi:CWO85_02785)	Interpro (IPR006059)|Pfam (PF13416)	EMBL (CP025121)
243	FlDop_00270 L-arabinose transport system permease protein AraQ (malG)	Carbohydrate ABC transporter permease	GO:0005886 - plasma membrane|GO:0016021 - integral component of membrane|GO:0055085 - transmembrane transport	Uniprot (A0A660HMH8)|Interpro (A0A660HMH8)	KEGG (pzi:CWO85_01640)|KEGG GM (pzi:CWO85_01640)	Interpro (IPR000515)|Interpro (IPR035906)|Pfam (PF00528)	EMBL (CP025121)
244	FlDop_00271 Lactose transport system permease protein LacF (malF)	Sugar ABC transporter permease	GO:0005886 - plasma membrane|GO:0016021 - integral component of membrane|GO:0055085 - transmembrane transport	Uniprot (A0A660HMH2)|Interpro (A0A660HMH2)	KEGG (pzi:CWO85_01635)|KEGG GM (pzi:CWO85_01635)	Interpro (IPR000515)|Interpro (IPR035906)|Pfam (PF00528)	EMBL (CP025121)
245	FlDop_00272 sn-glycerol-3-phosphate import ATP-binding protein UgpC	ABC transporter ATP-binding protein	GO:0005524 - ATP binding|GO:0005886 - plasma membrane|GO:0015408 - ABC-type ferric iron transporter activity	Uniprot (A0A660HMG5)|Interpro (A0A660HMG5)	KEGG (pzi:CWO85_01630)|KEGG GM (pzi:CWO85_01630)	Interpro (IPR003593)|Interpro (IPR003439)|Interpro (IPR017871)|Interpro (IPR015853)|Interpro (IPR027417)|Pfam (PF00005)	EMBL (CP025121)
246	FlDop_00273 Asparagine--tRNA ligase	Asparagine--tRNA ligase	GO:0004816 - asparagine-tRNA ligase activity|GO:0005524 - ATP binding|GO:0005737 - cytoplasm|GO:0006421 - asparaginyl-tRNA aminoacylation	Uniprot (A0A660HML0)|Interpro (A0A660HML0)	KEGG (pzi:CWO85_01625)|KEGG GM (pzi:CWO85_01625)|KEGG EC (6.1.1.22)	Interpro (IPR004364)|Interpro (IPR006195)|Interpro (IPR045864)|Interpro (IPR004522)|Interpro (IPR002312)|Interpro (IPR012340)|Pfam (PF00152)	EMBL (CP025121)
247	FlDop_00274 Exodeoxyribonuclease 7 large subunit	Exonuclease VII large subunit	GO:0006308 - DNA catabolic process|GO:0008855 - exodeoxyribonuclease VII activity|GO:0009318 - exodeoxyribonuclease VII complex	Uniprot (B3R0Q8)|Interpro (B3R0Q8)	KEGG (pml:ATP_00455)|KEGG GM (pml:ATP_00455)|KEGG EC (3.1.11.6)	Interpro (IPR003753)|Interpro (IPR020579)|Pfam (PF02601)	NCBI (501496325)|EMBL (CU469464)
248	FlDop_00275 hypothetical protein
249	FlDop_00276 hypothetical protein	Uncharacterized protein		Uniprot (A0A421NY14)|Interpro (A0A421NY14)			EMBL (MPBG01000002)
250	FlDop_00277 hypothetical protein	Uncharacterized protein		Uniprot (A0A421NY42)|Interpro (A0A421NY42)			EMBL (MPBG01000002)
251	FlDop_00278 hypothetical protein
252	FlDop_00279 hypothetical membrane protein	Htmp1		Uniprot (A0A3T0QIX4)|Interpro (A0A3T0QIX4)
253	FlDop_00280 Spermidine/putrescine-binding periplasmic protein	Spermidine/putrescine ABC transporter substrate-binding protein	GO:0015846 - polyamine transport|GO:0016021 - integral component of membrane|GO:0019808 - polyamine binding|GO:0042597 - periplasmic space	Uniprot (A0A660HMU7)|Interpro (A0A660HMU7)	KEGG (pzi:CWO85_02455)|KEGG GM (pzi:CWO85_02455)	Interpro (IPR006059)|Interpro (IPR001188)|Pfam (PF13416)	EMBL (CP025121)
254	FlDop_00281 Inner membrane ABC transporter permease protein YdcV	ABC transporter permease	GO:0005886 - plasma membrane|GO:0016021 - integral component of membrane|GO:0055085 - transmembrane transport	Uniprot (A0A660HND9)|Interpro (A0A660HND9)	KEGG (pzi:CWO85_02460)|KEGG GM (pzi:CWO85_02460)	Interpro (IPR000515)|Interpro (IPR035906)|Pfam (PF00528)	EMBL (CP025121)
255	FlDop_00282 Spermidine/putrescine transport system permease protein PotB	Spermidine/putrescine ABC transporter permease	GO:0016021 - integral component of membrane|GO:0055085 - transmembrane transport	Uniprot (A0A660HMZ2)|Interpro (A0A660HMZ2)	KEGG (pzi:CWO85_02465)|KEGG GM (pzi:CWO85_02465)	Interpro (IPR000515)|Interpro (IPR035906)	EMBL (CP025121)
256	FlDop_00283 Spermidine/putrescine import ATP-binding protein PotA	Spermidine/putrescine ABC transporter ATP-binding protein	GO:0005524 - ATP binding	Uniprot (A0A660HMT7)|Interpro (A0A660HMT7)	KEGG (pzi:CWO85_02470)|KEGG GM (pzi:CWO85_02470)|KEGG EC (7.6.2.11)	Interpro (IPR003593)|Interpro (IPR003439)|Interpro (IPR017871)|Interpro (IPR008995)|Interpro (IPR027417)|Pfam (PF00005)	EMBL (CP025121)
257	FlDop_00284 Elongation factor 4	Elongation factor 4	GO:0003746 - translation elongation factor activity|GO:0003924 - GTPase activity|GO:0005525 - GTP binding|GO:0005886 - plasma membrane|GO:0043022 - ribosome binding|GO:0045727 - positive regulation of translation	Uniprot (A0A660HMW2)|Interpro (A0A660HMW2)	KEGG (pzi:CWO85_02475)|KEGG GM (pzi:CWO85_02475)	Interpro (IPR006297)|Interpro (IPR035647)|Interpro (IPR000640)|Interpro (IPR004161)|Interpro (IPR031157)|Interpro (IPR038363)|Interpro (IPR013842)|Interpro (IPR035654)|Interpro (IPR027417)|Interpro (IPR005225)|Interpro (IPR000795)|Pfam (PF00679)|Pfam (PF00009)|Pfam (PF03144)|Pfam (PF06421)	EMBL (CP025121)
258	FlDop_00285 Small ribosomal subunit biogenesis GTPase RsgA	Small ribosomal subunit biogenesis GTPase RsgA	GO:0003924 - GTPase activity|GO:0005525 - GTP binding|GO:0005737 - cytoplasm|GO:0019843 - rRNA binding|GO:0042274 - ribosomal small subunit biogenesis|GO:0046872 - metal ion binding	Uniprot (A0A660HMV6)|Interpro (A0A660HMV6)	KEGG (pzi:CWO85_02480)|KEGG GM (pzi:CWO85_02480)|KEGG EC (3.1.3.100)	Interpro (IPR030378)|Interpro (IPR027417)|Interpro (IPR004881)|Interpro (IPR010914)|Pfam (PF03193)	EMBL (CP025121)
259	FlDop_00286 Phenylalanine--tRNA ligase beta subunit	Phenylalanine--tRNA ligase beta subunit	GO:0000049 - tRNA binding|GO:0000287 - magnesium ion binding|GO:0004826 - phenylalanine-tRNA ligase activity|GO:0005524 - ATP binding|GO:0005737 - cytoplasm|GO:0006432 - phenylalanyl-tRNA aminoacylation	Uniprot (A0A660HNJ6)|Interpro (A0A660HNJ6)	KEGG (pzi:CWO85_02485)|KEGG GM (pzi:CWO85_02485)|KEGG EC (6.1.1.20)	Interpro (IPR045864)|Interpro (IPR005146)|Interpro (IPR009061)|Interpro (IPR005121)|Interpro (IPR036690)|Interpro (IPR012340)|Interpro (IPR045060)|Interpro (IPR004532)|Interpro (IPR020825)|Interpro (IPR041616)|Interpro (IPR002547)|Interpro (IPR033714)|Interpro (IPR005147)|Pfam (PF03483)|Pfam (PF03484)|Pfam (PF03147)|Pfam (PF01588)|Pfam (PF17759)	EMBL (CP025121)
260	FlDop_00287 Phenylalanine--tRNA ligase alpha subunit	Phenylalanine--tRNA ligase alpha subunit	GO:0000049 - tRNA binding|GO:0000287 - magnesium ion binding|GO:0004826 - phenylalanine-tRNA ligase activity|GO:0005524 - ATP binding|GO:0005737 - cytoplasm|GO:0006432 - phenylalanyl-tRNA aminoacylation	Uniprot (A0A660HMT9)|Interpro (A0A660HMT9)	KEGG (pzi:CWO85_02490)|KEGG GM (pzi:CWO85_02490)|KEGG EC (6.1.1.20)	Interpro (IPR006195)|Interpro (IPR045864)|Interpro (IPR004529)|Interpro (IPR004530)|Interpro (IPR022911)|Interpro (IPR002319)|Interpro (IPR010978)|Pfam (PF01409)	EMBL (CP025121)
261	FlDop_00288 hypothetical protein
262	FlDop_00289 putative type I restriction enzymeP M protein	Site-specific DNA-methyltransferase (adenine-specific)	GO:0003677 - DNA binding|GO:0008170 - N-methyltransferase activity|GO:0009007 - site-specific DNA-methyltransferase (adenine-specific) activity	Uniprot (A0A0K2JIH0)|Interpro (A0A0K2JIH0)	KEGG (skn:SKUN_001527)|KEGG GM (skn:SKUN_001527)|KEGG EC (2.1.1.72)	Interpro (IPR038333)|Interpro (IPR003356)|Interpro (IPR029464)|Interpro (IPR000055)|Interpro (IPR044946)|Interpro (IPR000241)|Interpro (IPR029063)|Pfam (PF13588)|Pfam (PF01420)|Pfam (PF02384)	NCBI (922843838)|EMBL (CP010899)
263	FlDop_00290 hypothetical protein	SBP_bac_5 domain-containing protein	GO:0016021 - integral component of membrane	Uniprot (A0A660HLY0)|Interpro (A0A660HLY0)	KEGG (pzi:CWO85_00630)|KEGG GM (pzi:CWO85_00630)	Interpro (IPR039424)|Interpro (IPR000914)|Pfam (PF00496)	EMBL (CP025121)
264	FlDop_00291 ABC transporter substrate-binding protein	ABC-type oligopeptide transport system periplasmatic component	GO:0016021 - integral component of membrane	Uniprot (B3R0R6)|Interpro (B3R0R6)	KEGG (pml:ATP_00463)|KEGG GM (pml:ATP_00463)	Interpro (IPR039424)|Interpro (IPR000914)|Pfam (PF00496)	NCBI (501496332)|EMBL (CU469464)
265	FlDop_00292 ATP-dependent zinc metalloprotease FtsH	ATP-dependent zinc metalloprotease FtsH	GO:0004176 - ATP-dependent peptidase activity|GO:0004222 - metalloendopeptidase activity|GO:0005524 - ATP binding|GO:0005886 - plasma membrane|GO:0008270 - zinc ion binding|GO:0016021 - integral component of membrane|GO:0016887 - ATP hydrolysis activity|GO:0030163 - protein catabolic process	Uniprot (A0A2X0QAI9)|Interpro (A0A2X0QAI9)		Interpro (IPR003593)|Interpro (IPR041569)|Interpro (IPR003959)|Interpro (IPR003960)|Interpro (IPR005936)|Interpro (IPR027417)|Interpro (IPR000642)|Interpro (IPR037219)|Pfam (PF00004)|Pfam (PF17862)|Pfam (PF01434)	EMBL (LT999758)
266	FlDop_00293 hypothetical protein	Uncharacterized protein	GO:0016021 - integral component of membrane	Uniprot (A0A421NV98)|Interpro (A0A421NV98)	KEGG (psol:S284_01730)|KEGG GM (psol:S284_01730)		EMBL (MPBG01000003)
267	FlDop_00294 hypothetical protein
268	FlDop_00295 hypothetical protein
269	FlDop_00296 ATP-dependent zinc metalloprotease FtsH	ATP-dependent Zn protease	GO:0005524 - ATP binding|GO:0008233 - peptidase activity|GO:0016021 - integral component of membrane|GO:0016887 - ATP hydrolysis activity	Uniprot (A0A421NXE0)|Interpro (A0A421NXE0)		Interpro (IPR003593)|Interpro (IPR003959)|Interpro (IPR003960)|Interpro (IPR027417)|Pfam (PF00004)	EMBL (MPBG01000005)
270	FlDop_00297 hypothetical protein	Uncharacterized protein	GO:0016021 - integral component of membrane	Uniprot (B3R0N0)|Interpro (B3R0N0)	KEGG (pml:ATP_00427)|KEGG GM (pml:ATP_00427)		NCBI (193807173)|EMBL (CU469464)
271	FlDop_00298 hypothetical protein	Uncharacterized protein		Uniprot (B3R0M9)|Interpro (B3R0M9)	KEGG (pml:ATP_00426)|KEGG GM (pml:ATP_00426)		NCBI (501496299)|EMBL (CU469464)
272	FlDop_00299 hypothetical protein	Uncharacterized protein	GO:0016021 - integral component of membrane	Uniprot (Q6YQG8)|Interpro (Q6YQG8)	KEGG (poy:PAM_405)|KEGG GM (poy:PAM_405)		NCBI (81402418)|EMBL (AP006628)
273	FlDop_00300 UvrABC system protein C	UvrABC system protein C	GO:0003677 - DNA binding|GO:0005737 - cytoplasm|GO:0006289 - nucleotide-excision repair|GO:0009380 - excinuclease repair complex|GO:0009381 - excinuclease ABC activity|GO:0009432 - SOS response	Uniprot (A0A0M1MZP1)|Interpro (A0A0M1MZP1)		Interpro (IPR000305)|Interpro (IPR035901)|Interpro (IPR010994)|Interpro (IPR001943)|Interpro (IPR036876)|Interpro (IPR004791)|Interpro (IPR001162)|Interpro (IPR038476)|Pfam (PF01541)|Pfam (PF02151)|Pfam (PF08459)	NCBI (924546967)|EMBL (LHCF01000011)
274	FlDop_00301 UvrABC system protein A	Excinuclease ABC subunit UvrA	GO:0003677 - DNA binding|GO:0004518 - nuclease activity|GO:0005524 - ATP binding|GO:0005737 - cytoplasm|GO:0006289 - nucleotide-excision repair|GO:0009380 - excinuclease repair complex|GO:0016887 - ATP hydrolysis activity|GO:0046872 - metal ion binding	Uniprot (A0A660HNZ7)|Interpro (A0A660HNZ7)	KEGG (pzi:CWO85_03445)|KEGG GM (pzi:CWO85_03445)	Interpro (IPR003439)|Interpro (IPR017871)|Interpro (IPR027417)|Interpro (IPR004602)|Interpro (IPR041552)|Interpro (IPR041102)|Pfam (PF00005)|Pfam (PF17755)|Pfam (PF17760)	EMBL (CP025121)
275	FlDop_00302 UvrABC system protein B	UvrABC system protein B	GO:0003677 - DNA binding|GO:0004518 - nuclease activity|GO:0005524 - ATP binding|GO:0005737 - cytoplasm|GO:0006289 - nucleotide-excision repair|GO:0009380 - excinuclease repair complex|GO:0009432 - SOS response|GO:0016887 - ATP hydrolysis activity	Uniprot (A0A660HNA0)|Interpro (A0A660HNA0)	KEGG (pzi:CWO85_03450)|KEGG GM (pzi:CWO85_03450)	Interpro (IPR006935)|Interpro (IPR014001)|Interpro (IPR001650)|Interpro (IPR027417)|Interpro (IPR001943)|Interpro (IPR036876)|Interpro (IPR004807)|Interpro (IPR041471)|Interpro (IPR024759)|Pfam (PF00271)|Pfam (PF04851)|Pfam (PF02151)|Pfam (PF12344)|Pfam (PF17757)	EMBL (CP025121)
276	FlDop_00303 DegV domain-containing protein	DegV family protein	GO:0008289 - lipid binding	Uniprot (A0A660HNB2)|Interpro (A0A660HNB2)	KEGG (pzi:CWO85_03455)|KEGG GM (pzi:CWO85_03455)	Interpro (IPR003797)|Interpro (IPR043168)|Pfam (PF02645)	EMBL (CP025121)
277	FlDop_00304 CCA-adding enzyme	CCA tRNA nucleotidyltransferase	GO:0003723 - RNA binding|GO:0016779 - nucleotidyltransferase activity|GO:0031123 - RNA 3'-end processing	Uniprot (A0A660HNS1)|Interpro (A0A660HNS1)	KEGG (pzi:CWO85_03460)|KEGG GM (pzi:CWO85_03460)|KEGG EC (2.7.7.72)	Interpro (IPR043519)|Interpro (IPR002646)|Interpro (IPR032828)|Pfam (PF01743)|Pfam (PF12627)	EMBL (CP025121)
278	FlDop_00305 3'-5' exoribonuclease YhaM	CMP-binding protein		Uniprot (A0A660HNA6)|Interpro (A0A660HNA6)	KEGG (pzi:CWO85_03465)|KEGG GM (pzi:CWO85_03465)	Interpro (IPR006674)|Pfam (PF01966)	EMBL (CP025121)
279	FlDop_00306 Thioredoxin	Thioredoxin	GO:0006662 - glycerol ether metabolic process|GO:0015035 - protein-disulfide reductase activity	Uniprot (A0A660HNA5)|Interpro (A0A660HNA5)	KEGG (pzi:CWO85_03470)|KEGG GM (pzi:CWO85_03470)	Interpro (IPR005746)|Interpro (IPR036249)|Interpro (IPR017937)|Interpro (IPR013766)|Pfam (PF00085)	EMBL (CP025121)
280	FlDop_00307 tRNA pseudouridine synthase B	tRNA pseudouridine synthase B	GO:0003723 - RNA binding|GO:0031119 - tRNA pseudouridine synthesis|GO:0106029 - tRNA pseudouridine synthase activity	Uniprot (A0A660HNI3)|Interpro (A0A660HNI3)	KEGG (pzi:CWO85_03475)|KEGG GM (pzi:CWO85_03475)|KEGG EC (5.4.99.25)	Interpro (IPR020103)|Interpro (IPR002501)|Interpro (IPR014780)|Pfam (PF01509)	EMBL (CP025121)
281	FlDop_00308 hypothetical protein
282	FlDop_00309 hypothetical protein	Uncharacterized protein		Uniprot (A0A139JRG7)|Interpro (A0A139JRG7)			NCBI (1054776193)|EMBL (JHUK01000001)
283	FlDop_00310 Antitoxin SocA	Phage-associated protein		Uniprot (A0A0P7HWT6)|Interpro (A0A0P7HWT6)		Interpro (IPR025272)|Pfam (PF13274)	NCBI (937367082)|EMBL (CP040925)
284	FlDop_00311 hypothetical protein	Uncharacterized protein		Uniprot (A0A0P7KH18)|Interpro (A0A0P7KH18)			NCBI (937367083)|EMBL (CP040925)
285	FlDop_00312 hypothetical protein
286	FlDop_00313 hypothetical protein	Uncharacterized protein		Uniprot (B1VA04)|Interpro (B1VA04)	KEGG (pal:PA0442)|KEGG GM (pal:PA0442)		NCBI (501327296)|EMBL (AM422018)
287	FlDop_00314 hypothetical protein
288	FlDop_00315 hypothetical protein	Uncharacterized protein		Uniprot (A0A660HNA4)|Interpro (A0A660HNA4)	KEGG (pzi:CWO85_03380)|KEGG GM (pzi:CWO85_03380)		EMBL (CP025121)
289	FlDop_00316 30S ribosomal protein S4	30S ribosomal protein S4	GO:0003735 - structural constituent of ribosome|GO:0005737 - cytoplasm|GO:0006412 - translation|GO:0015935 - small ribosomal subunit|GO:0019843 - rRNA binding	Uniprot (A0A660HNR1)|Interpro (A0A660HNR1)	KEGG (pzi:CWO85_03385)|KEGG GM (pzi:CWO85_03385)	Interpro (IPR022801)|Interpro (IPR001912)|Interpro (IPR005709)|Interpro (IPR018079)|Interpro (IPR002942)|Interpro (IPR036986)|Pfam (PF00163)|Pfam (PF01479)	EMBL (CP025121)
290	FlDop_00317 Cyclic di-AMP synthase CdaA	Diadenylate cyclase	GO:0004016 - adenylate cyclase activity|GO:0005524 - ATP binding|GO:0005886 - plasma membrane|GO:0006171 - cAMP biosynthetic process|GO:0016021 - integral component of membrane|GO:0016779 - nucleotidyltransferase activity|GO:0019932 - second-messenger-mediated signaling	Uniprot (A0A660HN97)|Interpro (A0A660HN97)	KEGG (pzi:CWO85_03390)|KEGG GM (pzi:CWO85_03390)|KEGG EC (2.7.7.85)	Interpro (IPR014046)|Interpro (IPR034701)|Interpro (IPR036888)|Interpro (IPR003390)|Pfam (PF02457)	EMBL (CP025121)
291	FlDop_00318 DegV domain-containing protein	EDD domain protein	GO:0008289 - lipid binding	Uniprot (A0A660HN96)|Interpro (A0A660HN96)	KEGG (pzi:CWO85_03395)|KEGG GM (pzi:CWO85_03395)	Interpro (IPR003797)|Interpro (IPR043168)|Pfam (PF02645)	EMBL (CP025121)
292	FlDop_00319 Large-conductance mechanosensitive channel	Large conductance mechanosensitive channel protein MscL	GO:0005886 - plasma membrane|GO:0008381 - mechanosensitive ion channel activity|GO:0016021 - integral component of membrane	Uniprot (A0A660HNH4)|Interpro (A0A660HNH4)	KEGG (pzi:CWO85_03400)|KEGG GM (pzi:CWO85_03400)	Interpro (IPR001185)|Interpro (IPR037673)|Interpro (IPR036019)|Pfam (PF01741)	EMBL (CP025121)
293	FlDop_00320 hypothetical protein	Uncharacterized protein	GO:0016021 - integral component of membrane	Uniprot (A0A660HNA1)|Interpro (A0A660HNA1)	KEGG (pzi:CWO85_03405)|KEGG GM (pzi:CWO85_03405)		EMBL (CP025121)
294	FlDop_00321 putative Hsp20 family chaperone	Molecular chaperone Hsp20		Uniprot (A0A660HND7)|Interpro (A0A660HND7)	KEGG (pzi:CWO85_03410)|KEGG GM (pzi:CWO85_03410)	Interpro (IPR002068)|Interpro (IPR031107)|Interpro (IPR008978)|Pfam (PF00011)	EMBL (CP025121)
295	FlDop_00326 hypothetical protein	Uncharacterized protein	GO:0016021 - integral component of membrane	Uniprot (A0A660HND1)|Interpro (A0A660HND1)	KEGG (pzi:CWO85_03435)|KEGG GM (pzi:CWO85_03435)		EMBL (CP025121)
296	FlDop_00327 ABC transporter substrate-binding protein	Probable ABC transporter periplasmic component (Showing similarities to Botulinum neurotoxin)	GO:0016021 - integral component of membrane	Uniprot (B3R0Q9)|Interpro (B3R0Q9)	KEGG (pml:ATP_00456)|KEGG GM (pml:ATP_00456)	Interpro (IPR039424)|Interpro (IPR000914)|Pfam (PF00496)	NCBI (501496326)|EMBL (CU469464)
297	FlDop_00328 ATP-dependent zinc metalloprotease FtsH	ATP-dependent zinc metalloprotease FtsH	GO:0004176 - ATP-dependent peptidase activity|GO:0004222 - metalloendopeptidase activity|GO:0005524 - ATP binding|GO:0005886 - plasma membrane|GO:0008270 - zinc ion binding|GO:0016021 - integral component of membrane|GO:0016887 - ATP hydrolysis activity|GO:0030163 - protein catabolic process	Uniprot (A0A2X0RUJ7)|Interpro (A0A2X0RUJ7)		Interpro (IPR003593)|Interpro (IPR041569)|Interpro (IPR003959)|Interpro (IPR003960)|Interpro (IPR005936)|Interpro (IPR027417)|Interpro (IPR000642)|Interpro (IPR037219)|Pfam (PF00004)|Pfam (PF17862)|Pfam (PF01434)	EMBL (LT999759)
298	FlDop_00329 hypothetical protein	Uncharacterized protein		Uniprot (A0A6V7GID0)|Interpro (A0A6V7GID0)
299	FlDop_00330 hypothetical protein	Uncharacterized protein	GO:0016021 - integral component of membrane	Uniprot (A8QWF3)|Interpro (A8QWF3)			NCBI (156187005)|EMBL (EF200540)
300	FlDop_00331 hypothetical protein
301	FlDop_00332 hypothetical protein	Uncharacterized protein	GO:0016021 - integral component of membrane	Uniprot (A0A660HNC0)|Interpro (A0A660HNC0)	KEGG (pzi:CWO85_03510)|KEGG GM (pzi:CWO85_03510)		EMBL (CP025121)
302	FlDop_00333 Citrate/malate transporter	Malate:citrate symporter	GO:0008514 - organic anion transmembrane transporter activity|GO:0016021 - integral component of membrane	Uniprot (A0A660HNT1)|Interpro (A0A660HNT1)	KEGG (pzi:CWO85_03515)|KEGG GM (pzi:CWO85_03515)	Interpro (IPR004679)|Pfam (PF03390)	EMBL (CP025121)
303	FlDop_00334 Methionine--tRNA ligase	Methionine--tRNA ligase	GO:0004825 - methionine-tRNA ligase activity|GO:0005524 - ATP binding|GO:0005737 - cytoplasm|GO:0006431 - methionyl-tRNA aminoacylation	Uniprot (A0A5N5XRI9)|Interpro (A0A5N5XRI9)		Interpro (IPR041872)|Interpro (IPR023457)|Interpro (IPR015413)|Interpro (IPR033911)|Interpro (IPR014729)|Interpro (IPR032678)|Interpro (IPR009080)|Pfam (PF19303)|Pfam (PF01406)|Pfam (PF09334)	EMBL (VWOH01000001)
304	FlDop_00335 Ribosomal RNA small subunit methyltransferase I	Ribosomal RNA small subunit methyltransferase I	GO:0000453 - enzyme-directed rRNA 2'-O-methylation|GO:0005737 - cytoplasm|GO:0070677 - rRNA (cytosine-2'-O-)-methyltransferase activity	Uniprot (A0A139JQL5)|Interpro (A0A139JQL5)		Interpro (IPR000878)|Interpro (IPR035996)|Interpro (IPR014777)|Interpro (IPR014776)|Interpro (IPR008189)|Interpro (IPR018063)|Pfam (PF00590)	NCBI (1054776861)|EMBL (LTBM01000012)
305	FlDop_00336 hypothetical protein	Uncharacterized protein		Uniprot (A0A0M1MZX8)|Interpro (A0A0M1MZX8)		Interpro (IPR027417)	NCBI (924546879)|EMBL (LHCF01000006)
306	FlDop_00337 Thymidylate kinase	Thymidylate kinase	GO:0004798 - thymidylate kinase activity|GO:0005524 - ATP binding|GO:0006233 - dTDP biosynthetic process|GO:0006235 - dTTP biosynthetic process	Uniprot (A0A5N5XTJ2)|Interpro (A0A5N5XTJ2)		Interpro (IPR027417)|Interpro (IPR039430)|Interpro (IPR018095)|Interpro (IPR018094)|Pfam (PF02223)	EMBL (VWXM01000002)
307	FlDop_00338 tRNA pseudouridine synthase A	tRNA pseudouridine synthase A	GO:0003723 - RNA binding|GO:0031119 - tRNA pseudouridine synthesis|GO:0106029 - tRNA pseudouridine synthase activity	Uniprot (A0A5N5XRL7)|Interpro (A0A5N5XRL7)		Interpro (IPR020103)|Interpro (IPR001406)|Interpro (IPR020097)|Interpro (IPR020095)|Interpro (IPR020094)|Pfam (PF01416)	EMBL (VWOH01000001)
308	FlDop_00339 Energy-coupling factor transporter transmembrane protein EcfT	ABC Transporter Permease Protein	GO:0016021 - integral component of membrane	Uniprot (A0A0M1N0A3)|Interpro (A0A0M1N0A3)		Interpro (IPR003339)|Pfam (PF02361)	NCBI (924546881)|EMBL (LHCF01000006)
309	FlDop_00340 Energy-coupling factor transporter ATP-binding protein EcfA2	ABC-type cobalt transport system ATPase component	GO:0005524 - ATP binding|GO:0016020 - membrane|GO:0055085 - transmembrane transport	Uniprot (A0A559KJM6)|Interpro (A0A559KJM6)		Interpro (IPR003593)|Interpro (IPR003439)|Interpro (IPR017871)|Interpro (IPR015856)|Interpro (IPR027417)|Pfam (PF00005)	EMBL (VIAE01000002)
310	FlDop_00341 Energy-coupling factor transporter ATP-binding protein EcfA1	Energy-coupling factor transporter ATPase	GO:0005524 - ATP binding|GO:0016020 - membrane|GO:0055085 - transmembrane transport	Uniprot (A0A660HLG1)|Interpro (A0A660HLG1)	KEGG (pzi:CWO85_00010)|KEGG GM (pzi:CWO85_00010)	Interpro (IPR003593)|Interpro (IPR003439)|Interpro (IPR017871)|Interpro (IPR015856)|Interpro (IPR027417)|Pfam (PF00005)	EMBL (CP025121)
311	FlDop_00342 50S ribosomal protein L17	50S ribosomal protein L17	GO:0003735 - structural constituent of ribosome|GO:0005840 - ribosome|GO:0006412 - translation	Uniprot (A0A660HLJ7)|Interpro (A0A660HLJ7)	KEGG (pzi:CWO85_00015)|KEGG GM (pzi:CWO85_00015)	Interpro (IPR000456)|Interpro (IPR036373)|Pfam (PF01196)	EMBL (CP025121)
312	FlDop_00343 DNA-directed RNA polymerase subunit alpha	DNA-directed RNA polymerase subunit alpha	GO:0003677 - DNA binding|GO:0003899 - DNA-directed 5'-3' RNA polymerase activity|GO:0006351 - transcription DNA-templated|GO:0046983 - protein dimerization activity	Uniprot (A0A660HMB4)|Interpro (A0A660HMB4)	KEGG (pzi:CWO85_00020)|KEGG GM (pzi:CWO85_00020)|KEGG EC (2.7.7.6)	Interpro (IPR011262)|Interpro (IPR011263)|Interpro (IPR011773)|Interpro (IPR036603)|Interpro (IPR011260)|Interpro (IPR036643)|Pfam (PF01000)|Pfam (PF03118)|Pfam (PF01193)	EMBL (CP025121)
313	FlDop_00344 30S ribosomal protein S11	30S ribosomal protein S11	GO:0003735 - structural constituent of ribosome|GO:0005840 - ribosome|GO:0006412 - translation|GO:0019843 - rRNA binding	Uniprot (A0A660HKY6)|Interpro (A0A660HKY6)	KEGG (pzi:CWO85_00025)|KEGG GM (pzi:CWO85_00025)	Interpro (IPR001971)|Interpro (IPR019981)|Interpro (IPR036967)|Pfam (PF00411)	EMBL (CP025121)
314	FlDop_00345 30S ribosomal protein S13	30S ribosomal protein S13	GO:0003723 - RNA binding|GO:0003735 - structural constituent of ribosome|GO:0005840 - ribosome|GO:0006412 - translation	Uniprot (A0A660HL35)|Interpro (A0A660HL35)	KEGG (pzi:CWO85_00030)|KEGG GM (pzi:CWO85_00030)	Interpro (IPR027437)|Interpro (IPR001892)|Interpro (IPR010979)|Interpro (IPR019980)|Interpro (IPR018269)|Pfam (PF00416)	EMBL (CP025121)
315	FlDop_00346 50S ribosomal protein L36
316	FlDop_00347 Translation initiation factor IF-1	Translation initiation factor IF-1	GO:0003743 - translation initiation factor activity	Uniprot (Q14RR4)|Interpro (Q14RR4)		Interpro (IPR012340)|Interpro (IPR006196)|Interpro (IPR004368)|Pfam (PF01176)	NCBI (110003551)|EMBL (AM238512)
317	FlDop_00348 Methionine aminopeptidase 1	Methionine aminopeptidase	GO:0046914 - transition metal ion binding|GO:0070006 - metalloaminopeptidase activity|GO:0070084 - protein initiator methionine removal	Uniprot (Q14RR5)|Interpro (Q14RR5)		Interpro (IPR036005)|Interpro (IPR000994)|Interpro (IPR001714)|Interpro (IPR002467)|Pfam (PF00557)	NCBI (110003550)|EMBL (AM238512)
318	FlDop_00349 Protein translocase subunit SecY	Protein translocase subunit SecY	GO:0005886 - plasma membrane|GO:0006605 - protein targeting|GO:0016021 - integral component of membrane|GO:0043952 - protein transport by the Sec complex|GO:0065002 - intracellular protein transmembrane transport	Uniprot (Q14RR6)|Interpro (Q14RR6)		Interpro (IPR026593)|Interpro (IPR002208)|Interpro (IPR030659)|Interpro (IPR023201)|Pfam (PF00344)	NCBI (110003549)|EMBL (AM238512)
319	FlDop_00350 50S ribosomal protein L15	50S ribosomal protein L15	GO:0003735 - structural constituent of ribosome|GO:0005737 - cytoplasm|GO:0006412 - translation|GO:0015934 - large ribosomal subunit|GO:0019843 - rRNA binding	Uniprot (I6U4B6)|Interpro (I6U4B6)		Interpro (IPR036227)|Interpro (IPR030878)|Interpro (IPR005749)|Interpro (IPR001196)|Interpro (IPR021131)|Pfam (PF00828)	NCBI (393010772)|EMBL (JN851863)
320	FlDop_00351 50S ribosomal protein L30	Ribosomal protein L30	GO:0003735 - structural constituent of ribosome|GO:0006412 - translation|GO:0015934 - large ribosomal subunit	Uniprot (I6ULR2)|Interpro (I6ULR2)		Interpro (IPR036919)|Interpro (IPR005996)|Interpro (IPR016082)|Pfam (PF00327)	NCBI (393010771)|EMBL (JN851863)
321	FlDop_00352 30S ribosomal protein S5	30S ribosomal protein S5	GO:0003735 - structural constituent of ribosome|GO:0005737 - cytoplasm|GO:0006412 - translation|GO:0015935 - small ribosomal subunit|GO:0019843 - rRNA binding	Uniprot (I6UVY0)|Interpro (I6UVY0)		Interpro (IPR000851)|Interpro (IPR005712)|Interpro (IPR005324)|Interpro (IPR020568)|Interpro (IPR014721)|Interpro (IPR013810)|Interpro (IPR018192)|Pfam (PF00333)|Pfam (PF03719)	NCBI (393010706)|EMBL (JN851859)
322	FlDop_00353 50S ribosomal protein L18	50S ribosomal protein L18	GO:0003735 - structural constituent of ribosome|GO:0005737 - cytoplasm|GO:0005840 - ribosome|GO:0006412 - translation|GO:0019843 - rRNA binding	Uniprot (I6TTT4)|Interpro (I6TTT4)		Interpro (IPR005484)|Interpro (IPR004389)|Pfam (PF00861)	NCBI (393010737)|EMBL (JN851861)
323	FlDop_00354 50S ribosomal protein L6	50S ribosomal protein L6	GO:0003735 - structural constituent of ribosome|GO:0005840 - ribosome|GO:0006412 - translation|GO:0019843 - rRNA binding	Uniprot (D3UT17)|Interpro (D3UT17)		Interpro (IPR000702)|Interpro (IPR020040)|Interpro (IPR036789)|Interpro (IPR019906)|Pfam (PF00347)	NCBI (393010768)|EMBL (FN811140)
324	FlDop_00355 30S ribosomal protein S8	30S ribosomal protein S8	GO:0003735 - structural constituent of ribosome|GO:0005840 - ribosome|GO:0006412 - translation|GO:0019843 - rRNA binding	Uniprot (I6U4B2)|Interpro (I6U4B2)		Interpro (IPR000630)|Interpro (IPR035987)|Pfam (PF00410)	NCBI (393010767)|EMBL (JN851863)
325	FlDop_00356 30S ribosomal protein S14	Ribosomal protein S14	GO:0003735 - structural constituent of ribosome|GO:0005840 - ribosome|GO:0006412 - translation	Uniprot (I6ULT8)|Interpro (I6ULT8)		Interpro (IPR001209)|Interpro (IPR043140)|Pfam (PF00253)	NCBI (393010766)|EMBL (JN851863)
326	FlDop_00357 50S ribosomal protein L5	50S ribosomal protein L5	GO:0000049 - tRNA binding|GO:0003735 - structural constituent of ribosome|GO:0005737 - cytoplasm|GO:0005840 - ribosome|GO:0006412 - translation|GO:0019843 - rRNA binding	Uniprot (I6UVX6)|Interpro (I6UVX6)		Interpro (IPR002132)|Interpro (IPR020930)|Interpro (IPR031309)|Interpro (IPR022803)|Interpro (IPR031310)|Pfam (PF00281)|Pfam (PF00673)	NCBI (393010765)|EMBL (JN851863)
327	FlDop_00358 50S ribosomal protein L24	50S ribosomal protein L24	GO:0003735 - structural constituent of ribosome|GO:0005840 - ribosome|GO:0006412 - translation|GO:0019843 - rRNA binding	Uniprot (I6TTQ5)|Interpro (I6TTQ5)		Interpro (IPR041988)|Interpro (IPR014722)|Interpro (IPR003256)|Interpro (IPR008991)|Pfam (PF17136)	NCBI (393010764)|EMBL (JN851863)
328	FlDop_00359 50S ribosomal protein L14	50S ribosomal protein L14	GO:0003735 - structural constituent of ribosome|GO:0005737 - cytoplasm|GO:0006412 - translation|GO:0015934 - large ribosomal subunit|GO:0019843 - rRNA binding	Uniprot (I6UYB3)|Interpro (I6UYB3)		Interpro (IPR036853)|Interpro (IPR000218)|Interpro (IPR005745)|Interpro (IPR019972)|Pfam (PF00238)	NCBI (393010763)|EMBL (JN851863)
329	FlDop_00360 30S ribosomal protein S17	30S ribosomal protein S17	GO:0003735 - structural constituent of ribosome|GO:0005840 - ribosome|GO:0006412 - translation|GO:0019843 - rRNA binding	Uniprot (I6U4A8)|Interpro (I6U4A8)		Interpro (IPR012340)|Interpro (IPR019984)|Interpro (IPR000266)|Pfam (PF00366)	NCBI (393010698)|EMBL (JN851859)
330	FlDop_00361 50S ribosomal protein L29	50S ribosomal protein L29	GO:0003735 - structural constituent of ribosome|GO:0005840 - ribosome|GO:0006412 - translation	Uniprot (I6ULW2)|Interpro (I6ULW2)		Interpro (IPR001854)|Interpro (IPR036049)|Pfam (PF00831)	NCBI (393010761)|EMBL (JN851863)
331	FlDop_00362 50S ribosomal protein L16	50S ribosomal protein L16	GO:0000049 - tRNA binding|GO:0003735 - structural constituent of ribosome|GO:0005737 - cytoplasm|GO:0005840 - ribosome|GO:0006412 - translation|GO:0019843 - rRNA binding	Uniprot (I6UW18)|Interpro (I6UW18)		Interpro (IPR016180)|Interpro (IPR036920)|Interpro (IPR000114)|Interpro (IPR020798)|Pfam (PF00252)	NCBI (393010760)|EMBL (JN851863)
332	FlDop_00363 30S ribosomal protein S3	30S ribosomal protein S3	GO:0003729 - mRNA binding|GO:0003735 - structural constituent of ribosome|GO:0005840 - ribosome|GO:0006412 - translation|GO:0019843 - rRNA binding	Uniprot (Q8VL42)|Interpro (Q8VL42)		Interpro (IPR015946)|Interpro (IPR004044)|Interpro (IPR009019)|Interpro (IPR005704)|Interpro (IPR001351)|Interpro (IPR036419)|Interpro (IPR018280)|Pfam (PF07650)|Pfam (PF00189)	NCBI (27734509)|EMBL (AF396951)
333	FlDop_00364 50S ribosomal protein L22	50S ribosomal protein L22	GO:0003735 - structural constituent of ribosome|GO:0006412 - translation|GO:0015934 - large ribosomal subunit|GO:0019843 - rRNA binding	Uniprot (Q79M14)|Interpro (Q79M14)		Interpro (IPR001063)|Interpro (IPR036394)|Interpro (IPR005727)|Pfam (PF00237)	NCBI (973744727)|EMBL (KR350645)
334	FlDop_00365 30S ribosomal protein S19	30S ribosomal protein S19	GO:0003735 - structural constituent of ribosome|GO:0006412 - translation|GO:0015935 - small ribosomal subunit|GO:0019843 - rRNA binding	Uniprot (A0A660HMD3)|Interpro (A0A660HMD3)	KEGG (pzi:CWO85_00130)|KEGG GM (pzi:CWO85_00130)	Interpro (IPR002222)|Interpro (IPR005732)|Interpro (IPR023575)|Pfam (PF00203)	EMBL (CP025121)
335	FlDop_00366 50S ribosomal protein L2	50S ribosomal protein L2	GO:0003735 - structural constituent of ribosome|GO:0006412 - translation|GO:0015934 - large ribosomal subunit|GO:0016740 - transferase activity|GO:0019843 - rRNA binding	Uniprot (A0A660HLM1)|Interpro (A0A660HLM1)	KEGG (pzi:CWO85_00135)|KEGG GM (pzi:CWO85_00135)	Interpro (IPR012340)|Interpro (IPR022666)|Interpro (IPR014722)|Interpro (IPR002171)|Interpro (IPR005880)|Interpro (IPR022669)|Interpro (IPR022671)|Interpro (IPR014726)|Interpro (IPR008991)|Pfam (PF00181)|Pfam (PF03947)	EMBL (CP025121)
336	FlDop_00367 50S ribosomal protein L23	50S ribosomal protein L23	GO:0003735 - structural constituent of ribosome|GO:0005737 - cytoplasm|GO:0005840 - ribosome|GO:0006412 - translation|GO:0019843 - rRNA binding	Uniprot (A0A660HLM3)|Interpro (A0A660HLM3)	KEGG (pzi:CWO85_00140)|KEGG GM (pzi:CWO85_00140)	Interpro (IPR012677)|Interpro (IPR012678)|Interpro (IPR013025)|Pfam (PF00276)	EMBL (CP025121)
337	FlDop_00368 50S ribosomal protein L4	50S ribosomal protein L4	GO:0003735 - structural constituent of ribosome|GO:0005737 - cytoplasm|GO:0005840 - ribosome|GO:0006412 - translation|GO:0019843 - rRNA binding	Uniprot (A0A660HM46)|Interpro (A0A660HM46)	KEGG (pzi:CWO85_00145)|KEGG GM (pzi:CWO85_00145)	Interpro (IPR002136)|Interpro (IPR023574)|Interpro (IPR013005)|Pfam (PF00573)	EMBL (CP025121)
338	FlDop_00369 50S ribosomal protein L3	50S ribosomal protein L3	GO:0003735 - structural constituent of ribosome|GO:0005840 - ribosome|GO:0006412 - translation|GO:0019843 - rRNA binding	Uniprot (A0A660HLM0)|Interpro (A0A660HLM0)	KEGG (pzi:CWO85_00150)|KEGG GM (pzi:CWO85_00150)	Interpro (IPR000597)|Interpro (IPR019927)|Interpro (IPR009000)|Pfam (PF00297)	EMBL (CP025121)
339	FlDop_00370 30S ribosomal protein S10	30S ribosomal protein S10	GO:0000049 - tRNA binding|GO:0003735 - structural constituent of ribosome|GO:0005737 - cytoplasm|GO:0005840 - ribosome|GO:0006412 - translation	Uniprot (A0A660HLL7)|Interpro (A0A660HLL7)	KEGG (pzi:CWO85_00155)|KEGG GM (pzi:CWO85_00155)	Interpro (IPR001848)|Interpro (IPR027486)|Interpro (IPR036838)|Pfam (PF00338)	EMBL (CP025121)
340	FlDop_00371 Ribosomal RNA small subunit methyltransferase H	Ribosomal RNA small subunit methyltransferase H	GO:0005737 - cytoplasm|GO:0070475 - rRNA base methylation|GO:0071424 - rRNA (cytosine-N4-)-methyltransferase activity	Uniprot (A0A660HLS8)|Interpro (A0A660HLS8)	KEGG (pzi:CWO85_00160)|KEGG GM (pzi:CWO85_00160)|KEGG EC (2.1.1.199)	Interpro (IPR002903)|Interpro (IPR023397)|Interpro (IPR029063)|Pfam (PF01795)	EMBL (CP025121)
341	FlDop_00372 DNA-directed RNA polymerase subunit omega	DNA-directed RNA polymerase subunit omega	GO:0003677 - DNA binding|GO:0003899 - DNA-directed 5'-3' RNA polymerase activity|GO:0006351 - transcription DNA-templated	Uniprot (A0A660HLL6)|Interpro (A0A660HLL6)	KEGG (pzi:CWO85_00165)|KEGG GM (pzi:CWO85_00165)|KEGG EC (2.7.7.6)	Interpro (IPR003716)|Interpro (IPR006110)|Interpro (IPR036161)|Pfam (PF01192)	EMBL (CP025121)
342	FlDop_00373 Guanylate kinase	Guanylate kinase	GO:0004385 - guanylate kinase activity|GO:0005524 - ATP binding|GO:0005737 - cytoplasm	Uniprot (A0A660HLN7)|Interpro (A0A660HLN7)	KEGG (pzi:CWO85_00170)|KEGG GM (pzi:CWO85_00170)|KEGG EC (2.7.4.8)	Interpro (IPR008145)|Interpro (IPR008144)|Interpro (IPR017665)|Interpro (IPR020590)|Interpro (IPR027417)|Pfam (PF00625)	EMBL (CP025121)
343	FlDop_00374 Leucine--tRNA ligase	Leucine--tRNA ligase	GO:0002161 - aminoacyl-tRNA editing activity|GO:0004823 - leucine-tRNA ligase activity|GO:0005524 - ATP binding|GO:0005737 - cytoplasm|GO:0006429 - leucyl-tRNA aminoacylation	Uniprot (A0A660HLN6)|Interpro (A0A660HLN6)	KEGG (pzi:CWO85_00175)|KEGG GM (pzi:CWO85_00175)|KEGG EC (6.1.1.4)	Interpro (IPR002300)|Interpro (IPR002302)|Interpro (IPR025709)|Interpro (IPR013155)|Interpro (IPR015413)|Interpro (IPR014729)|Interpro (IPR009080)|Interpro (IPR009008)|Pfam (PF08264)|Pfam (PF00133)|Pfam (PF13603)|Pfam (PF09334)	EMBL (CP025121)
344	FlDop_00375 Acyl carrier protein	Acyl carrier protein	GO:0000036 - acyl carrier activity|GO:0005737 - cytoplasm	Uniprot (A0A660HNC8)|Interpro (A0A660HNC8)	KEGG (pzi:CWO85_00180)|KEGG GM (pzi:CWO85_00180)	Interpro (IPR036736)|Interpro (IPR003231)|Interpro (IPR009081)|Pfam (PF14573)	EMBL (CP025121)
345	FlDop_00376 YqaJ viral recombinase family protein	Endonuclease (YqaJ viral recombinase family protein)	GO:0004519 - endonuclease activity	Uniprot (A0A660HME3)|Interpro (A0A660HME3)	KEGG (pzi:CWO85_00185)|KEGG GM (pzi:CWO85_00185)	Interpro (IPR011604)|Interpro (IPR017482)|Interpro (IPR011335)|Interpro (IPR019080)|Pfam (PF09588)	EMBL (CP025121)
346	FlDop_00377 Arginine--tRNA ligase	Arginine--tRNA ligase	GO:0004814 - arginine-tRNA ligase activity|GO:0005524 - ATP binding|GO:0005737 - cytoplasm|GO:0006420 - arginyl-tRNA aminoacylation	Uniprot (A0A660HLN3)|Interpro (A0A660HLN3)	KEGG (pzi:CWO85_00190)|KEGG GM (pzi:CWO85_00190)|KEGG EC (6.1.1.19)	Interpro (IPR001278)|Interpro (IPR036695)|Interpro (IPR035684)|Interpro (IPR008909)|Interpro (IPR014729)|Interpro (IPR009080)|Pfam (PF05746)|Pfam (PF00750)	EMBL (CP025121)
347	FlDop_00378 Ribosomal large subunit pseudouridine synthase D	Pseudouridine synthase	GO:0000455 - enzyme-directed rRNA pseudouridine synthesis|GO:0003723 - RNA binding|GO:0120159 - rRNA pseudouridine synthase activity	Uniprot (A0A660HLN8)|Interpro (A0A660HLN8)	KEGG (pzi:CWO85_00195)|KEGG GM (pzi:CWO85_00195)|KEGG EC (5.4.99.23)	Interpro (IPR020103)|Interpro (IPR006225)|Interpro (IPR006224)|Interpro (IPR006145)|Interpro (IPR002942)|Interpro (IPR036986)|Pfam (PF00849)|Pfam (PF01479)	EMBL (CP025121)
348	FlDop_00379 ATP-dependent zinc metalloprotease FtsH	ATP-dependent zinc metalloprotease FtsH	GO:0004176 - ATP-dependent peptidase activity|GO:0004222 - metalloendopeptidase activity|GO:0005524 - ATP binding|GO:0005886 - plasma membrane|GO:0008270 - zinc ion binding|GO:0016021 - integral component of membrane|GO:0016887 - ATP hydrolysis activity|GO:0030163 - protein catabolic process	Uniprot (A0A2X0QNK6)|Interpro (A0A2X0QNK6)		Interpro (IPR003593)|Interpro (IPR041569)|Interpro (IPR003959)|Interpro (IPR003960)|Interpro (IPR005936)|Interpro (IPR027417)|Interpro (IPR000642)|Interpro (IPR037219)|Pfam (PF00004)|Pfam (PF17862)|Pfam (PF01434)	EMBL (LT999760)
349	FlDop_00380 Serine--tRNA ligase	Serine--tRNA ligase	GO:0004828 - serine-tRNA ligase activity|GO:0005524 - ATP binding|GO:0005737 - cytoplasm|GO:0006434 - seryl-tRNA aminoacylation|GO:0016260 - selenocysteine biosynthetic process|GO:0097056 - selenocysteinyl-tRNA(Sec) biosynthetic process	Uniprot (A0A660HM58)|Interpro (A0A660HM58)	KEGG (pzi:CWO85_00205)|KEGG GM (pzi:CWO85_00205)|KEGG EC (6.1.1.11)	Interpro (IPR002314)|Interpro (IPR006195)|Interpro (IPR045864)|Interpro (IPR002317)|Interpro (IPR015866)|Interpro (IPR042103)|Interpro (IPR033729)|Interpro (IPR010978)|Pfam (PF02403)|Pfam (PF00587)	EMBL (CP025121)
350	FlDop_00381 30S ribosomal protein S20	30S ribosomal protein S20	GO:0003735 - structural constituent of ribosome|GO:0005840 - ribosome|GO:0006412 - translation|GO:0019843 - rRNA binding	Uniprot (A0A660HLN4)|Interpro (A0A660HLN4)	KEGG (pzi:CWO85_00210)|KEGG GM (pzi:CWO85_00210)	Interpro (IPR002583)|Interpro (IPR036510)|Pfam (PF01649)	EMBL (CP025121)
351	FlDop_00382 hypothetical protein	Uncharacterized protein	GO:0016021 - integral component of membrane	Uniprot (A0A660HLN2)|Interpro (A0A660HLN2)	KEGG (pzi:CWO85_00215)|KEGG GM (pzi:CWO85_00215)		EMBL (CP025121)
352	FlDop_00383 hypothetical protein	Uncharacterized protein	GO:0016021 - integral component of membrane	Uniprot (A0A2S8NV08)|Interpro (A0A2S8NV08)			EMBL (PUUG01000016)
353	FlDop_00384 Glycerol-3-phosphate acyltransferase	Glycerol-3-phosphate acyltransferase	GO:0005886 - plasma membrane|GO:0008654 - phospholipid biosynthetic process|GO:0016021 - integral component of membrane|GO:0043772 - acyl-phosphate glycerol-3-phosphate acyltransferase activity	Uniprot (A0A660HMF8)|Interpro (A0A660HMF8)	KEGG (pzi:CWO85_00240)|KEGG GM (pzi:CWO85_00240)|KEGG EC (2.3.1.275)	Interpro (IPR003811)|Pfam (PF02660)	EMBL (CP025121)
354	FlDop_00386 Xaa-Pro aminopeptidase	AMP_N domain-containing protein	GO:0030145 - manganese ion binding|GO:0070006 - metalloaminopeptidase activity	Uniprot (A0A660HLP8)|Interpro (A0A660HLP8)	KEGG (pzi:CWO85_00250)|KEGG GM (pzi:CWO85_00250)|KEGG EC (3.4.11.9)	Interpro (IPR007865)|Interpro (IPR029149)|Interpro (IPR036005)|Interpro (IPR000994)|Interpro (IPR001131)|Pfam (PF05195)|Pfam (PF00557)	EMBL (CP025121)
355	FlDop_00387 50S ribosomal protein L33	50S ribosomal protein L33	GO:0003735 - structural constituent of ribosome|GO:0005840 - ribosome|GO:0006412 - translation	Uniprot (A0A660HLQ1)|Interpro (A0A660HLQ1)	KEGG (pzi:CWO85_00255)|KEGG GM (pzi:CWO85_00255)	Interpro (IPR038584)|Interpro (IPR001705)|Interpro (IPR018264)|Interpro (IPR011332)|Pfam (PF00471)	EMBL (CP025121)
356	FlDop_00388 DNA-binding protein HU	Uncharacterized protein	GO:0003677 - DNA binding	Uniprot (A0A660HM70)|Interpro (A0A660HM70)	KEGG (pzi:CWO85_00260)|KEGG GM (pzi:CWO85_00260)	Interpro (IPR000119)|Interpro (IPR010992)|Pfam (PF00216)	EMBL (CP025121)
357	FlDop_00389 Glycerol-3-phosphate dehydrogenase [NAD(P)+]	Glycerol-3-phosphate dehydrogenase [NAD(P)+]	GO:0004367 - glycerol-3-phosphate dehydrogenase|GO:0005975 - carbohydrate metabolic process|GO:0006650 - glycerophospholipid metabolic process|GO:0008654 - phospholipid biosynthetic process|GO:0009331 - glycerol-3-phosphate dehydrogenase complex|GO:0046167 - glycerol-3-phosphate biosynthetic process|GO:0046168 - glycerol-3-phosphate catabolic process|GO:0051287 - NAD binding|GO:0106257 - glycerol…	Uniprot (A0A660HLP7)|Interpro (A0A660HLP7)	KEGG (pzi:CWO85_00265)|KEGG GM (pzi:CWO85_00265)|KEGG EC (1.1.1.94)	Interpro (IPR008927)|Interpro (IPR013328)|Interpro (IPR006168)|Interpro (IPR006109)|Interpro (IPR011128)|Interpro (IPR036291)|Pfam (PF07479)|Pfam (PF01210)	EMBL (CP025121)
358	FlDop_00390 GTPase Der	GTPase Der	GO:0005525 - GTP binding|GO:0042254 - ribosome biogenesis	Uniprot (A0A660HLP3)|Interpro (A0A660HLP3)	KEGG (pzi:CWO85_00270)|KEGG GM (pzi:CWO85_00270)	Interpro (IPR031166)|Interpro (IPR006073)|Interpro (IPR016484)|Interpro (IPR032859)|Interpro (IPR015946)|Interpro (IPR027417)|Interpro (IPR005225)|Pfam (PF14714)|Pfam (PF01926)	EMBL (CP025121)
359	FlDop_00391 Proline--tRNA ligase	Proline--tRNA ligase	GO:0004827 - proline-tRNA ligase activity|GO:0005524 - ATP binding|GO:0005737 - cytoplasm|GO:0006433 - prolyl-tRNA aminoacylation	Uniprot (A0A660HLV4)|Interpro (A0A660HLV4)	KEGG (pzi:CWO85_00275)|KEGG GM (pzi:CWO85_00275)|KEGG EC (6.1.1.15)	Interpro (IPR002314)|Interpro (IPR006195)|Interpro (IPR045864)|Interpro (IPR004154)|Interpro (IPR036621)|Interpro (IPR002316)|Interpro (IPR004499)|Interpro (IPR016061)|Interpro (IPR017449)|Interpro (IPR033721)|Pfam (PF03129)|Pfam (PF09180)|Pfam (PF00587)	EMBL (CP025121)
360	FlDop_00392 S-adenosylmethionine synthase	Methionine adenosyltransferase	GO:0004478 - methionine adenosyltransferase activity|GO:0005524 - ATP binding|GO:0005737 - cytoplasm|GO:0006556 - S-adenosylmethionine biosynthetic process|GO:0006730 - one-carbon metabolic process|GO:0046872 - metal ion binding	Uniprot (A0A660HLP5)|Interpro (A0A660HLP5)	KEGG (pzi:CWO85_00280)|KEGG GM (pzi:CWO85_00280)|KEGG EC (2.5.1.6)	Interpro (IPR022631)|Interpro (IPR022630)|Interpro (IPR022629)|Interpro (IPR022628)|Interpro (IPR002133)|Interpro (IPR022636)|Pfam (PF02773)|Pfam (PF02772)|Pfam (PF00438)	EMBL (CP025121)
361	FlDop_00393 hypothetical protein	CSD domain-containing protein	GO:0003676 - nucleic acid binding	Uniprot (A0A660HLR4)|Interpro (A0A660HLR4)	KEGG (pzi:CWO85_00285)|KEGG GM (pzi:CWO85_00285)	Interpro (IPR002059)|Pfam (PF00313)	EMBL (CP025121)
362	FlDop_00396 30S ribosomal protein S15	30S ribosomal protein S15	GO:0003735 - structural constituent of ribosome|GO:0005737 - cytoplasm|GO:0005840 - ribosome|GO:0006412 - translation	Uniprot (A0A660HLQ8)|Interpro (A0A660HLQ8)	KEGG (pzi:CWO85_00300)|KEGG GM (pzi:CWO85_00300)	Interpro (IPR000589)|Interpro (IPR005290)|Interpro (IPR009068)|Pfam (PF00312)	EMBL (CP025121)
363	FlDop_00397 cyclic-di-AMP receptor	Transcriptional regulator cyclic-di-AMP receptor		Uniprot (A0A660HNC4)|Interpro (A0A660HNC4)	KEGG (pzi:CWO85_00305)|KEGG GM (pzi:CWO85_00305)	Interpro (IPR010375)|Interpro (IPR011322)|Interpro (IPR015867)|Pfam (PF06153)	EMBL (CP025121)
364	FlDop_00398 hemolysin III family protein	hemolysin III family protein	GO:0016021 - integral component of membrane	Uniprot (A0A660HMG9)|Interpro (A0A660HMG9)	KEGG (pzi:CWO85_00310)|KEGG GM (pzi:CWO85_00310)	Interpro (IPR004254)|Pfam (PF03006)	EMBL (CP025121)
365	FlDop_00399 Protein hit	Diadenosine tetraphosphate hydrolase	GO:0016787 - hydrolase activity	Uniprot (A0A660HLQ6)|Interpro (A0A660HLQ6)	KEGG (pzi:CWO85_00315)|KEGG GM (pzi:CWO85_00315)	Interpro (IPR019808)|Interpro (IPR001310)|Interpro (IPR011146)|Interpro (IPR036265)|Pfam (PF01230)	EMBL (CP025121)
366	FlDop_00400 Ribonuclease HIII	Ribonuclease	GO:0003723 - RNA binding|GO:0004523 - RNA-DNA hybrid ribonuclease activity|GO:0005737 - cytoplasm|GO:0046872 - metal ion binding	Uniprot (A0A660HLR3)|Interpro (A0A660HLR3)	KEGG (pzi:CWO85_00320)|KEGG GM (pzi:CWO85_00320)|KEGG EC (3.1.26.4)	Interpro (IPR001352)|Interpro (IPR024567)|Interpro (IPR004641)|Interpro (IPR024568)|Interpro (IPR012337)|Interpro (IPR036397)|Interpro (IPR012295)|Pfam (PF11858)|Pfam (PF01351)	EMBL (CP025121)
367	FlDop_00401 Uracil-DNA glycosylase	Uracil-DNA glycosylase	GO:0004844 - uracil DNA N-glycosylase activity|GO:0005737 - cytoplasm|GO:0006284 - base-excision repair	Uniprot (A0A660HM84)|Interpro (A0A660HM84)	KEGG (pzi:CWO85_00325)|KEGG GM (pzi:CWO85_00325)|KEGG EC (3.2.2.27)	Interpro (IPR002043)|Interpro (IPR018085)|Interpro (IPR005122)|Interpro (IPR036895)|Pfam (PF03167)	EMBL (CP025121)
368	FlDop_00402 Signal peptidase I	Signal peptidase I	GO:0004252 - serine-type endopeptidase activity|GO:0006465 - signal peptide processing|GO:0016021 - integral component of membrane	Uniprot (A0A660HLQ7)|Interpro (A0A660HLQ7)	KEGG (pzi:CWO85_00330)|KEGG GM (pzi:CWO85_00330)|KEGG EC (3.4.21.89)	Interpro (IPR036286)|Interpro (IPR015927)|Interpro (IPR019533)|Interpro (IPR001733)|Interpro (IPR027245)|Pfam (PF00717)	EMBL (CP025121)
369	FlDop_00403 hypothetical protein	Uncharacterized protein	GO:0003697 - single-stranded DNA binding|GO:0005524 - ATP binding|GO:0006281 - DNA repair	Uniprot (A0A660HLR0)|Interpro (A0A660HLR0)	KEGG (pzi:CWO85_00335)|KEGG GM (pzi:CWO85_00335)	Interpro (IPR001238)|Interpro (IPR027417)	EMBL (CP025121)
370	FlDop_00404 hypothetical protein	Signal peptidase I (htmp3)	GO:0004252 - serine-type endopeptidase activity|GO:0006465 - signal peptide processing|GO:0016021 - integral component of membrane	Uniprot (A0A660HLQ7)|Interpro (A0A660HLQ7)	KEGG (pzi:CWO85_00330)|KEGG GM (pzi:CWO85_00330)|KEGG EC (3.4.21.89)	Interpro (IPR036286)|Interpro (IPR015927)|Interpro (IPR019533)|Interpro (IPR001733)|Interpro (IPR027245)|Pfam (PF00717)	EMBL (CP025121)
371	FlDop_00405 AAA family ATPase	AAA family ATPase	GO:0003697 - single-stranded DNA binding|GO:0005524 - ATP binding|GO:0006281 - DNA repair	Uniprot (A0A660HLR0)|Interpro (A0A660HLR0)	KEGG (pzi:CWO85_00335)|KEGG GM (pzi:CWO85_00335)	Interpro (IPR001238)|Interpro (IPR027417)	EMBL (CP025121)
372	FlDop_00406 hypothetical protein	Uncharacterized protein		Uniprot (A0A660HLW6)|Interpro (A0A660HLW6)	KEGG (pzi:CWO85_00340)|KEGG GM (pzi:CWO85_00340)	Interpro (IPR025449)|Pfam (PF13835)	EMBL (CP025121)
373	FlDop_00407 Cof-type HAD-IIB family hydrolase	HAD family hydrolase	GO:0016791 - phosphatase activity	Uniprot (A0A660HLQ9)|Interpro (A0A660HLQ9)	KEGG (pzi:CWO85_00345)|KEGG GM (pzi:CWO85_00345)	Interpro (IPR036412)|Interpro (IPR006379)|Interpro (IPR023214)	EMBL (CP025121)
374	FlDop_00409 DAK2 domain-containing protein	Dak2 domain-containing protein	GO:0004371 - glycerone kinase activity|GO:0006071 - glycerol metabolic process	Uniprot (A0A660HLS5)|Interpro (A0A660HLS5)	KEGG (pzi:CWO85_00355)|KEGG GM (pzi:CWO85_00355)|KEGG EC (2.7.2.18)	Interpro (IPR019986)|Interpro (IPR004007)|Interpro (IPR036117)|Interpro (IPR033470)|Pfam (PF13684)|Pfam (PF02734)	EMBL (CP025121)
375	FlDop_00410 50S ribosomal protein L28	50S ribosomal protein L28	GO:0003735 - structural constituent of ribosome|GO:0005737 - cytoplasm|GO:0005840 - ribosome|GO:0006412 - translation	Uniprot (A0A660HLS1)|Interpro (A0A660HLS1)	KEGG (pzi:CWO85_00360)|KEGG GM (pzi:CWO85_00360)	Interpro (IPR034704)|Interpro (IPR026569)|Interpro (IPR037147)|Interpro (IPR001383)|Pfam (PF00830)	EMBL (CP025121)
376	FlDop_00411 Phosphatidate cytidylyltransferase	Phosphatidate cytidylyltransferase	GO:0004605 - phosphatidate cytidylyltransferase activity|GO:0016021 - integral component of membrane|GO:0016024 - CDP-diacylglycerol biosynthetic process	Uniprot (A0A660HMI1)|Interpro (A0A660HMI1)	KEGG (pzi:CWO85_00365)|KEGG GM (pzi:CWO85_00365)|KEGG EC (2.7.7.41)	Interpro (IPR000374)	EMBL (CP025121)
377	FlDop_00412 Ribosome-recycling factor	Ribosome recycling factor	GO:0006412 - translation	Uniprot (A0A660HLR8)|Interpro (A0A660HLR8)	KEGG (pzi:CWO85_00370)|KEGG GM (pzi:CWO85_00370)	Interpro (IPR002661)|Interpro (IPR023584)|Interpro (IPR036191)|Pfam (PF01765)	EMBL (CP025121)
378	FlDop_00413 Uridylate kinase	Uridylate kinase	GO:0005524 - ATP binding|GO:0005737 - cytoplasm|GO:0033862 - UMP kinase activity|GO:0044210 - 'de novo' CTP biosynthetic process	Uniprot (A0A660HLS6)|Interpro (A0A660HLS6)	KEGG (pzi:CWO85_00375)|KEGG GM (pzi:CWO85_00375)|KEGG EC (2.7.4.22)	Interpro (IPR036393)|Interpro (IPR001048)|Interpro (IPR011817)|Interpro (IPR015963)|Pfam (PF00696)	EMBL (CP025121)
379	FlDop_00414 Elongation factor Ts	Elongation factor Ts	GO:0003746 - translation elongation factor activity|GO:0005737 - cytoplasm	Uniprot (A0A660HM94)|Interpro (A0A660HM94)	KEGG (pzi:CWO85_00380)|KEGG GM (pzi:CWO85_00380)	Interpro (IPR036402)|Interpro (IPR001816)|Interpro (IPR014039)|Interpro (IPR009060)|Pfam (PF00889)	EMBL (CP025121)
380	FlDop_00415 30S ribosomal protein S2	30S ribosomal protein S2	GO:0003735 - structural constituent of ribosome|GO:0006412 - translation|GO:0015935 - small ribosomal subunit	Uniprot (A0A660HLS3)|Interpro (A0A660HLS3)	KEGG (pzi:CWO85_00385)|KEGG GM (pzi:CWO85_00385)	Interpro (IPR001865)|Interpro (IPR005706)|Interpro (IPR023591)|Pfam (PF00318)	EMBL (CP025121)
381	FlDop_00416 Deoxyuridine 5'-triphosphate nucleotidohydrolase	Deoxyuridine 5'-triphosphate nucleotidohydrolase	GO:0000287 - magnesium ion binding|GO:0004170 - dUTP diphosphatase activity|GO:0006226 - dUMP biosynthetic process|GO:0046081 - dUTP catabolic process	Uniprot (A0A660HLS0)|Interpro (A0A660HLS0)	KEGG (pzi:CWO85_00390)|KEGG GM (pzi:CWO85_00390)|KEGG EC (3.6.1.23)	Interpro (IPR029054)|Interpro (IPR036157)|Interpro (IPR008181)|Interpro (IPR033704)|Pfam (PF00692)	EMBL (CP025121)
382	FlDop_00417 Tyrosine recombinase XerC	Integrase	GO:0003677 - DNA binding|GO:0006310 - DNA recombination|GO:0015074 - DNA integration	Uniprot (A0A660HLX8)|Interpro (A0A660HLX8)	KEGG (pzi:CWO85_00395)|KEGG GM (pzi:CWO85_00395)	Interpro (IPR044068)|Interpro (IPR011010)|Interpro (IPR013762)|Interpro (IPR002104)|Interpro (IPR010998)|Interpro (IPR004107)|Pfam (PF02899)|Pfam (PF00589)	EMBL (CP025121)
383	FlDop_00418 S26 family signal peptidase	S26 family signal peptidase	GO:0016021 - integral component of membrane	Uniprot (A0A660HLR9)|Interpro (A0A660HLR9)	KEGG (pzi:CWO85_00400)|KEGG GM (pzi:CWO85_00400)	Interpro (IPR036286)	EMBL (CP025121)
384	FlDop_00419 Regulatory protein Spx	Transcriptional regulator Spx		Uniprot (A0A660HLT7)|Interpro (A0A660HLT7)	KEGG (pzi:CWO85_00405)|KEGG GM (pzi:CWO85_00405)	Interpro (IPR006660)|Interpro (IPR036249)|Interpro (IPR006504)|Pfam (PF03960)	EMBL (CP025121)
385	FlDop_00420 hypothetical membrane protein	Htmp4		Uniprot (A0A3Q9U4G4)|Interpro (A0A3Q9U4G4)
386	FlDop_00421 Ribosomal large subunit pseudouridine synthase B	Pseudouridine synthase	GO:0000455 - enzyme-directed rRNA pseudouridine synthesis|GO:0003723 - RNA binding|GO:0120159 - rRNA pseudouridine synthase activity	Uniprot (A0A660HMB0)|Interpro (A0A660HMB0)	KEGG (pzi:CWO85_01280)|KEGG GM (pzi:CWO85_01280)|KEGG EC (5.4.99.22)	Interpro (IPR042092)|Interpro (IPR020103)|Interpro (IPR006145)|Interpro (IPR000748)|Interpro (IPR018496)|Interpro (IPR002942)|Interpro (IPR036986)|Interpro (IPR020094)|Pfam (PF00849)|Pfam (PF01479)	EMBL (CP025121)
387	FlDop_00422 hypothetical protein	Uncharacterized protein		Uniprot (A0A2E0DLQ6)|Interpro (A0A2E0DLQ6)		Interpro (IPR027417)|Interpro (IPR011604)|Interpro (IPR038726)|Interpro (IPR011335)|Pfam (PF12705)	EMBL (NZXE01000050)
388	FlDop_00423 ATP-dependent zinc metalloprotease FtsH	ATP-dependent zinc metalloprotease FtsH	GO:0004176 - ATP-dependent peptidase activity|GO:0004222 - metalloendopeptidase activity|GO:0005524 - ATP binding|GO:0005886 - plasma membrane|GO:0008270 - zinc ion binding|GO:0016021 - integral component of membrane|GO:0016887 - ATP hydrolysis activity|GO:0030163 - protein catabolic process	Uniprot (A0A2X0QAH5)|Interpro (A0A2X0QAH5)		Interpro (IPR003593)|Interpro (IPR041569)|Interpro (IPR003959)|Interpro (IPR003960)|Interpro (IPR005936)|Interpro (IPR027417)|Interpro (IPR000642)|Interpro (IPR037219)|Pfam (PF00004)|Pfam (PF17862)|Pfam (PF01434)	EMBL (LT999761)
389	FlDop_00424 hypothetical protein	Uncharacterized protein	GO:0008168 - methyltransferase activity|GO:0016021 - integral component of membrane|GO:0032259 - methylation	Uniprot (A0A660HM81)|Interpro (A0A660HM81)	KEGG (pzi:CWO85_01150)|KEGG GM (pzi:CWO85_01150)	Interpro (IPR001737)|Interpro (IPR029063)|Pfam (PF00398)	EMBL (CP025121)
390	FlDop_00425 Trigger factor	Trigger factor	GO:0003755 - peptidyl-prolyl cis-trans isomerase activity|GO:0005737 - cytoplasm|GO:0006457 - protein folding|GO:0007049 - cell cycle|GO:0015031 - protein transport|GO:0051301 - cell division	Uniprot (A0A660HMP7)|Interpro (A0A660HMP7)	KEGG (pzi:CWO85_01145)|KEGG GM (pzi:CWO85_01145)	Interpro (IPR001179)|Interpro (IPR005215)|Interpro (IPR008880)|Interpro (IPR037041)|Interpro (IPR008881)|Interpro (IPR036611)|Interpro (IPR027304)|Pfam (PF00254)|Pfam (PF05698)|Pfam (PF05697)	EMBL (CP025121)
391	FlDop_00426 Lon protease 1	Lon protease	GO:0004176 - ATP-dependent peptidase activity|GO:0004252 - serine-type endopeptidase activity|GO:0005524 - ATP binding|GO:0005737 - cytoplasm|GO:0016887 - ATP hydrolysis activity|GO:0030163 - protein catabolic process	Uniprot (A0A5N5XVR0)|Interpro (A0A5N5XVR0)		Interpro (IPR003593)|Interpro (IPR003959)|Interpro (IPR004815)|Interpro (IPR008269)|Interpro (IPR027065)|Interpro (IPR003111)|Interpro (IPR027417)|Interpro (IPR008268)|Interpro (IPR015947)|Interpro (IPR020568)|Interpro (IPR014721)|Pfam (PF00004)|Pfam (PF05362)|Pfam (PF02190)	EMBL (VWXM01000003)
392	FlDop_00427 hypothetical protein	Uncharacterized protein	GO:0016021 - integral component of membrane	Uniprot (A0A660HM77)|Interpro (A0A660HM77)	KEGG (pzi:CWO85_01135)|KEGG GM (pzi:CWO85_01135)		EMBL (CP025121)
393	FlDop_00428 30S ribosomal protein S21	30S ribosomal protein S21	GO:0003735 - structural constituent of ribosome|GO:0005840 - ribosome|GO:0006412 - translation	Uniprot (A0A660HM71)|Interpro (A0A660HM71)	KEGG (pzi:CWO85_01130)|KEGG GM (pzi:CWO85_01130)	Interpro (IPR001911)|Interpro (IPR038380)|Pfam (PF01165)	EMBL (CP025121)
394	FlDop_00429 Endoribonuclease YbeY	Endoribonuclease YbeY	GO:0004222 - metalloendopeptidase activity|GO:0004521 - endoribonuclease activity|GO:0005737 - cytoplasm|GO:0006364 - rRNA processing|GO:0008270 - zinc ion binding	Uniprot (A0A660HMY6)|Interpro (A0A660HMY6)	KEGG (pzi:CWO85_01125)|KEGG GM (pzi:CWO85_01125)	Interpro (IPR023091)|Interpro (IPR002036)|Pfam (PF02130)	EMBL (CP025121)
395	FlDop_00430 GTPase Era	GTPase Era	GO:0003924 - GTPase activity|GO:0005525 - GTP binding|GO:0005737 - cytoplasm|GO:0005886 - plasma membrane|GO:0042274 - ribosomal small subunit biogenesis|GO:0070181 - small ribosomal subunit rRNA binding	Uniprot (A0A660HM83)|Interpro (A0A660HM83)	KEGG (pzi:CWO85_01120)|KEGG GM (pzi:CWO85_01120)	Interpro (IPR030388)|Interpro (IPR006073)|Interpro (IPR005662)|Interpro (IPR015946)|Interpro (IPR004044)|Interpro (IPR009019)|Interpro (IPR027417)|Interpro (IPR005225)|Pfam (PF07650)|Pfam (PF01926)	EMBL (CP025121)
396	FlDop_00431 Glycine--tRNA ligase	Glycine--tRNA ligase	GO:0004820 - glycine-tRNA ligase activity|GO:0005524 - ATP binding|GO:0005737 - cytoplasm|GO:0006426 - glycyl-tRNA aminoacylation	Uniprot (A0A660HM78)|Interpro (A0A660HM78)	KEGG (pzi:CWO85_01115)|KEGG GM (pzi:CWO85_01115)|KEGG EC (6.1.1.14)	Interpro (IPR002314)|Interpro (IPR006195)|Interpro (IPR045864)|Interpro (IPR004154)|Interpro (IPR036621)|Interpro (IPR027031)|Interpro (IPR033731)|Interpro (IPR002315)|Pfam (PF03129)|Pfam (PF00587)	EMBL (CP025121)
397	FlDop_00432 DNA primase (dnaG)	DNA primase	GO:0003677 - DNA binding|GO:0003896 - DNA primase activity|GO:0008270 - zinc ion binding|GO:1990077 - primosome complex	Uniprot (A0A660HM72)|Interpro (A0A660HM72)	KEGG (pzi:CWO85_01110)|KEGG GM (pzi:CWO85_01110)|KEGG EC (2.7.7.101)	Interpro (IPR013264)|Interpro (IPR037068)|Interpro (IPR006295)|Interpro (IPR036977)|Interpro (IPR034151)|Interpro (IPR006171)|Interpro (IPR002694)|Pfam (PF08275)|Pfam (PF01807)	EMBL (CP025121)
398	FlDop_00433 RNA polymerase sigma factor SigA (RpoD)	RNA polymerase sigma factor (RpoD)	GO:0003677 - DNA binding|GO:0006352 - DNA-templated transcription initiation|GO:0016987 - sigma factor activity	Uniprot (A0A660HMC3)|Interpro (A0A660HMC3)	KEGG (pzi:CWO85_01105)|KEGG GM (pzi:CWO85_01105)	Interpro (IPR014284)|Interpro (IPR000943)|Interpro (IPR009042)|Interpro (IPR007627)|Interpro (IPR007624)|Interpro (IPR007630)|Interpro (IPR013325)|Interpro (IPR013324)|Interpro (IPR036388)|Pfam (PF00140)|Pfam (PF04542)|Pfam (PF04539)|Pfam (PF04545)	EMBL (CP025121)
399	FlDop_00434 class I SAM-dependent methyltransferase TrmK	SAM-dependent methyltransferase	GO:0008168 - methyltransferase activity|GO:0032259 - methylation	Uniprot (A0A660HM60)|Interpro (A0A660HM60)	KEGG (pzi:CWO85_01100)|KEGG GM (pzi:CWO85_01100)|KEGG EC (2.1.1.217)	Interpro (IPR029063)	EMBL (CP025121)
400	FlDop_00436 50S ribosomal protein L32	50S ribosomal protein L32	GO:0003735 - structural constituent of ribosome|GO:0006412 - translation|GO:0015934 - large ribosomal subunit	Uniprot (A0A660HM75)|Interpro (A0A660HM75)	KEGG (pzi:CWO85_01090)|KEGG GM (pzi:CWO85_01090)	Interpro (IPR002677)|Interpro (IPR044957)|Interpro (IPR011332)|Pfam (PF01783)	EMBL (CP025121)
401	FlDop_00437 Alanine--tRNA ligase	Alanine--tRNA ligase	GO:0000049 - tRNA binding|GO:0004813 - alanine-tRNA ligase activity|GO:0005524 - ATP binding|GO:0005737 - cytoplasm|GO:0006419 - alanyl-tRNA aminoacylation|GO:0008270 - zinc ion binding	Uniprot (A0A660HNF9)|Interpro (A0A660HNF9)	KEGG (pzi:CWO85_01085)|KEGG GM (pzi:CWO85_01085)|KEGG EC (6.1.1.7)	Interpro (IPR045864)|Interpro (IPR002318)|Interpro (IPR018162)|Interpro (IPR018165)|Interpro (IPR018164)|Interpro (IPR023033)|Interpro (IPR003156)|Interpro (IPR018163)|Interpro (IPR009000)|Interpro (IPR012947)|Pfam (PF02272)|Pfam (PF01411)|Pfam (PF07973)	EMBL (CP025121)
402	FlDop_00438 Putative pre-16S rRNA nuclease	Putative pre-16S rRNA nuclease	GO:0000967 - rRNA 5'-end processing|GO:0004518 - nuclease activity|GO:0005737 - cytoplasm	Uniprot (A0A660HMN7)|Interpro (A0A660HMN7)	KEGG (pzi:CWO85_01080)|KEGG GM (pzi:CWO85_01080)	Interpro (IPR012337)|Interpro (IPR005227)|Interpro (IPR006641)|Interpro (IPR037027)|Pfam (PF03652)	EMBL (CP025121)
403	FlDop_00439 hypothetical protein	Uncharacterized protein	GO:0008171 - O-methyltransferase activity|GO:0032259 - methylation	Uniprot (A0A660HM68)|Interpro (A0A660HM68)	KEGG (pzi:CWO85_01075)|KEGG GM (pzi:CWO85_01075)	Interpro (IPR029063)|Interpro (IPR002935)|Pfam (PF01596)	EMBL (CP025121)
404	FlDop_00440 Transcription elongation factor GreA	Transcription elongation factor GreA	GO:0003677 - DNA binding|GO:0003746 - translation elongation factor activity|GO:0032784 - regulation of DNA-templated transcription elongation|GO:0070063 - RNA polymerase binding	Uniprot (A0A660HM62)|Interpro (A0A660HM62)	KEGG (pzi:CWO85_01070)|KEGG GM (pzi:CWO85_01070)	Interpro (IPR036953)|Interpro (IPR018151)|Interpro (IPR006359)|Interpro (IPR028624)|Interpro (IPR001437)|Interpro (IPR023459)|Interpro (IPR022691)|Interpro (IPR036805)|Pfam (PF01272)|Pfam (PF03449)	EMBL (CP025121)
405	FlDop_00441 Pyrophosphatase PpaX	YqeG family HAD IIIA-type phosphatase	GO:0008962 - phosphatidylglycerophosphatase activity	Uniprot (A0A660HMX4)|Interpro (A0A660HMX4)	KEGG (pzi:CWO85_01065)|KEGG GM (pzi:CWO85_01065)	Interpro (IPR036412)|Interpro (IPR006439)|Interpro (IPR006549)|Interpro (IPR023214)|Interpro (IPR010021)	EMBL (CP025121)
406	FlDop_00442 bis(5'-nucleosyl)-tetraphosphatase YqeK	Hydrolase	GO:0016787 - hydrolase activity	Uniprot (A0A660HM74)|Interpro (A0A660HM74)	KEGG (pzi:CWO85_01060)|KEGG GM (pzi:CWO85_01060)	Interpro (IPR005249)|Interpro (IPR003607)|Interpro (IPR006674)|Pfam (PF01966)	EMBL (CP025121)
407	FlDop_00443 Ribosomal RNA small subunit methyltransferase D	16S rRNA (Guanine(966)-N(2))-methyltransferase RsmD	GO:0003676 - nucleic acid binding|GO:0008168 - methyltransferase activity|GO:0031167 - rRNA methylation	Uniprot (A0A660HM67)|Interpro (A0A660HM67)	KEGG (pzi:CWO85_01055)|KEGG GM (pzi:CWO85_01055)|KEGG EC (2.1.1.171)	Interpro (IPR002052)|Interpro (IPR004398)|Interpro (IPR029063)	EMBL (CP025121)
408	FlDop_00444 hypothetical protein	YneF family protein	GO:0016021 - integral component of membrane	Uniprot (A0A660HM61)|Interpro (A0A660HM61)	KEGG (pzi:CWO85_01050)|KEGG GM (pzi:CWO85_01050)	Interpro (IPR005359)|Pfam (PF03672)	EMBL (CP025121)
409	FlDop_00445 hypothetical protein	Uncharacterized protein	GO:0016021 - integral component of membrane	Uniprot (A0A660HMB3)|Interpro (A0A660HMB3)	KEGG (pzi:CWO85_01045)|KEGG GM (pzi:CWO85_01045)		EMBL (CP025121)
410	FlDop_00446 OsmC family protein	OsmC family protein		Uniprot (A0A660HM47)|Interpro (A0A660HM47)	KEGG (pzi:CWO85_01040)|KEGG GM (pzi:CWO85_01040)|KEGG EC (1.11.1.28)	Interpro (IPR015946)|Interpro (IPR003718)|Interpro (IPR036102)|Pfam (PF02566)	EMBL (CP025121)
411	FlDop_00447 hypothetical protein
412	FlDop_00448 Cysteine desulfurase SufS	Cysteine desulfurase	GO:0006534 - cysteine metabolic process|GO:0008483 - transaminase activity|GO:0030170 - pyridoxal phosphate binding|GO:0031071 - cysteine desulfurase activity	Uniprot (A0A660HM59)|Interpro (A0A660HM59)	KEGG (pzi:CWO85_01025)|KEGG GM (pzi:CWO85_01025)|KEGG EC (2.8.1.7)	Interpro (IPR000192)|Interpro (IPR020578)|Interpro (IPR010970)|Interpro (IPR016454)|Interpro (IPR015424)|Interpro (IPR015421)|Interpro (IPR015422)|Pfam (PF00266)	EMBL (CP025121)
413	FlDop_00449 ATP-dependent zinc metalloprotease FtsH	Uncharacterized protein	GO:0005524 - ATP binding|GO:0016021 - integral component of membrane|GO:0016887 - ATP hydrolysis activity	Uniprot (A0A660HMX5)|Interpro (A0A660HMX5)	KEGG (pzi:CWO85_02530)|KEGG GM (pzi:CWO85_02530)	Interpro (IPR003593)|Interpro (IPR003959)|Interpro (IPR003960)|Interpro (IPR027417)|Pfam (PF00004)	EMBL (CP025121)
414	FlDop_00450 hypothetical protein
415	FlDop_00451 hypothetical protein
416	FlDop_00452 hypothetical protein	Uncharacterized protein
417	FlDop_00453 Restriction enzyme BgcI subunit beta	Methylase_S domain-containing protein	GO:0003677 - DNA binding	Uniprot (B1VA01)|Interpro (B1VA01)	KEGG (pal:PA0439)|KEGG GM (pal:PA0439)	Interpro (IPR000055)|Interpro (IPR044946)|Pfam (PF01420)	NCBI (501327294)|EMBL (AM422018)
418	FlDop_00454 Restriction enzyme BgcI subunit alpha	Restriction enzyme alpha subunit	GO:0003677 - DNA binding|GO:0006306 - DNA methylation|GO:0008170 - N-methyltransferase activity	Uniprot (B1VA00)|Interpro (B1VA00)	KEGG (pal:PA0438)|KEGG GM (pal:PA0438)|KEGG EC (2.1.1.72)	Interpro (IPR003356)|Interpro (IPR029063)|Pfam (PF02384)	NCBI (501327293)|EMBL (AM422018)
419	FlDop_00455 hypothetical protein	Restriction enzyme alpha subunit	GO:0003677 - DNA binding|GO:0006306 - DNA methylation|GO:0008170 - N-methyltransferase activity	Uniprot (B1VA00)|Interpro (B1VA00)	KEGG (pal:PA0438)|KEGG GM (pal:PA0438)|KEGG EC (2.1.1.72)	Interpro (IPR003356)|Interpro (IPR029063)|Pfam (PF02384)	NCBI (501327293)|EMBL (AM422018)
420	FlDop_00456 ATP binding protein (dnaI-like)	IstB_IS21 domain-containing protein	GO:0005524 - ATP binding	Uniprot (A0A660HMN6)|Interpro (A0A660HMN6)	KEGG (pzi:CWO85_00635)|KEGG GM (pzi:CWO85_00635)	Interpro (IPR002611)|Interpro (IPR027417)|Pfam (PF01695)	EMBL (CP025121)
421	FlDop_00457 Replication initiation and membrane attachment protein (dnaD)	DnaB_2 domain-containing protein		Uniprot (A0A660HLX2)|Interpro (A0A660HLX2)	KEGG (pzi:CWO85_00640)|KEGG GM (pzi:CWO85_00640)	Interpro (IPR006343)|Pfam (PF07261)	EMBL (CP025121)
422	FlDop_00458 Formamidopyrimidine-DNA glycosylase	DNA-formamidopyrimidine glycosylase	GO:0003684 - damaged DNA binding|GO:0003906 - DNA-(apurinic or apyrimidinic site) endonuclease activity|GO:0006284 - base-excision repair|GO:0008270 - zinc ion binding|GO:0008534 - oxidized purine nucleobase lesion DNA N-glycosylase activity|GO:0016829 - lyase activity	Uniprot (A0A660HLY5)|Interpro (A0A660HLY5)	KEGG (pzi:CWO85_00645)|KEGG GM (pzi:CWO85_00645)|KEGG EC (3.2.2.23)	Interpro (IPR015886)|Interpro (IPR015887)|Interpro (IPR020629)|Interpro (IPR012319)|Interpro (IPR035937)|Interpro (IPR010979)|Interpro (IPR000214)|Interpro (IPR010663)|Pfam (PF01149)|Pfam (PF06831)|Pfam (PF06827)	EMBL (CP025121)
423	FlDop_00459 hypothetical protein	Uncharacterized protein		Uniprot (A0A660HME4)|Interpro (A0A660HME4)	KEGG (pzi:CWO85_00650)|KEGG GM (pzi:CWO85_00650)		EMBL (CP025121)
424	FlDop_00460 Ribonuclease J 1	Ribonuclease J	GO:0003723 - RNA binding|GO:0004521 - endoribonuclease activity|GO:0004534 - 5'-3' exoribonuclease activity|GO:0005737 - cytoplasm|GO:0006364 - rRNA processing|GO:0008270 - zinc ion binding	Uniprot (A0A660HLY8)|Interpro (A0A660HLY8)	KEGG (pzi:CWO85_00655)|KEGG GM (pzi:CWO85_00655)	Interpro (IPR001279)|Interpro (IPR036866)|Interpro (IPR011108)|Interpro (IPR004613)|Interpro (IPR042173)|Interpro (IPR030854)|Interpro (IPR041636)|Pfam (PF00753)|Pfam (PF07521)|Pfam (PF17770)	EMBL (CP025121)
425	FlDop_00461 Ribonuclease J 2	MBL fold metallo-hydrolase	GO:0016787 - hydrolase activity	Uniprot (A0A660HLX6)|Interpro (A0A660HLX6)	KEGG (pzi:CWO85_00660)|KEGG GM (pzi:CWO85_00660)	Interpro (IPR036866)|Interpro (IPR042173)|Interpro (IPR041636)|Pfam (PF17770)	EMBL (CP025121)
426	FlDop_00462 Holliday junction resolvase RecU	Holliday junction resolvase RecU	GO:0000287 - magnesium ion binding|GO:0003676 - nucleic acid binding|GO:0005737 - cytoplasm|GO:0006281 - DNA repair|GO:0006310 - DNA recombination|GO:0007059 - chromosome segregation|GO:0008821 - crossover junction endodeoxyribonuclease activity	Uniprot (A0A660HM41)|Interpro (A0A660HM41)	KEGG (pzi:CWO85_00665)|KEGG GM (pzi:CWO85_00665)	Interpro (IPR004612)|Interpro (IPR011335)|Interpro (IPR011856)|Pfam (PF03838)	EMBL (CP025121)
427	FlDop_00463 hypothetical protein	Uncharacterized protein	GO:0016021 - integral component of membrane	Uniprot (A0A660HLX9)|Interpro (A0A660HLX9)	KEGG (pzi:CWO85_00670)|KEGG GM (pzi:CWO85_00670)		EMBL (CP025121)
428	FlDop_00464 hypothetical protein
429	FlDop_00465 restriction endonuclease subunit S	Methylase_S domain-containing protein	GO:0003677 - DNA binding	Uniprot (A0A151YXH1)|Interpro (A0A151YXH1)		Interpro (IPR000055)|Interpro (IPR044946)|Pfam (PF01420)	NCBI (1013862311)|EMBL (LSVF01000005)
430	FlDop_00466 site-specific integrase	Site-specific integrase	GO:0003677 - DNA binding|GO:0006310 - DNA recombination|GO:0015074 - DNA integration	Uniprot (A0A4Q2K8D4)|Interpro (A0A4Q2K8D4)		Interpro (IPR044068)|Interpro (IPR011010)|Interpro (IPR013762)|Interpro (IPR002104)|Interpro (IPR010998)|Interpro (IPR004107)|Pfam (PF14659)|Pfam (PF00589)	EMBL (SDOZ01000003)
431	FlDop_00467 Type-1 restriction enzyme R protein	Type I restriction enzyme R Protein	GO:0003677 - DNA binding|GO:0005524 - ATP binding|GO:0009035 - type I site-specific deoxyribonuclease activity|GO:0009307 - DNA restriction-modification system	Uniprot (A0A559UBW2)|Interpro (A0A559UBW2)		Interpro (IPR014001)|Interpro (IPR027417)|Interpro (IPR007409)|Interpro (IPR004473)|Interpro (IPR040980)|Interpro (IPR022625)|Pfam (PF12008)|Pfam (PF04313)|Pfam (PF18766)	EMBL (VISS01000009)
432	FlDop_00468 Type I restriction enzyme EcoKI M protein	Site-specific DNA-methyltransferase (adenine-specific)	GO:0003677 - DNA binding|GO:0008170 - N-methyltransferase activity|GO:0009007 - site-specific DNA-methyltransferase (adenine-specific) activity|GO:0009307 - DNA restriction-modification system	Uniprot (A0A660HNL4)|Interpro (A0A660HNL4)	KEGG (pzi:CWO85_02590)|KEGG GM (pzi:CWO85_02590)|KEGG EC (2.1.1.72)	Interpro (IPR022749)|Interpro (IPR038333)|Interpro (IPR003356)|Interpro (IPR002052)|Interpro (IPR004546)|Interpro (IPR029063)|Pfam (PF12161)|Pfam (PF02384)	EMBL (CP025121)
433	FlDop_00469 restriction endonuclease subunit S	restriction endonuclease subunit S	GO:0003677 - DNA binding|GO:0016021 - integral component of membrane	Uniprot (A0A660HMX7)|Interpro (A0A660HMX7)	KEGG (pzi:CWO85_02585)|KEGG GM (pzi:CWO85_02585)|KEGG EC (3.1.21.3)	Interpro (IPR000055)|Interpro (IPR044946)|Pfam (PF01420)	EMBL (CP025121)
434	FlDop_00470 hypothetical protein	Uncharacterized protein		Uniprot (A0A660HLZ2)|Interpro (A0A660HLZ2)	KEGG (pzi:CWO85_00675)|KEGG GM (pzi:CWO85_00675)		EMBL (CP025121)
435	FlDop_00471 hypothetical protein	Uncharacterized protein	GO:0016021 - integral component of membrane	Uniprot (A0A660HLZ0)|Interpro (A0A660HLZ0)	KEGG (pzi:CWO85_00680)|KEGG GM (pzi:CWO85_00680)		EMBL (CP025121)
436	FlDop_00472 hypothetical protein	Uncharacterized protein	GO:0016021 - integral component of membrane	Uniprot (A0A660HMP6)|Interpro (A0A660HMP6)	KEGG (pzi:CWO85_00685)|KEGG GM (pzi:CWO85_00685)		EMBL (CP025121)
437	FlDop_00473 ATP-dependent zinc metalloprotease FtsH	ATP-dependent Zn protease	GO:0005524 - ATP binding|GO:0008233 - peptidase activity|GO:0016021 - integral component of membrane|GO:0016887 - ATP hydrolysis activity	Uniprot (A0A660HLY4)|Interpro (A0A660HLY4)	KEGG (pzi:CWO85_00690)|KEGG GM (pzi:CWO85_00690)	Interpro (IPR003593)|Interpro (IPR003959)|Interpro (IPR027417)|Pfam (PF00004)	EMBL (CP025121)
438	FlDop_00474 hypothetical protein	Uncharacterized protein	GO:0016021 - integral component of membrane	Uniprot (A0A660HLZ7)|Interpro (A0A660HLZ7)	KEGG (pzi:CWO85_00695)|KEGG GM (pzi:CWO85_00695)		EMBL (CP025121)
439	FlDop_00475 hypothetical protein	Uncharacterized protein	GO:0016021 - integral component of membrane	Uniprot (A0A660HMF3)|Interpro (A0A660HMF3)	KEGG (pzi:CWO85_00700)|KEGG GM (pzi:CWO85_00700)		EMBL (CP025121)
440	FlDop_00476 IS3 family transposase	DNA-binding protein	GO:0003677 - DNA binding|GO:0015074 - DNA integration	Uniprot (A0A660HLZ8)|Interpro (A0A660HLZ8)	KEGG (pzi:CWO85_00705)|KEGG GM (pzi:CWO85_00705)	Interpro (IPR025948)|Interpro (IPR001584)|Interpro (IPR012337)|Interpro (IPR036397)|Pfam (PF13276)|Pfam (PF00665)	EMBL (CP025121)
441	FlDop_00477 Translation initiation factor IF-3	Translation initiation factor IF-3	GO:0003743 - translation initiation factor activity|GO:0005737 - cytoplasm	Uniprot (A0A660HLY6)|Interpro (A0A660HLY6)	KEGG (pzi:CWO85_00710)|KEGG GM (pzi:CWO85_00710)	Interpro (IPR036788)|Interpro (IPR036787)|Interpro (IPR001288)|Interpro (IPR019815)|Interpro (IPR019814)|Pfam (PF00707)|Pfam (PF05198)	EMBL (CP025121)
442	FlDop_00478 50S ribosomal protein L35	50S ribosomal protein L35	GO:0003735 - structural constituent of ribosome|GO:0005840 - ribosome|GO:0006412 - translation	Uniprot (A0A660HM51)|Interpro (A0A660HM51)	KEGG (pzi:CWO85_00715)|KEGG GM (pzi:CWO85_00715)	Interpro (IPR021137)|Interpro (IPR018265)|Interpro (IPR001706)|Interpro (IPR037229)|Pfam (PF01632)	EMBL (CP025121)
443	FlDop_00479 50S ribosomal protein L20	50S ribosomal protein L20	GO:0000027 - ribosomal large subunit assembly|GO:0003735 - structural constituent of ribosome|GO:0005737 - cytoplasm|GO:0005840 - ribosome|GO:0006353 - DNA-templated transcription termination|GO:0006412 - translation|GO:0019843 - rRNA binding	Uniprot (A0A660HLY9)|Interpro (A0A660HLY9)	KEGG (pzi:CWO85_00720)|KEGG GM (pzi:CWO85_00720)	Interpro (IPR011112)|Interpro (IPR005813)|Interpro (IPR035566)|Pfam (PF00453)	EMBL (CP025121)
444	FlDop_00480 hypothetical protein	Uncharacterized protein	GO:0016021 - integral component of membrane	Uniprot (A0A660HM01)|Interpro (A0A660HM01)	KEGG (pzi:CWO85_00725)|KEGG GM (pzi:CWO85_00725)		EMBL (CP025121)
445	FlDop_00481 M42 family metallopeptidase	M42 family metallopeptidase	GO:0004177 - aminopeptidase activity|GO:0046872 - metal ion binding	Uniprot (A0A660HM02)|Interpro (A0A660HM02)	KEGG (pzi:CWO85_00730)|KEGG GM (pzi:CWO85_00730)	Interpro (IPR008007)|Interpro (IPR023367)|Pfam (PF05343)	EMBL (CP025121)
446	FlDop_00482 50S ribosomal protein L34	50S ribosomal protein L34	GO:0003735 - structural constituent of ribosome|GO:0005840 - ribosome|GO:0006412 - translation	Uniprot (A0A660HMQ5)|Interpro (A0A660HMQ5)	KEGG (pzi:CWO85_00735)|KEGG GM (pzi:CWO85_00735)	Interpro (IPR000271)|Interpro (IPR020939)|Pfam (PF00468)	EMBL (CP025121)
447	FlDop_00483 Ribonuclease P protein component	Ribonuclease P protein component	GO:0000049 - tRNA binding|GO:0001682 - tRNA 5'-leader removal|GO:0004526 - ribonuclease P activity	Uniprot (A0A660HLZ5)|Interpro (A0A660HLZ5)	KEGG (pzi:CWO85_00740)|KEGG GM (pzi:CWO85_00740)|KEGG EC (3.1.26.5)	Interpro (IPR020568)|Interpro (IPR014721)|Interpro (IPR000100)|Interpro (IPR020539)|Pfam (PF00825)	EMBL (CP025121)
448	FlDop_00484 Membrane protein insertase YidC 2	Membrane protein insertase YidC 2	GO:0005886 - plasma membrane|GO:0015031 - protein transport|GO:0016021 - integral component of membrane|GO:0032977 - membrane insertase activity	Uniprot (A0A660HM06)|Interpro (A0A660HM06)	KEGG (pzi:CWO85_00745)|KEGG GM (pzi:CWO85_00745)	Interpro (IPR028055)|Interpro (IPR001708)|Pfam (PF02096)	EMBL (CP025121)
449	FlDop_00485 Citrate/malate transporter	Malate:citrate symporter	GO:0008514 - organic anion transmembrane transporter activity|GO:0016021 - integral component of membrane	Uniprot (A0A660HMG4)|Interpro (A0A660HMG4)	KEGG (pzi:CWO85_00750)|KEGG GM (pzi:CWO85_00750)	Interpro (IPR004679)|Pfam (PF03390)	EMBL (CP025121)
450	FlDop_00486 hypothetical protein	SBP_bac_5 domain-containing protein	GO:0016021 - integral component of membrane	Uniprot (A0A660HMX0)|Interpro (A0A660HMX0)	KEGG (pzi:CWO85_02625)|KEGG GM (pzi:CWO85_02625)	Interpro (IPR039424)|Interpro (IPR000914)|Pfam (PF00496)	EMBL (CP025121)
451	FlDop_00487 hypothetical protein
452	FlDop_00488 ATP-dependent zinc metalloprotease FtsH	ATP-dependent zinc metalloprotease FtsH	GO:0004176 - ATP-dependent peptidase activity|GO:0004222 - metalloendopeptidase activity|GO:0005524 - ATP binding|GO:0005886 - plasma membrane|GO:0008270 - zinc ion binding|GO:0016021 - integral component of membrane|GO:0016887 - ATP hydrolysis activity|GO:0030163 - protein catabolic process	Uniprot (A0A2X0QW87)|Interpro (A0A2X0QW87)		Interpro (IPR003593)|Interpro (IPR041569)|Interpro (IPR003959)|Interpro (IPR003960)|Interpro (IPR005936)|Interpro (IPR027417)|Interpro (IPR000642)|Interpro (IPR037219)|Pfam (PF00004)|Pfam (PF17862)|Pfam (PF01434)	EMBL (LT999762)
453	FlDop_00489 putative ABC transporter ATP-binding protein	Multidrug ABC transporter permease	GO:0005524 - ATP binding|GO:0016021 - integral component of membrane|GO:0140359 - ABC-type transporter activity	Uniprot (A0A660HLY1)|Interpro (A0A660HLY1)	KEGG (pzi:CWO85_00620)|KEGG GM (pzi:CWO85_00620)	Interpro (IPR003593)|Interpro (IPR011527)|Interpro (IPR036640)|Interpro (IPR003439)|Interpro (IPR027417)|Interpro (IPR039421)|Pfam (PF00664)|Pfam (PF00005)	EMBL (CP025121)
454	FlDop_00490 putative ABC transporter ATP-binding protein	ABC transporter ATP-binding protein	GO:0005524 - ATP binding|GO:0016021 - integral component of membrane|GO:0140359 - ABC-type transporter activity	Uniprot (A0A660HLW4)|Interpro (A0A660HLW4)	KEGG (pzi:CWO85_00615)|KEGG GM (pzi:CWO85_00615)	Interpro (IPR003593)|Interpro (IPR011527)|Interpro (IPR036640)|Interpro (IPR003439)|Interpro (IPR027417)|Interpro (IPR039421)|Pfam (PF00664)|Pfam (PF00005)	EMBL (CP025121)
455	FlDop_00491 60 kDa chaperonin GroEL	60 kDa chaperonin OS=Elm yellows phytoplasma OX=35774 GN=groEL PE=3 SV=1		Uniprot (A0A6M3YSF3)|Interpro (A0A6M3YSF3)
456	FlDop_00492 10 kDa chaperonin	10 kDa chaperonin	GO:0005524 - ATP binding|GO:0006457 - protein folding|GO:0016887 - ATP hydrolysis activity	Uniprot (A0A660HLW7)|Interpro (A0A660HLW7)	KEGG (pzi:CWO85_00605)|KEGG GM (pzi:CWO85_00605)	Interpro (IPR020818)|Interpro (IPR037124)|Interpro (IPR011032)|Pfam (PF00166)	EMBL (CP025121)
457	FlDop_00493 ABC transporter ATP-binding protein YxdL	Lipoprotein ABC transporter ATP-binding protein	GO:0005524 - ATP binding|GO:0016021 - integral component of membrane	Uniprot (A0A660HLX5)|Interpro (A0A660HLX5)	KEGG (pzi:CWO85_00600)|KEGG GM (pzi:CWO85_00600)	Interpro (IPR003593)|Interpro (IPR003439)|Interpro (IPR017871)|Interpro (IPR017911)|Interpro (IPR027417)|Pfam (PF00005)	EMBL (CP025121)
458	FlDop_00494 Adenylate kinase	Adenylate kinase	GO:0004017 - adenylate kinase activity|GO:0005524 - ATP binding|GO:0005737 - cytoplasm|GO:0008270 - zinc ion binding|GO:0044209 - AMP salvage	Uniprot (A0A660HMD4)|Interpro (A0A660HMD4)	KEGG (pzi:CWO85_00595)|KEGG GM (pzi:CWO85_00595)|KEGG EC (2.7.4.3)	Interpro (IPR006259)|Interpro (IPR000850)|Interpro (IPR033690)|Interpro (IPR007862)|Interpro (IPR027417)|Pfam (PF05191)	EMBL (CP025121)
459	FlDop_00495 ATP-dependent zinc metalloprotease FtsH	AAA domain-containing protein	GO:0005524 - ATP binding|GO:0016021 - integral component of membrane|GO:0016887 - ATP hydrolysis activity	Uniprot (A0A660HLX7)|Interpro (A0A660HLX7)	KEGG (pzi:CWO85_00590)|KEGG GM (pzi:CWO85_00590)	Interpro (IPR003593)|Interpro (IPR003959)|Interpro (IPR003960)|Interpro (IPR027417)|Pfam (PF00004)	EMBL (CP025121)
460	FlDop_00496 ATP-dependent DNA helicase RecG	ATP-dependent DNA helicase	GO:0003676 - nucleic acid binding|GO:0004386 - helicase activity|GO:0005524 - ATP binding	Uniprot (A0A660HLW2)|Interpro (A0A660HLW2)	KEGG (pzi:CWO85_00585)|KEGG GM (pzi:CWO85_00585)|KEGG EC (5.6.2.4)	Interpro (IPR011545)|Interpro (IPR014001)|Interpro (IPR001650)|Interpro (IPR012340)|Interpro (IPR027417)|Pfam (PF00270)|Pfam (PF00271)	EMBL (CP025121)
461	FlDop_00497 Phosphate acyltransferase	Phosphate acyltransferase	GO:0005737 - cytoplasm|GO:0006633 - fatty acid biosynthetic process|GO:0008654 - phospholipid biosynthetic process|GO:0043811 - phosphate:acyl-	Uniprot (A0A660HMM5)|Interpro (A0A660HMM5)	KEGG (pzi:CWO85_00580)|KEGG GM (pzi:CWO85_00580)|KEGG EC (2.3.1.274)	Interpro (IPR003664)|Interpro (IPR012281)|Pfam (PF02504)	EMBL (CP025121)
462	FlDop_00498 Ribonuclease 3	Ribonuclease 3	GO:0004525 - ribonuclease III activity|GO:0005737 - cytoplasm|GO:0006364 - rRNA processing|GO:0006397 - mRNA processing|GO:0008033 - tRNA processing|GO:0016075 - rRNA catabolic process|GO:0019843 - rRNA binding|GO:0046872 - metal ion binding	Uniprot (A0A660HLW8)|Interpro (A0A660HLW8)	KEGG (pzi:CWO85_00575)|KEGG GM (pzi:CWO85_00575)|KEGG EC (3.1.26.3)	Interpro (IPR014720)|Interpro (IPR011907)|Interpro (IPR000999)|Interpro (IPR036389)|Pfam (PF00035)|Pfam (PF14622)	EMBL (CP025121)
463	FlDop_00499 DnaD domain protein	Chromosome replication initiation protein		Uniprot (A0A6M3YS54)|Interpro (A0A6M3YS54)		Interpro (IPR034829)|Interpro (IPR006343)|Interpro (IPR036388)|Pfam (PF07261)	EMBL (MT418910)
464	FlDop_00500 Immunodominant membrane protein	Imp	GO:0016021 - integral component of membrane	Uniprot (A0A5J6CPI0)|Interpro (A0A5J6CPI0)			EMBL (MK614707)
465	FlDop_00501 CTP synthase	CTP synthase	GO:0003883 - CTP synthase activity|GO:0005524 - ATP binding|GO:0006541 - glutamine metabolic process|GO:0016021 - integral component of membrane|GO:0044210 - 'de novo' CTP biosynthetic process|GO:0046872 - metal ion binding	Uniprot (A0A6M3YS49)|Interpro (A0A6M3YS49)		Interpro (IPR029062)|Interpro (IPR004468)|Interpro (IPR017456)|Interpro (IPR017926)|Interpro (IPR033828)|Interpro (IPR027417)|Pfam (PF06418)|Pfam (PF00117)	EMBL (MT418909)
466	FlDop_00502 Phosphatidylserine decarboxylase proenzyme	Phosphatidylserine decarboxylase	GO:0004609 - phosphatidylserine decarboxylase activity|GO:0008654 - phospholipid biosynthetic process	Uniprot (A0A660HLV5)|Interpro (A0A660HLV5)	KEGG (pzi:CWO85_00555)|KEGG GM (pzi:CWO85_00555)|KEGG EC (4.1.1.65)	Interpro (IPR003817)|Pfam (PF02666)	EMBL (CP025121)
467	FlDop_00503 hypothetical protein	CDP-alcohol phosphatidyltransferase family protein	GO:0008654 - phospholipid biosynthetic process|GO:0016021 - integral component of membrane|GO:0016780 - phosphotransferase activity for other substituted phosphate groups	Uniprot (A0A660HLW1)|Interpro (A0A660HLW1)	KEGG (pzi:CWO85_00550)|KEGG GM (pzi:CWO85_00550)|KEGG EC (2.7.8.8)	Interpro (IPR000462)|Interpro (IPR043130)|Pfam (PF01066)	EMBL (CP025121)
468	FlDop_00504 DNA-directed RNA polymerase subunit delta	RNAP delta factor	GO:0003899 - DNA-directed 5'-3' RNA polymerase activity|GO:0006351 - transcription DNA-templated|GO:0006355 - regulation of transcription DNA-templated	Uniprot (A0A660HMC6)|Interpro (A0A660HMC6)	KEGG (pzi:CWO85_00545)|KEGG GM (pzi:CWO85_00545)	Interpro (IPR007759)|Interpro (IPR038087)|Interpro (IPR029757)	EMBL (CP025121)
469	FlDop_00505 Nucleoid-associated protein YbaB	Uncharacterized protein	GO:0003677 - DNA binding	Uniprot (A0A660HLW5)|Interpro (A0A660HLW5)	KEGG (pzi:CWO85_00540)|KEGG GM (pzi:CWO85_00540)	Interpro (IPR036894)|Interpro (IPR004401)|Pfam (PF02575)	EMBL (CP025121)
470	FlDop_00506 DNA polymerase III subunit tau	DNA polymerase III subunit gamma/tau	GO:0003887 - DNA-directed DNA polymerase activity|GO:0005524 - ATP binding|GO:0006260 - DNA replication|GO:0009360 - DNA polymerase III complex	Uniprot (A0A660HLV2)|Interpro (A0A660HLV2)	KEGG (pzi:CWO85_00535)|KEGG GM (pzi:CWO85_00535)|KEGG EC (2.7.7.7)	Interpro (IPR003593)|Interpro (IPR012763)|Interpro (IPR045085)|Interpro (IPR027417)	EMBL (CP025121)
471	FlDop_00507 Metalloprotease PmbA	TldD/PmbA family protein	GO:0008237 - metallopeptidase activity	Uniprot (A0A660HML5)|Interpro (A0A660HML5)	KEGG (pzi:CWO85_00530)|KEGG GM (pzi:CWO85_00530)	Interpro (IPR045569)|Interpro (IPR045570)|Interpro (IPR035068)|Interpro (IPR036059)|Pfam (PF19289)|Pfam (PF19290)	EMBL (CP025121)
472	FlDop_00508 Metalloprotease TldD	Peptidase C69	GO:0008237 - metallopeptidase activity	Uniprot (A0A660HLV7)|Interpro (A0A660HLV7)	KEGG (pzi:CWO85_00525)|KEGG GM (pzi:CWO85_00525)	Interpro (IPR045569)|Interpro (IPR045570)|Interpro (IPR025502)|Interpro (IPR035068)|Interpro (IPR036059)|Pfam (PF19289)|Pfam (PF19290)	EMBL (CP025121)
473	FlDop_00509 ATP-dependent RNA helicase CshA	DNA helicase	GO:0003676 - nucleic acid binding|GO:0003724 - RNA helicase activity|GO:0005524 - ATP binding|GO:0016787 - hydrolase activity	Uniprot (A0A660HLV9)|Interpro (A0A660HLV9)	KEGG (pzi:CWO85_00520)|KEGG GM (pzi:CWO85_00520)|KEGG EC (3.6.4.13)	Interpro (IPR005580)|Interpro (IPR011545)|Interpro (IPR014001)|Interpro (IPR001650)|Interpro (IPR012677)|Interpro (IPR027417)|Interpro (IPR014014)|Pfam (PF03880)|Pfam (PF00270)|Pfam (PF00271)	EMBL (CP025121)
474	FlDop_00510 hypothetical protein	Uncharacterized protein		Uniprot (A0A0P7KH43)|Interpro (A0A0P7KH43)			NCBI (937511404)|EMBL (CP040925)
475	FlDop_00511 hypothetical protein
476	FlDop_00512 hypothetical protein	Uncharacterized protein	GO:0016021 - integral component of membrane	Uniprot (B3R0B1)|Interpro (B3R0B1)	KEGG (pml:ATP_00088)|KEGG GM (pml:ATP_00088)		NCBI (501495972)|EMBL (CU469464)
477	FlDop_00513 hypothetical protein	Uncharacterized protein		Uniprot (A0A660HNC2)|Interpro (A0A660HNC2)	KEGG (pzi:CWO85_00505)|KEGG GM (pzi:CWO85_00505)		EMBL (CP025121)
478	FlDop_00514 hypothetical protein	Uncharacterized protein	GO:0016021 - integral component of membrane	Uniprot (B3R030)|Interpro (B3R030)	KEGG (pml:ATP_00491)|KEGG GM (pml:ATP_00491)		NCBI (501495892)|EMBL (CU469464)
479	FlDop_00515 hypothetical protein	Uncharacterized protein		Uniprot (A0A660HNC2)|Interpro (A0A660HNC2)	KEGG (pzi:CWO85_00505)|KEGG GM (pzi:CWO85_00505)		EMBL (CP025121)
480	FlDop_00516 hypothetical protein	Uncharacterized protein		Uniprot (A0A421NXK6)|Interpro (A0A421NXK6)			EMBL (MPBG01000005)
481	FlDop_00517 hypothetical protein	Uncharacterized protein	GO:0016021 - integral component of membrane	Uniprot (A0A660HLU4)|Interpro (A0A660HLU4)	KEGG (pzi:CWO85_00495)|KEGG GM (pzi:CWO85_00495)		EMBL (CP025121)
482	FlDop_00518 deoxyribonuclease IV	Probable endonuclease	GO:0003677 - DNA binding|GO:0006281 - DNA repair|GO:0008270 - zinc ion binding|GO:0008833 - deoxyribonuclease IV (phage-T4-induced) activity	Uniprot (A0A660HLU8)|Interpro (A0A660HLU8)	KEGG (pzi:CWO85_00490)|KEGG GM (pzi:CWO85_00490)|KEGG EC (3.1.21.2)	Interpro (IPR001719)|Interpro (IPR018246)|Interpro (IPR036237)|Interpro (IPR013022)|Pfam (PF01261)	EMBL (CP025121)
483	FlDop_00519 DEAD-box ATP-dependent RNA helicase CshB	DNA helicase	GO:0003676 - nucleic acid binding|GO:0004386 - helicase activity|GO:0005524 - ATP binding	Uniprot (A0A660HMB6)|Interpro (A0A660HMB6)	KEGG (pzi:CWO85_00485)|KEGG GM (pzi:CWO85_00485)|KEGG EC (3.6.4.13)	Interpro (IPR011545)|Interpro (IPR014001)|Interpro (IPR001650)|Interpro (IPR027417)|Pfam (PF00270)|Pfam (PF00271)	EMBL (CP025121)
484	FlDop_00520 hypothetical protein	Uncharacterized protein	GO:0016021 - integral component of membrane	Uniprot (A0A660HLV0)|Interpro (A0A660HLV0)	KEGG (pzi:CWO85_00480)|KEGG GM (pzi:CWO85_00480)		EMBL (CP025121)
485	FlDop_00521 Superoxide dismutase [Mn/Fe]	Superoxide dismutase	GO:0004784 - superoxide dismutase activity|GO:0046872 - metal ion binding	Uniprot (A0A660HLT9)|Interpro (A0A660HLT9)	KEGG (pzi:CWO85_00475)|KEGG GM (pzi:CWO85_00475)|KEGG EC (1.15.1.1)	Interpro (IPR001189)|Interpro (IPR019833)|Interpro (IPR019832)|Interpro (IPR019831)|Interpro (IPR036324)|Interpro (IPR036314)|Pfam (PF02777)|Pfam (PF00081)	EMBL (CP025121)
486	FlDop_00522 hypothetical protein	Uncharacterized protein	GO:0016021 - integral component of membrane	Uniprot (A0A660HMK6)|Interpro (A0A660HMK6)	KEGG (pzi:CWO85_00470)|KEGG GM (pzi:CWO85_00470)|KEGG EC (2.7.7.103)		EMBL (CP025121)
487	FlDop_00523 Periplasmic zinc-binding protein TroA	Zinc ABC transporter substrate-binding protein	GO:0016021 - integral component of membrane|GO:0030001 - metal ion transport|GO:0046872 - metal ion binding	Uniprot (A0A660HLU9)|Interpro (A0A660HLU9)	KEGG (pzi:CWO85_00460)|KEGG GM (pzi:CWO85_00460)	Interpro (IPR006127)|Pfam (PF01297)	EMBL (CP025121)
488	FlDop_00524 High-affinity zinc uptake system ATP-binding protein ZnuC	Peptide transporter	GO:0005524 - ATP binding	Uniprot (A0A660HLS9)|Interpro (A0A660HLS9)	KEGG (pzi:CWO85_00455)|KEGG GM (pzi:CWO85_00455)|KEGG EC (7.2.2.5)	Interpro (IPR003593)|Interpro (IPR003439)|Interpro (IPR017871)|Interpro (IPR027417)|Pfam (PF00005)	EMBL (CP025121)
489	FlDop_00525 Manganese transport system membrane protein MntB	Zinc ABC transporter permease	GO:0005887 - integral component of plasma membrane|GO:0042626 - ATPase-coupled transmembrane transporter activity|GO:0043190 - ATP-binding cassette (ABC) transporter complex	Uniprot (A0A660HLZ3)|Interpro (A0A660HLZ3)	KEGG (pzi:CWO85_00450)|KEGG GM (pzi:CWO85_00450)	Interpro (IPR037294)|Interpro (IPR001626)|Pfam (PF00950)	EMBL (CP025121)
490	FlDop_00526 Manganese transport system membrane protein MntB	Metal ABC transporter permease	GO:0005887 - integral component of plasma membrane|GO:0042626 - ATPase-coupled transmembrane transporter activity|GO:0043190 - ATP-binding cassette (ABC) transporter complex	Uniprot (A0A660HLT2)|Interpro (A0A660HLT2)	KEGG (pzi:CWO85_00445)|KEGG GM (pzi:CWO85_00445)	Interpro (IPR037294)|Interpro (IPR001626)|Pfam (PF00950)	EMBL (CP025121)
491	FlDop_00527 hypothetical protein
492	FlDop_00528 ATP-dependent RNA helicase SrmB	Helicase	GO:0003677 - DNA binding|GO:0004386 - helicase activity|GO:0004518 - nuclease activity|GO:0005524 - ATP binding	Uniprot (A0A4V1VE60)|Interpro (A0A4V1VE60)		Interpro (IPR006935)|Interpro (IPR014001)|Interpro (IPR001650)|Interpro (IPR039442)|Interpro (IPR027417)|Interpro (IPR011335)|Interpro (IPR029063)|Interpro (IPR011856)|Interpro (IPR041635)|Pfam (PF00271)|Pfam (PF13156)|Pfam (PF04851)|Pfam (PF18135)	EMBL (SEHM01000001)
493	FlDop_00529 hypothetical protein	Helicase	GO:0003677 - DNA binding|GO:0004386 - helicase activity|GO:0005524 - ATP binding|GO:0008168 - methyltransferase activity|GO:0016787 - hydrolase activity|GO:0032259 - methylation	Uniprot (A0A1B1G8D4)|Interpro (A0A1B1G8D4)		Interpro (IPR002052)|Interpro (IPR006935)|Interpro (IPR014001)|Interpro (IPR001650)|Interpro (IPR039442)|Interpro (IPR027417)|Interpro (IPR011335)|Interpro (IPR029063)|Interpro (IPR041635)|Pfam (PF00271)|Pfam (PF13156)|Pfam (PF04851)|Pfam (PF18135)	NCBI (1043076677)|EMBL (CP013714)
494	FlDop_00530 endonuclease	Endonuclease	GO:0004519 - endonuclease activity	Uniprot (A0A531XZY6)|Interpro (A0A531XZY6)		Interpro (IPR011604)|Interpro (IPR017482)|Interpro (IPR011335)|Interpro (IPR019080)|Pfam (PF09588)	EMBL (SRMC01000005)
495	FlDop_00531 hypothetical protein (SAP21-like protein)	SVM_signal domain-containing protein		Uniprot (A0A421NUT3)|Interpro (A0A421NUT3)		Interpro (IPR021970)|Pfam (PF12113)	EMBL (MPBG01000009)
496	FlDop_00532 hypothetical protein	Uncharacterized protein		Uniprot (A0A660HM42)|Interpro (A0A660HM42)	KEGG (pzi:CWO85_00895)|KEGG GM (pzi:CWO85_00895)		EMBL (CP025121)
497	FlDop_00533 hypothetical protein	ABC transporter substrate-binding protein	GO:0042597 - periplasmic space|GO:0043190 - ATP-binding cassette (ABC) transporter complex|GO:0055085 - transmembrane transport	Uniprot (A0A660HMS6)|Interpro (A0A660HMS6)	KEGG (pzi:CWO85_01305)|KEGG GM (pzi:CWO85_01305)	Interpro (IPR030678)|Interpro (IPR039424)|Interpro (IPR000914)|Pfam (PF00496)	EMBL (CP025121)
498	FlDop_00534 Ribosomal RNA small subunit methyltransferase G	Ribosomal RNA small subunit methyltransferase G	GO:0005737 - cytoplasm|GO:0070043 - rRNA (guanine-N7-)-methyltransferase activity	Uniprot (A0A660HND6)|Interpro (A0A660HND6)	KEGG (pzi:CWO85_01315)|KEGG GM (pzi:CWO85_01315)|KEGG EC (2.1.1.170)	Interpro (IPR003682)|Interpro (IPR029063)|Pfam (PF02527)	EMBL (CP025121)
499	FlDop_00535 tRNA uridine 5-carboxymethylaminomethyl modification enzyme MnmG	tRNA uridine 5-carboxymethylaminomethyl modification enzyme MnmG	GO:0002098 - tRNA wobble uridine modification|GO:0005737 - cytoplasm|GO:0050660 - flavin adenine dinucleotide binding	Uniprot (A0A660HMA0)|Interpro (A0A660HMA0)	KEGG (pzi:CWO85_01320)|KEGG GM (pzi:CWO85_01320)	Interpro (IPR036188)|Interpro (IPR004416)|Interpro (IPR002218)|Interpro (IPR020595)|Interpro (IPR026904)|Interpro (IPR044920)|Interpro (IPR040131)|Pfam (PF01134)|Pfam (PF13932)	EMBL (CP025121)
500	FlDop_00536 hypothetical protein	Uncharacterized protein	GO:0016021 - integral component of membrane	Uniprot (A0A660HMG3)|Interpro (A0A660HMG3)	KEGG (pzi:CWO85_01325)|KEGG GM (pzi:CWO85_01325)		EMBL (CP025121)
501	FlDop_00537 tRNA-specific adenosine deaminase	tRNA-specific adenosine deaminase	GO:0002100 - tRNA wobble adenosine to inosine editing|GO:0008251 - tRNA-specific adenosine deaminase activity|GO:0008270 - zinc ion binding	Uniprot (A0A660HMB8)|Interpro (A0A660HMB8)	KEGG (pzi:CWO85_01335)|KEGG GM (pzi:CWO85_01335)|KEGG EC (3.5.4.33)	Interpro (IPR016192)|Interpro (IPR002125)|Interpro (IPR016193)|Interpro (IPR028883)|Pfam (PF14437)	EMBL (CP025121)
502	FlDop_00538 Thymidine kinase	Thymidine kinase	GO:0004797 - thymidine kinase activity|GO:0005524 - ATP binding|GO:0005737 - cytoplasm|GO:0008270 - zinc ion binding|GO:0071897 - DNA biosynthetic process	Uniprot (A0A660HMC0)|Interpro (A0A660HMC0)	KEGG (pzi:CWO85_01340)|KEGG GM (pzi:CWO85_01340)|KEGG EC (2.7.1.21)	Interpro (IPR027417)|Interpro (IPR001267)|Pfam (PF00265)	EMBL (CP025121)
503	FlDop_00539 50S ribosomal protein L31	50S ribosomal protein L31	GO:0003735 - structural constituent of ribosome|GO:0005840 - ribosome|GO:0006412 - translation	Uniprot (A0A660HMD0)|Interpro (A0A660HMD0)	KEGG (pzi:CWO85_01345)|KEGG GM (pzi:CWO85_01345)	Interpro (IPR034704)|Interpro (IPR002150)|Interpro (IPR042105)|Pfam (PF01197)	EMBL (CP025121)
504	FlDop_00540 Serine hydroxymethyltransferase	Serine hydroxymethyltransferase	GO:0004372 - glycine hydroxymethyltransferase activity|GO:0005737 - cytoplasm|GO:0008168 - methyltransferase activity|GO:0019264 - glycine biosynthetic process from serine|GO:0030170 - pyridoxal phosphate binding|GO:0032259 - methylation|GO:0035999 - tetrahydrofolate interconversion	Uniprot (A0A660HN28)|Interpro (A0A660HN28)	KEGG (pzi:CWO85_01350)|KEGG GM (pzi:CWO85_01350)|KEGG EC (2.1.2.1)	Interpro (IPR015424)|Interpro (IPR015421)|Interpro (IPR015422)|Interpro (IPR001085)|Interpro (IPR019798)|Interpro (IPR039429)|Pfam (PF00464)	EMBL (CP025121)
505	FlDop_00541 hypothetical protein	Uncharacterized protein	GO:0004386 - helicase activity	Uniprot (A0A0M1MZ93)|Interpro (A0A0M1MZ93)			NCBI (924547091)|EMBL (LHCF01000034)
506	FlDop_00542 Ribonucleoside-diphosphate reductase subunit alpha 1	Ribonucleoside-diphosphate reductase	GO:0004748 - ribonucleoside-diphosphate reductase activity thioredoxin disulfide as acceptor|GO:0005524 - ATP binding|GO:0006260 - DNA replication|GO:0006464 - cellular protein modification process|GO:0010181 - FMN binding	Uniprot (A0A660HMB5)|Interpro (A0A660HMB5)	KEGG (pzi:CWO85_01355)|KEGG GM (pzi:CWO85_01355)|KEGG EC (1.17.4.1)	Interpro (IPR029039)|Interpro (IPR013346)|Interpro (IPR026459)|Interpro (IPR000788)|Interpro (IPR013509)|Interpro (IPR013554)|Interpro (IPR004465)|Interpro (IPR008926)|Interpro (IPR039718)|Pfam (PF07972)|Pfam (PF02867)|Pfam (PF00317)|Pfam (PF08343)	EMBL (CP025121)
