# Supplementary material for: The Complete Genome of the “Flavescence Dorée” Phytoplasma Reveals Characteristics of Low Genome Plasticity
Source: Biology (Basel). 2022 Jun 23;11(7):953. doi: 10.3390/biology11070953 (PMC9312162; doi:10.3390/biology11070953)
Supplement: Supplementary file 1 [file biology-11-00953-s001.zip › Supplementary Table_S3.xlsx]

## Sheet: Transport
	Table S3. CDSs associated with transport function
	Protein ID	Function
	FlDop_00030	ABC transporter ATP-binding protein YxdL
	FlDop_00036	L-arabinose transport system permease protein AraQ (malG)
	FlDop_00037	Lactose transport system permease protein LacF (malF)
	FlDop_00038	sn-glycerol-3-phosphate import ATP-binding protein UgpC
	FlDop_00043	MATE family efflux transporter
	FlDop_00052	Protein translocase subunit SecA
	FlDop_00072	Zinc-transporting ATPase
	FlDop_00121	putative cation-transporting ATPase E
	FlDop_00124	preprotein translocase subunit SecE
	FlDop_00166	Methionine import ATP-binding protein MetN
	FlDop_00168	D-methionine transport system permease protein MetI
	FlDop_00173	Calcium-transporting ATPase
	FlDop_00188	hypothetical protein (ABC transporter substrate-binding protein)
	FlDop_00209	Calcium-transporting ATPase 1
	FlDop_00234	Citrate/malate transporter
	FlDop_00270	L-arabinose transport system permease protein AraQ (malG)
	FlDop_00271	Lactose transport system permease protein LacF (malF)
	FlDop_00272	sn-glycerol-3-phosphate import ATP-binding protein UgpC
	FlDop_00280	Spermidine/putrescine-binding periplasmic protein
	FlDop_00281	Inner membrane ABC transporter permease protein YdcV
	FlDop_00282	Spermidine/putrescine transport system permease protein PotB
	FlDop_00283	Spermidine/putrescine import ATP-binding protein PotA
	FlDop_00291	hypothetical protein (ABC-type oligopeptide transport system periplasmatic component)
	FlDop_00327	hypothetical protein (Probable ABC transporter periplasmic component)
	FlDop_00333	Citrate/malate transporter
	FlDop_00339	Energy-coupling factor transporter transmembrane protein EcfT
	FlDop_00340	Energy-coupling factor transporter ATP-binding protein EcfA2
	FlDop_00341	Energy-coupling factor transporter ATP-binding protein EcfA1
	FlDop_00349	Protein translocase subunit SecY
	FlDop_00425	Trigger factor
	FlDop_00484	Membrane protein insertase YidC 2
	FlDop_00485	Citrate/malate transporter
	FlDop_00489	putative ABC transporter ATP-binding protein
	FlDop_00490	putative ABC transporter ATP-binding protein
	FlDop_00493	ABC transporter ATP-binding protein YxdL
	FlDop_00523	Periplasmic zinc-binding protein TroA
	FlDop_00524	High-affinity zinc uptake system ATP-binding protein ZnuC
	FlDop_00525	Zinc ABC transporter permease
	FlDop_00526	Manganese transport system membrane protein MntB
	FlDop_00533	hypothetical protein (ABC transporter substrate-binding protein)

## Sheet: Restriction endonuclease
	Table S3. CDSs associated with endonuclease function
	Protein ID	Function
	FlDop_00289	putative type I restriction enzyme M protein
	FlDop_00453	Restriction enzyme BgcI subunit beta
	FlDop_00454	Restriction enzyme BgcI subunit alpha
	FlDop_00467	Type-1 restriction enzyme R protein
	FlDop_00468	Type I restriction enzyme EcoKI M protein
	FlDop_00469	Restriction endonuclease subunit S

## Sheet: Glycolysis
	Table S3. CDSs associated with glycolysis
	Protein ID	Function
	FlDop_00042	Glucose-6-phosphate isomerase
	FlDop_00094	Enolase
	FlDop_00095	23-bisphosphoglycerate-independent phosphoglycerate mutase
	FlDop_00096	ATP-dependent 6-phosphofructokinase isozyme 1
	FlDop_00097	Phosphoglycerate kinase
	FlDop_00098	Glyceraldehyde-3-phosphate dehydrogenase
	FlDop_00099	Fructose-bisphosphate aldolase
	FlDop_00146	Triosephosphate isomerase
	FlDop_00159	Pyruvate kinase
	FlDop_00198	Sucrose phosphorylase

## Sheet: Pyruvate oxidation
	Table S3. CDSs associated with pyruvate oxidation
	Protein ID	Function
	FlDop_00224	Pyruvate dehydrogenase E1 component subunit alpha
	FlDop_00225	Pyruvate dehydrogenase E1 component subunit beta
	FlDop_00226	Dihydrolipoyllysine-residue acetyltransferase component of pyruvate dehydrogenase complex
	FlDop_00227	Dihydrolipoyllysine-residue acetyltransferase component of pyruvate dehydrogenase complex
	FlDop_00228	Dihydrolipoyl dehydrogenase

## Sheet: ftsH
	Table S3. CDSs coding for FtsH proteins
	Protein ID	Function
	FlDop_00067	ATP-dependent zinc metalloprotease FtsH
	FlDop_00152	ATP-dependent zinc metalloprotease FtsH
	FlDop_00189	ATP-dependent zinc metalloprotease FtsH
	FlDop_00205	ATP-dependent zinc metalloprotease FtsH
	FlDop_00238	ATP-dependent zinc metalloprotease FtsH
	FlDop_00249	ATP-dependent zinc metalloprotease FtsH
	FlDop_00251	ATP-dependent zinc metalloprotease FtsH
	FlDop_00264	ATP-dependent zinc metalloprotease FtsH
	FlDop_00292	ATP-dependent zinc metalloprotease FtsH
	FlDop_00296*	ATP-dependent zinc metalloprotease FtsH
	FlDop_00328	ATP-dependent zinc metalloprotease FtsH
	FlDop_00379	ATP-dependent zinc metalloprotease FtsH
	FlDop_00423	ATP-dependent zinc metalloprotease FtsH
	FlDop_00449	ATP-dependent zinc metalloprotease FtsH
	FlDop_00473	ATP-dependent zinc metalloprotease FtsH
	FlDop_00488	ATP-dependent zinc metalloprotease FtsH
	FlDop_00495	ATP-dependent zinc metalloprotease FtsH
	*partial CDS

## Sheet: PMU Genes
	Table S3. CDSs associated with Potential Mobile Units
	Protein ID	Function
	FlDop_00012	Single-stranded DNA-binding protein A (ssb)
	FlDop_00015	Replicative DNA helicase (dnaB)
	FlDop_00137	Hypothetical protein (partial Rad50)
	FlDop_00337	Thymidylate kinase (tmk)
	FlDop_00388	DNA-binding protein HU (himA)
	FlDop_00432	DNA primase (dnaG)
	FlDop_00433	RNA polymerase sigma factor SigA (rpoD)
	FlDop_00466	Site-specific integrase
	FlDop_00476	IS3 family transposase (similar to tra5)
	FtsH proteins are not listed
