# Supplementary material for: The Complete Genome of the “Flavescence Dorée” Phytoplasma Reveals Characteristics of Low Genome Plasticity
Source: Biology (Basel). 2022 Jun 23;11(7):953. doi: 10.3390/biology11070953 (PMC9312162; doi:10.3390/biology11070953)
Supplement: Supplementary file 1 [file biology-11-00953-s001.zip › Supplementary Table_S4.xlsx]

## Sheet: Feuil1
	Table S4. Singletons from the FDp genome
	Protein ID	Function
	FlDop_00005	hypothetical protein
	FlDop_00007	hypothetical protein
	FlDop_00008	hypothetical protein
	FlDop_00048	hypothetical protein
	FlDop_00049	hypothetical protein
	FlDop_00109	hypothetical protein
	FlDop_00111	putative restriction endonuclease
	FlDop_00138	hypothetical protein
	FlDop_00140	hypothetical protein
	FlDop_00141	hypothetical protein
	FlDop_00155	partial 30S ribosomal protein S14
	FlDop_00156	hypothetical protein
	FlDop_00158	hypothetical protein
	FlDop_00181	hypothetical protein
	FlDop_00182	hypothetical protein
	FlDop_00187	hypothetical protein
	FlDop_00188	putative ABC transporter substrate-binding protein
	FlDop_00194	hypothetical protein
	FlDop_00195	hypothetical protein
	FlDop_00204	hypothetical protein
	FlDop_00207	hypothetical protein
	FlDop_00211	hypothetical protein
	FlDop_00215	hypothetical protein
	FlDop_00246	hypothetical protein
	FlDop_00247	hypothetical protein
	FlDop_00248	hypothetical protein
	FlDop_00275	hypothetical protein
	FlDop_00278	hypothetical protein
	FlDop_00279	Hypothetical transmembrane protein 1 (htmp1)
	FlDop_00288	hypothetical protein
	FlDop_00290	hypothetical protein
	FlDop_00295	hypothetical protein
	FlDop_00296	ATP-dependent zinc metalloprotease FtsH
	FlDop_00308	hypothetical protein
	FlDop_00309	hypothetical protein
	FlDop_00312	hypothetical protein
	FlDop_00314	hypothetical protein
	FlDop_00330	hypothetical protein
	FlDop_00333	Citrate/malate transporter
	FlDop_00346	50S ribosomal protein L36*
	FlDop_00383	hypothetical protein
	FlDop_00402*	Hypothetical transmembrane protein 3 (htmp3)
	FlDop_00403	hypothetical protein
	FlDop_00420	Hypothetical transmembrane protein 4 (htmp4)
	FlDop_00422	hypothetical protein
	FlDop_00447	hypothetical protein
	FlDop_00450	hypothetical protein
	FlDop_00451	hypothetical protein
	FlDop_00452	hypothetical protein
	FlDop_00455	hypothetical protein (Restriction enzyme alpha subunit)
	FlDop_00464	hypothetical protein
	FlDop_00486	hypothetical protein
	FlDop_00487	hypothetical protein
	FlDop_00511	hypothetical protein
	FlDop_00520	hypothetical protein
	FlDop_00541	hypothetical protein
	*Predicted in other phytoplasmas
